# Supplementary material for: Inertial and viscous flywheel sensing of nanoparticles
Source: Nat Commun. 2021 Aug 24;12:5099. doi: 10.1038/s41467-021-25266-3 (PMC8385060; doi:10.1038/s41467-021-25266-3)
Supplement: Supplementary file 7 — Source data [file 41467_2021_25266_MOESM7_ESM.xls]

## Sheet: Description
Date completed	2021-06-18
compiled by	Georgios 'Yorgos' Katsikis
contact	geokats@mit.edu
Description	First tab contains data in Fig. 4, S12
	The following tabs contain source data for each device, here denoted by main dimensions HxWxL (in microns) with reference to Table S1. The diameter d in the name in each tab refers to nominal diameter (dnom) with reference to Table S2. The last tab "HxWxL=15x20x321 | d=9.2" refers to glass microspheres with measurements plotted in Fig. S11

## Sheet: Data Figs 4, S12
reference volume V_ref (um3)	measured volume V_meas (um3)	density ratio rho_p,meas/rho_nom (um3)
0.00814957	0.00565602	1.02227
0.00824088	0.00973447	0.992249
0.00834436	0.00747553	1.00587
0.00835673	0.00878861	0.997518
0.0084161	0.00794506	1.003
0.00845814	0.0073516	1.00761
0.00847677	0.00792192	1.00354
0.00848206	0.00620288	1.01857
0.00854846	0.0106888	0.989887
0.00856886	0.0024333	1.12748
0.00857161	0.00334256	1.07908
0.00858137	0.00921614	0.996524
0.00863434	0.00745921	1.00796
0.00863654	0.00764405	1.00656
0.00866707	0.00923962	0.996874
0.00874243	0.00718174	1.01099
0.00877159	0.00705931	1.01226
0.00878113	0.00759814	1.00787
0.00878257	0.00754139	1.00832
0.00879131	0.00784043	1.00613
0.00880034	0.00634858	1.01952
0.00880272	0.00652826	1.01761
0.00880812	0.00852154	1.0017
0.00880926	0.00449267	1.04857
0.00881331	0.00605803	1.02299
0.00882048	0.00639346	1.01919
0.0088364	0.00891173	0.999579
0.00883682	0.00819639	1.00395
0.00884297	0.00867198	1.001
0.00888259	0.0076569	1.0081
0.00891698	0.0109079	0.990785
0.00891927	0.00917394	0.998604
0.00893212	0.00376884	1.06926
0.00893514	0.00634877	1.02059
0.00896916	0.00965012	0.996442
0.00898269	0.00501817	1.03994
0.00898655	0.0125367	0.985701
0.00899514	0.0103364	0.993451
0.00901568	0.0060873	1.02432
0.00901828	0.00773878	1.00836
0.00902115	0.00604209	1.02493
0.00902483	0.00710276	1.01368
0.00902589	0.00559578	1.03099
0.00903229	0.0080611	1.0061
0.0090356	0.00658307	1.01884
0.00904456	0.00746655	1.01069
0.00906953	0.0056904	1.03002
0.00908072	0.00680152	1.01694
0.0090812	0.00995593	0.995569
0.00908965	0.0102927	0.994103
0.00909452	0.00817965	1.00566
0.00910102	0.00773768	1.00891
0.00910474	0.0103767	0.993815
0.00910598	0.00957761	0.997521
0.00911157	0.00644398	1.02093
0.00911757	0.0112712	0.990355
0.00912128	0.00888628	1.00135
0.00913867	0.00906549	1.00042
0.00914287	0.00902696	1.00066
0.00914939	0.00879325	1.00206
0.00915408	0.00783581	1.00851
0.00915868	0.00700575	1.01554
0.00916698	0.00744504	1.0117
0.00918021	0.00941091	0.998771
0.00918235	0.00849355	1.00411
0.0091835	0.0101107	0.995376
0.00919403	0.00526361	1.03775
0.00919502	0.00551796	1.03369
0.0091992	0.0082863	1.00558
0.00921463	0.0090559	1.0009
0.00922098	0.00837538	1.00511
0.00923894	0.00804145	1.00754
0.00924082	0.0100273	0.996047
0.00924487	0.00842975	1.0049
0.00927328	0.0102378	0.99525
0.00928698	0.00947437	0.999011
0.00929116	0.00808882	1.00752
0.00930137	0.00953911	0.998751
0.0093036	0.0078712	1.00921
0.00931067	0.0083247	1.006
0.0093165	0.00735385	1.0135
0.0093278	0.0153173	0.980255
0.00933626	0.0140517	0.983056
0.00934778	0.0111159	0.991974
0.00935989	0.00958206	0.99884
0.0093794	0.0111697	0.991912
0.00938317	0.00732857	1.01418
0.00939552	0.0080581	1.0084
0.00939576	0.00935927	1.00021
0.00940107	0.00796154	1.00915
0.00940646	0.00726163	1.01494
0.00940856	0.00729364	1.01467
0.00944227	0.00863162	1.00476
0.00946888	0.00996829	0.997481
0.00947563	0.00935386	1.00067
0.00951104	0.0103499	0.995917
0.00953742	0.00984942	0.998412
0.00954712	0.00623752	1.02683
0.00955514	0.00900166	1.00312
0.00955573	0.0132779	0.985849
0.0095604	0.00985911	0.998482
0.0095724	0.0103886	0.996043
0.00961646	0.0132616	0.986125
0.00964167	0.0120014	0.990079
0.00964299	0.0109134	0.994132
0.00966626	0.0117231	0.991148
0.00968098	0.010223	0.997335
0.00971942	0.00903591	1.00384
0.00983674	0.00884306	1.0057
0.00989888	0.00759139	1.01538
0.00999695	0.0112514	0.994383
0.0226436	0.0213817	1.00293
0.025761	0.0275929	0.996612
0.0258176	0.027076	0.99762
0.0267811	0.0265831	1.00035
0.0268571	0.0249594	1.00382
0.027736	0.0284437	0.998722
0.0277939	0.0295202	0.997023
0.028882	0.0292871	0.999287
0.0290755	0.0302271	0.998061
0.0292144	0.0318367	0.995822
0.0293843	0.0301019	0.998784
0.029674	0.0304342	0.998728
0.0298028	0.0320407	0.996458
0.0300972	0.0297558	1.00057
0.0301075	0.0319861	0.997022
0.0301884	0.0304491	0.999561
0.0302106	0.0359995	0.991859
0.0302819	0.0319962	0.997284
0.0303556	0.0326022	0.996508
0.0304188	0.0359457	0.992217
0.0304208	0.0285248	1.00336
0.0305938	0.0305543	1.00006
0.0305954	0.0287353	1.00327
0.0306212	0.0286369	1.0035
0.0306215	0.0329051	0.996485
0.0307392	0.0312307	0.999201
0.0307523	0.0290929	1.00288
0.0307978	0.0294738	1.00227
0.0308836	0.033239	0.996412
0.0308845	0.0355755	0.993326
0.0309037	0.0329187	0.9969
0.0309575	0.0384746	0.990114
0.0309971	0.0321702	0.998153
0.0310304	0.0325914	0.997575
0.0310497	0.0300999	1.0016
0.0311196	0.0350809	0.994285
0.0311552	0.0339769	0.995797
0.0311806	0.0350318	0.994437
0.0311899	0.0328629	0.997423
0.0312043	0.0312106	0.999989
0.031226	0.0345156	0.995177
0.0312524	0.0321126	0.998644
0.0312722	0.0327857	0.997664
0.0312749	0.0332557	0.996986
0.0312884	0.0322802	0.998445
0.0313032	0.0321283	0.9987
0.0313587	0.0272451	1.00764
0.0313663	0.0343475	0.995608
0.0314011	0.0339229	0.996239
0.0314211	0.0320776	0.998965
0.0314216	0.0327937	0.997883
0.0314581	0.0329129	0.997764
0.0314848	0.033561	0.99687
0.0315892	0.038757	0.990644
0.0316099	0.0317252	0.999818
0.0316443	0.0334347	0.997292
0.0317042	0.030669	1.00171
0.0317377	0.0338753	0.996809
0.031742	0.0328911	0.998234
0.0317448	0.0313669	1.00061
0.0317501	0.0311942	1.0009
0.0317943	0.0335312	0.997381
0.0318218	0.0347488	0.99574
0.0318245	0.0312237	1.00098
0.0318656	0.0332539	0.99789
0.0318686	0.0330291	0.998225
0.0318788	0.0341295	0.996665
0.0319024	0.0336399	0.997389
0.0319078	0.0350774	0.99543
0.03194	0.0352611	0.995237
0.0319526	0.0348257	0.995828
0.0319669	0.0292391	1.00473
0.0320015	0.0366744	0.993556
0.0320457	0.0275641	1.00824
0.0320459	0.0340787	0.996985
0.0320763	0.0324035	0.999493
0.0321164	0.0297141	1.0041
0.0321239	0.0370937	0.993224
0.0321303	0.0340076	0.99721
0.0321314	0.0357989	0.99482
0.0321775	0.0333152	0.998276
0.0321847	0.0333813	0.99819
0.0322185	0.0307893	1.00235
0.0322268	0.0328353	0.999067
0.0322353	0.0325974	0.999443
0.0322568	0.0336336	0.997933
0.0322703	0.0350287	0.996019
0.0322938	0.0352574	0.995751
0.0323152	0.0343113	0.997061
0.032391	0.0321578	1.00037
0.0324009	0.0333991	0.998493
0.0324241	0.0332164	0.998799
0.0324547	0.0353806	0.99582
0.0324636	0.0386964	0.991855
0.0325305	0.0328913	0.999451
0.032538	0.0330116	0.99928
0.0325398	0.0323079	1.00037
0.0325643	0.032726	0.999757
0.032572	0.0350027	0.996492
0.0325767	0.0342197	0.997576
0.0326239	0.022958	1.02134
0.0326255	0.0309912	1.00268
0.0327132	0.0337162	0.998502
0.0329086	0.0340623	0.998294
0.0329562	0.0346754	0.997499
0.0329832	0.0350962	0.996961
0.0330015	0.0335164	0.999231
0.0331256	0.0344055	0.998126
0.0331654	0.0352697	0.996989
0.0331885	0.0344345	0.998178
0.0332249	0.0330599	1.00026
0.0332704	0.0352813	0.997125
0.033351	0.0402571	0.991328
0.0334707	0.032393	1.0017
0.0335434	0.0341109	0.999169
0.0335577	0.0419361	0.9899
0.0572708	0.061795	0.996253
0.0596708	0.0607002	0.999109
0.0610308	0.0575438	1.00304
0.061377	0.0628764	0.998765
0.0614272	0.0640881	0.99787
0.0614777	0.0565492	1.00439
0.0615017	0.0633678	0.998482
0.0615348	0.065979	0.996562
0.0615628	0.0644226	0.997725
0.0618187	0.0639428	0.998292
0.061823	0.0667941	0.996204
0.0618929	0.0594219	1.00208
0.0619556	0.0661502	0.996763
0.0619563	0.0642274	0.998184
0.0619693	0.0651305	0.997516
0.061972	0.0658383	0.997
0.061983	0.0619569	0.999997
0.0620103	0.0482326	1.01446
0.0620287	0.0629214	0.999257
0.0621064	0.0604956	1.00133
0.0621077	0.0644055	0.998168
0.0621119	0.0622404	0.999872
0.0621462	0.0636655	0.998767
0.0621585	0.0632751	0.999082
0.0621623	0.0647348	0.997963
0.0621687	0.063001	0.999307
0.0622966	0.0632934	0.999179
0.0622998	0.0655408	0.997471
0.062331	0.0649757	0.997914
0.0623435	0.0663059	0.996949
0.0623799	0.0644235	0.99837
0.0624027	0.0638157	0.998855
0.0624209	0.0606603	1.00145
0.0624249	0.0621754	1.00018
0.0624357	0.0637784	0.99891
0.0624376	0.0662113	0.997089
0.0624486	0.0648205	0.998123
0.0624511	0.0666848	0.99676
0.06246	0.0640851	0.998692
0.0624787	0.0616433	1.00066
0.0625124	0.0635912	0.999118
0.0625158	0.0592523	1.00277
0.0625257	0.0643352	0.998552
0.0625602	0.0663487	0.997084
0.0625799	0.0659455	0.997391
0.0626332	0.06369	0.999137
0.0626465	0.0626169	1
0.0627021	0.063471	0.999364
0.0627053	0.0673596	0.996477
0.062717	0.0665009	0.997095
0.0627223	0.0676419	0.996293
0.0627303	0.0625156	1.00015
0.0627399	0.0603135	1.00202
0.0627448	0.0623245	1.00032
0.0628192	0.0637109	0.999269
0.0628439	0.063562	0.999406
0.0628733	0.0648346	0.998446
0.0628752	0.0658417	0.997695
0.0628787	0.0619413	1.00075
0.0628797	0.066679	0.997091
0.0629307	0.0662756	0.997421
0.0629551	0.0620281	1.00074
0.0629555	0.0719968	0.993616
0.0629571	0.0674857	0.996578
0.0629597	0.0662538	0.997459
0.0629733	0.0658091	0.997795
0.0629949	0.0632752	0.999755
0.0630085	0.0634503	0.999626
0.0630458	0.0635344	0.99959
0.0630659	0.0650809	0.99841
0.0631061	0.0648226	0.998637
0.0631147	0.059006	1.00351
0.0631234	0.066144	0.997665
0.063127	0.0670791	0.996994
0.0631321	0.0645211	0.998888
0.0631462	0.0663683	0.997519
0.0631555	0.0681603	0.996259
0.0631751	0.0651919	0.998412
0.0631806	0.0683845	0.996123
0.063191	0.0666685	0.997336
0.0631915	0.0692999	0.995513
0.0632121	0.0609279	1.00188
0.0632149	0.0618588	1.00109
0.0632188	0.0641762	0.999224
0.0632193	0.0684565	0.996103
0.0632233	0.0647406	0.998792
0.0632627	0.0644015	0.999084
0.0632639	0.0606025	1.00221
0.0632647	0.0660816	0.99782
0.0632814	0.0631285	1.0001
0.063291	0.0677324	0.996657
0.0633238	0.0675455	0.996813
0.0633486	0.0703539	0.994935
0.0633563	0.0661108	0.997869
0.0633735	0.0639273	0.999541
0.0634088	0.0671129	0.997183
0.0634796	0.0623099	1.00093
0.0634998	0.0623165	1.00094
0.0635087	0.0667088	0.99755
0.0635111	0.0666148	0.997619
0.0635203	0.0664531	0.997744
0.0635278	0.066391	0.997795
0.0635632	0.0665099	0.997735
0.0636009	0.0653232	0.998645
0.063609	0.0656515	0.998404
0.063621	0.0644872	0.9993
0.0636542	0.0633831	1.0002
0.0636796	0.0647949	0.999109
0.0636864	0.0626239	1.00084
0.0637408	0.0651773	0.998864
0.063744	0.0685301	0.996442
0.0637827	0.065061	0.998986
0.0638021	0.0672972	0.99735
0.0638131	0.0660928	0.998233
0.0638162	0.0667723	0.997738
0.0638246	0.0694305	0.99589
0.0638319	0.0655729	0.998636
0.0638374	0.0637184	1.00008
0.0638399	0.0652934	0.998853
0.0638991	0.0663613	0.998101
0.0639037	0.0643123	0.99966
0.0639189	0.0674302	0.997343
0.0639217	0.0678217	0.997068
0.0639664	0.062922	1.00082
0.0639913	0.0660942	0.99837
0.0640134	0.0660752	0.998401
0.0640587	0.0667594	0.997932
0.0640689	0.0612924	1.00228
0.0640978	0.0671178	0.997702
0.0641154	0.0664547	0.998198
0.0641479	0.0708346	0.995199
0.0641709	0.06942	0.996151
0.0642238	0.0660725	0.998565
0.0642553	0.0689285	0.996547
0.0642731	0.0671073	0.997842
0.0643437	0.0664048	0.99841
0.0643816	0.069366	0.996342
0.0644531	0.0669704	0.998078
0.064557	0.0654044	0.999327
0.168749	0.141007	1.00988
0.172377	0.0635435	1.0868
0.175396	0.141424	1.01209
0.175518	0.208548	0.99192
0.176642	0.208809	0.992139
0.176794	0.299271	0.979249
0.177388	0.132721	1.01697
0.177794	0.15492	1.0074
0.177875	0.310184	0.978376
0.177927	0.211756	0.991852
0.178431	0.299851	0.979467
0.178616	0.104233	1.03609
0.179253	0.109073	1.03253
0.179704	0.236851	0.987733
0.179738	0.215009	0.991637
0.179883	0.297842	0.979916
0.180135	0.093138	1.04728
0.180719	0.311099	0.978753
0.180777	0.285036	0.981445
0.182018	0.24382	0.987118
0.182205	0.118117	1.02742
0.182322	0.239486	0.987865
0.182404	0.175011	1.00207
0.182647	0.135614	1.0175
0.182697	0.171373	1.00328
0.182864	0.38754	0.973252
0.182949	0.281008	0.982296
0.183135	0.248581	0.986624
0.183244	0.439576	0.97048
0.183697	0.283034	0.982194
0.183818	0.166794	1.0051
0.184046	0.231274	0.989609
0.184789	0.460459	0.969696
0.185376	0.412601	0.972115
0.185818	0.339361	0.977072
0.186154	0.245647	0.987691
0.186316	0.320064	0.978817
0.186328	0.177597	1.00243
0.186544	0.314664	0.979358
0.187536	0.0938494	1.05056
0.188992	0.304659	0.980748
0.190114	0.370188	0.975358
0.69906	0.695012	1.0003
0.699957	0.653961	1.00358
0.703287	0.893662	0.989171
0.705438	0.868619	0.990449
0.705444	0.875695	0.990116
0.706	0.668538	1.00286
0.706466	0.805638	0.99374
0.706618	0.946349	0.987127
0.707747	0.907855	0.988797
0.707939	0.637343	1.00565
0.707951	0.76552	0.996176
0.708784	0.797668	0.994334
0.709672	0.83764	0.992233
0.709769	0.868478	0.99071
0.709838	0.770149	0.996018
0.709874	0.819326	0.993208
0.709999	0.683586	1.00197
0.710415	0.818152	0.993304
0.710584	0.926206	0.988169
0.711076	0.917863	0.98855
0.7111	0.863929	0.991007
0.711121	0.854539	0.991468
0.71123	0.704667	1.00048
0.711846	0.762595	0.996617
0.711948	0.920235	0.988497
0.712057	0.8602	0.991245
0.712276	0.751821	0.997327
0.712385	0.819351	0.993363
0.713054	0.822857	0.993216
0.713255	0.844096	0.99212
0.713419	0.916275	0.988749
0.713469	0.913671	0.988864
0.713519	0.774331	0.996008
0.713578	0.847371	0.991973
0.714011	0.863533	0.991198
0.714699	0.863443	0.991243
0.714836	0.910213	0.989091
0.715166	0.87012	0.990948
0.715403	0.610796	1.00873
0.715894	0.882873	0.990387
0.715937	0.971081	0.986651
0.715964	0.788342	0.995333
0.715975	0.754107	0.997431
0.716012	0.897328	0.98973
0.716101	0.812211	0.993985
0.716261	0.858654	0.991571
0.716556	0.897624	0.989748
0.716701	0.798939	0.994768
0.717108	0.907867	0.989322
0.717194	0.896954	0.989815
0.717524	0.841749	0.992498
0.717694	0.79478	0.99507
0.717753	0.839514	0.992628
0.717921	0.780598	0.995919
0.718299	0.918817	0.98891
0.718455	0.824628	0.993455
0.718633	0.985141	0.986256
0.718736	0.890263	0.990208
0.718884	0.891198	0.990173
0.718927	0.855129	0.991904
0.719238	0.96697	0.986984
0.719328	0.85092	0.99214
0.720061	1.06369	0.983593
0.720148	0.912691	0.989279
0.72025	0.980009	0.986534
0.720984	0.815835	0.994091
0.721969	0.979433	0.986645
0.722754	0.616056	1.00884
0.722873	1.05613	0.983974
0.723746	0.776332	0.99656
0.723964	0.745989	0.998504
0.724681	1.00757	0.985738
0.725349	0.886029	0.990784
0.725617	0.734576	0.999387
0.72788	0.878898	0.991269
0.727976	0.876263	0.991401
0.728327	1.1054	0.982679
0.728455	0.869362	0.991764
0.728641	0.878608	0.991327
0.728916	0.821459	0.994276
0.729664	0.801436	0.995451
0.729985	0.75793	0.998132
0.730086	0.914656	0.989747
0.730602	0.854777	0.992619
0.730967	0.823749	0.994278
0.73154	0.787557	0.996389
0.731967	0.827025	0.994161
0.73211	0.944341	0.988582
0.732917	0.878146	0.991597
0.733162	0.944837	0.988618
0.733363	0.795826	0.996015
0.734274	0.915765	0.989931
0.734466	0.91223	0.9901
0.736311	0.832469	0.994133
0.736863	0.801982	0.995878
0.738031	0.868785	0.992354
0.739003	0.891454	0.991312
0.739681	0.897291	0.991077
0.741135	0.862794	0.992838
0.741835	0.868173	0.992608
0.742349	0.847713	0.993688
0.742353	1.03972	0.985475
0.743415	0.888035	0.991728
0.743745	0.894378	0.991445
0.744594	0.875294	0.992416
0.74462	0.868035	0.992779
0.746075	0.830134	0.99486
0.746322	0.840043	0.994336
0.746601	0.902462	0.991228
0.747956	0.973596	0.988229
0.748918	0.825527	0.995291
0.749007	0.867689	0.993055
0.750814	0.757969	0.999535
1.26849	1.61858	0.988974
1.27165	1.49369	0.992414
1.27512	1.61214	0.989343
1.27538	1.60732	0.989471
1.27632	1.55783	0.990784
1.27961	1.67035	0.988079
1.28057	1.60281	0.98975
1.28337	1.50128	0.992594
1.28455	1.54581	0.99138
1.28723	1.51399	0.992359
1.28807	1.52474	0.992082
1.29046	1.59482	0.99027
1.29087	1.54304	0.991665
1.29264	1.48665	0.993341
1.29371	1.60874	0.990017
1.29556	1.61017	0.99004
1.29601	1.57466	0.990977
1.29646	1.56909	0.99114
1.29663	1.60305	0.990255
1.298	1.54728	0.991784
1.29929	1.53144	0.992268
1.29967	1.54086	0.992017
1.30203	1.62863	0.989779
1.30208	1.51405	0.992859
1.30211	1.45404	0.994668
1.30242	1.54216	0.992072
1.30274	1.49463	0.99345
1.30351	1.57236	0.991282
1.30547	1.54156	0.99219
1.30808	1.58298	0.991146
1.30957	1.63822	0.989775
1.30961	1.50156	0.993479
1.31029	1.56051	0.991824
1.31105	1.54582	0.992255
1.31179	1.56528	0.991743
1.31195	1.53966	0.992458
1.31219	1.54309	0.99237
1.31233	1.61006	0.990574
1.31236	1.65329	0.989491
1.31257	1.65807	0.989381
1.31279	1.68839	0.988665
1.31281	1.49843	0.993681
1.3135	1.56424	0.991827
1.31352	1.50632	0.993472
1.31398	1.62125	0.99034
1.31455	1.59084	0.991146
1.31484	1.60005	0.990914
1.315	1.61709	0.990478
1.315	1.63898	0.989926
1.31524	1.50677	0.993517
1.3157	1.51969	0.993154
1.31695	1.53105	0.992869
1.31768	1.64799	0.989785
1.31969	1.48465	0.994332
1.32006	1.56184	0.992108
1.32031	1.58179	0.991573
1.32082	1.69903	0.988658
1.32184	1.51828	0.993402
1.32246	1.60052	0.991144
1.32257	1.62559	0.990499
1.32278	1.5086	0.993718
1.32325	1.56717	0.992065
1.32372	1.58717	0.991538
1.32388	1.53848	0.992888
1.32611	1.56408	0.992243
1.32638	1.47187	0.994958
1.32638	1.52948	0.993229
1.32672	1.56999	0.992101
1.32724	1.64395	0.990182
1.32739	1.50004	0.99413
1.32765	1.48051	0.994734
1.32787	1.71741	0.988445
1.32815	1.58747	0.991673
1.32873	1.64716	0.990148
1.32877	1.67159	0.98955
1.32901	1.63115	0.99056
1.32932	1.5673	0.992259
1.32977	1.56199	0.992421
1.33079	1.5836	0.991862
1.33496	1.68076	0.989517
1.33519	1.51871	0.993839
1.33523	1.65414	0.990176
1.33586	1.65818	0.990095
1.33712	1.53112	0.99354
1.3389	1.63422	0.990791
1.33934	1.61642	0.991264
1.33982	1.46944	0.995502
1.34117	1.66734	0.990033
1.34118	1.60568	0.991605
1.34238	1.68367	0.989672
1.34321	1.60522	0.991681
1.349	1.54341	0.99358
1.34912	1.55824	0.99316
1.35269	1.5534	0.993415
1.35483	1.5363	0.99398
1.35749	1.62088	0.99172
1.35757	1.61131	0.991976
1.35759	1.5077	0.994926
1.35945	1.54791	0.993796
1.36017	1.59359	0.992536
1.36021	1.58194	0.992858
1.36023	1.45217	0.996775
1.36068	1.52235	0.994589
1.36194	1.55976	0.993537
1.36334	1.61195	0.992142
1.36558	1.48823	0.995802
1.36607	1.65259	0.991167
1.36666	1.52176	0.994807
1.37048	1.62873	0.991922
1.37093	1.48395	0.996121
1.37214	1.58908	0.993045
1.37223	1.59036	0.993012
1.37246	1.54712	0.994249
1.37426	1.65956	0.991243
1.3755	1.42314	0.9983
1.37597	1.63604	0.991902
1.37615	1.44751	0.997492
1.37777	1.50479	0.995701
1.37951	1.35192	1.00105
1.37958	1.64781	0.991709
1.37961	1.53046	0.99498
1.38427	1.64076	0.992038
1.38554	1.48515	0.996587
1.38672	1.53242	0.995159
1.38674	1.4929	0.996381
1.38984	1.51703	0.995732
1.39095	1.49774	0.996372
1.39182	1.62937	0.992575
1.39194	1.50768	0.996093
1.39333	1.51702	0.99585
1.39392	1.45536	0.997856
1.39557	1.51841	0.995883
1.39628	1.55089	0.994925
1.39739	1.49887	0.996556
1.40078	1.48601	0.997085
1.40106	1.43742	0.998721
1.40201	1.5641	0.994724
1.40575	1.55186	0.995209
1.40828	1.52639	0.996064
1.40906	1.6226	0.9933
1.41562	1.48333	0.997685
1.42368	1.52564	0.996605
1.96119	2.36586	0.991255
1.97552	2.37711	0.991363
1.98591	2.323	0.992578
1.98755	2.32537	0.99257
1.99404	2.25179	0.994141
1.9977	2.39396	0.991539
2.00855	2.26835	0.99414
2.00974	2.35733	0.992461
2.01119	2.36518	0.992348
2.01584	2.4614	0.990751
2.01695	2.52776	0.989678
2.01817	2.3762	0.992297
2.02032	2.35447	0.992744
2.02282	2.40815	0.991822
2.02756	2.36209	0.992759
2.02819	2.37902	0.992461
2.03352	2.39479	0.992289
2.03617	2.40651	0.992135
2.03703	2.35361	0.993123
2.03923	2.35148	0.993211
2.03931	2.42782	0.991822
2.03932	2.3939	0.992429
2.03952	2.42028	0.99196
2.04494	2.45336	0.991494
2.0457	2.38717	0.992688
2.04735	2.41569	0.992207
2.0482	2.38579	0.992767
2.04855	2.4342	0.991904
2.0488	2.40269	0.992472
2.05368	2.35946	0.993375
2.05414	2.2941	0.99465
2.0549	2.34259	0.993721
2.05801	2.49612	0.991034
2.05913	2.39874	0.992764
2.05946	2.40128	0.992725
2.06073	2.46133	0.991684
2.06111	2.39582	0.99286
2.06175	2.36037	0.993533
2.0644	2.41384	0.992602
2.06838	2.37953	0.993317
2.07093	2.42928	0.992463
2.07407	2.33634	0.994261
2.07448	2.49834	0.991334
2.07456	2.47243	0.991779
2.07619	2.42121	0.992719
2.07809	2.4642	0.991995
2.07839	2.51576	0.99112
2.0784	2.47789	0.991764
2.07917	2.43391	0.992553
2.08236	2.48368	0.991746
2.08354	2.49901	0.991508
2.08605	2.45856	0.99226
2.09259	2.51999	0.991338
2.09273	2.4518	0.992518
2.1007	2.36159	0.994354
2.10201	2.40157	0.993627
2.10202	2.48637	0.992104
2.10458	2.42432	0.993262
2.10759	2.49642	0.992045
2.11025	2.45997	0.992738
2.11108	2.43963	0.99312
2.1122	2.47291	0.99255
2.11687	2.40935	0.993798
2.11832	2.48862	0.9924
2.12673	2.4906	0.992539
2.12788	2.47148	0.9929
2.13091	2.48802	0.99267
2.13999	2.39716	0.99452
2.14798	2.54835	0.991979
2.18716	2.60755	0.991772
2.1912	2.56081	0.992633
2.19358	2.60789	0.991892
2.20145	2.60016	0.992175
2.20232	2.63703	0.991588
2.20874	2.57729	0.992703
2.22849	2.55483	0.993483
2.24546	2.5399	0.994087
2.42355	1.32352	1.04249
2.68858	1.48356	1.0416
2.69486	2.83473	0.997478
2.69763	2.59083	1.00209
2.70151	3.1432	0.99284
2.70939	3.871	0.984738
2.71004	3.30389	0.990847
2.71886	3.30684	0.990946
2.71966	2.59372	1.00247
2.72171	3.63525	0.987213
2.72188	2.90513	0.996781
2.72272	2.8995	0.996888
2.72311	3.85637	0.985054
2.72334	2.97991	0.995609
2.72458	2.78878	0.998821
2.72868	1.57702	1.03739
2.72881	3.82543	0.985419
2.72938	3.51366	0.98864
2.72967	2.72758	1.00003
2.73089	3.8992	0.984762
2.73112	4.00321	0.983842
2.73236	3.81441	0.985571
2.73323	3.05669	0.994607
2.73779	3.06518	0.994557
2.74068	3.41507	0.989947
2.74111	3.19682	0.992739
2.74132	2.14346	1.01424
2.74192	3.00519	0.995534
2.74198	3.12075	0.993816
2.74239	3.4675	0.989356
2.74293	2.96525	0.996177
2.74396	3.54361	0.988516
2.74502	2.20177	1.01259
2.74513	3.50081	0.989014
2.74519	3.09534	0.994236
2.74527	3.50603	0.988957
2.74585	2.71316	1.00061
2.74608	3.52049	0.988805
2.74649	3.9151	0.984821
2.74658	2.83752	0.998363
2.74758	2.89589	0.997387
2.7478	3.66157	0.987303
2.74798	3.6105	0.987844
2.74926	3.54578	0.988568
2.75062	3.10905	0.994126
2.75107	4.20618	0.982415
2.7547	2.95697	0.996512
2.75521	3.14187	0.993731
2.7559	2.914	0.997233
2.75591	4.02691	0.983952
2.75711	3.07831	0.994683
2.75753	2.19727	1.01302
2.7578	3.2745	0.991965
2.75819	2.73067	1.00051
2.75886	3.4888	0.989352
2.75904	3.16642	0.993447
2.75962	3.08437	0.994635
2.75985	2.75189	1.00014
2.76012	1.54206	1.04047
2.76044	2.81205	0.999062
2.76082	3.42461	0.990134
2.76116	3.26634	0.992124
2.76126	1.36369	1.05258
2.7615	3.70739	0.98702
2.76151	2.95035	0.996737
2.76273	3.49646	0.98932
2.76276	3.68345	0.987284
2.7629	2.76227	1.00001
2.76296	3.28807	0.991868
2.76303	3.37719	0.990742
2.76502	3.19721	0.993115
2.76539	4.0024	0.984285
2.76542	3.39607	0.990547
2.76559	3.80401	0.986115
2.76599	3.48656	0.989482
2.76631	2.6049	1.00316
2.76661	3.75478	0.986613
2.76732	3.03585	0.995493
2.76742	2.73025	1.00069
2.76755	3.53641	0.988936
2.76778	3.62627	0.987955
2.76779	2.97648	0.996426
2.76917	3.33074	0.991416
2.77029	3.39372	0.990649
2.77077	3.06329	0.995135
2.77083	3.86695	0.985584
2.77103	3.61628	0.988107
2.77134	3.14777	0.993909
2.7716	2.34192	1.00936
2.77163	2.95228	0.996881
2.77281	3.42273	0.990335
2.77285	2.74738	1.00047
2.77321	3.54306	0.988943
2.77343	3.4217	0.990357
2.77373	3.90902	0.98523
2.77385	2.93122	0.997263
2.77426	1.06393	1.08274
2.77534	2.84744	0.998708
2.77535	3.62095	0.988118
2.77545	3.24645	0.992612
2.77602	4.09887	0.983592
2.77655	2.94553	0.997076
2.7769	2.9751	0.996605
2.77784	3.35715	0.991216
2.77784	2.83091	0.999043
2.77819	1.7663	1.02931
2.77864	3.3196	0.991704
2.77868	2.9106	0.997689
2.77869	3.49863	0.989528
2.78018	3.19162	0.993435
2.7804	2.81043	0.999454
2.78089	3.02329	0.995915
2.78094	3.23843	0.992807
2.78145	3.79899	0.986376
2.78157	3.04558	0.995584
2.78235	2.97039	0.996774
2.78298	2.81064	0.999497
2.78361	2.80147	0.999674
2.78427	2.46082	1.0067
2.78445	3.09086	0.99495
2.7855	2.59259	1.00379
2.78578	2.94219	0.997291
2.78623	3.67452	0.987702
2.78708	2.81274	0.999534
2.7874	3.29202	0.992196
2.78746	3.16385	0.993941
2.78762	2.00965	1.01978
2.78784	3.88291	0.985657
2.7883	3.39013	0.990964
2.78848	3.23971	0.992908
2.78898	3.48427	0.989845
2.7896	3.96563	0.98492
2.78966	2.95711	0.997115
2.7897	3.02616	0.996019
2.79	3.94981	0.985068
2.79068	3.31931	0.991892
2.79127	3.51209	0.989556
2.79128	3.5575	0.98904
2.7917	3.5789	0.988808
2.79211	3.66834	0.987848
2.79216	3.35244	0.991493
2.79231	2.88042	0.998441
2.79276	2.73697	1.00104
2.79284	3.68154	0.98772
2.79305	3.93262	0.985264
2.7933	2.67984	1.00216
2.79375	3.32919	0.991813
2.79433	3.25437	0.992803
2.79564	3.93953	0.985235
2.79579	2.87835	0.998538
2.79607	2.91323	0.997951
2.79646	2.84521	0.999127
2.79711	3.25456	0.992844
2.79805	3.47252	0.990115
2.79806	3.71138	0.987482
2.79898	3.11052	0.994899
2.7991	3.3667	0.991418
2.79939	3.44906	0.990414
2.79939	3.39698	0.991046
2.79952	3.26625	0.992725
2.79954	3.3854	0.991192
2.79963	3.07794	0.995395
2.79979	2.74914	1.00094
2.80021	1.23415	1.06521
2.80044	3.19487	0.993714
2.80045	2.51593	1.00577
2.80058	3.96087	0.985104
2.80107	2.39886	1.00856
2.80112	4.05746	0.984257
2.80117	2.89649	0.998323
2.8012	3.05441	0.995778
2.80124	3.67275	0.987928
2.8016	3.62509	0.988443
2.80162	2.786	1.00029
2.80214	4.17364	0.983295
2.80246	3.94408	0.985281
2.80281	2.93924	0.997636
2.80387	2.36638	1.00944
2.8043	2.57041	1.00464
2.8043	3.355	0.991645
2.80474	2.49721	1.00628
2.80556	3.05065	0.995908
2.80578	2.8624	0.998993
2.80601	2.56311	1.00483
2.80627	3.26934	0.992789
2.80853	2.8243	0.999717
2.80871	4.2466	0.982789
2.80906	2.60745	1.00394
2.81013	3.47298	0.990287
2.81021	3.74423	0.987311
2.81036	3.4544	0.990512
2.8108	3.51219	0.989838
2.8111	3.1312	0.994795
2.81203	3.73853	0.987394
2.81207	3.33856	0.991973
2.81245	2.54567	1.00535
2.81337	3.20798	0.993737
2.81418	4.06042	0.984395
2.81427	3.51746	0.989827
2.81451	3.51512	0.989858
2.81482	3.01779	0.996575
2.81738	2.88223	0.998855
2.81786	3.72288	0.987634
2.81883	3.46742	0.990481
2.8196	2.78957	1.00055
2.8202	3.79879	0.986898
2.82021	3.581	0.989191
2.82081	3.24919	0.993288
2.8213	2.05965	1.0189
2.82297	2.69884	1.00235
2.82617	3.21003	0.993913
2.82653	3.23199	0.993614
2.8267	3.0163	0.9968
2.82759	3.71796	0.987819
2.82933	2.78724	1.00077
2.83044	1.97413	1.02218
2.83081	2.46027	1.00769
2.83086	3.05585	0.996252
2.83181	2.98944	0.997316
2.83268	3.82175	0.986838
2.83451	3.79188	0.987159
2.83474	3.76594	0.987423
2.83685	1.85323	1.02716
2.83689	3.81046	0.987006
2.84255	2.65507	1.00361
2.84273	3.47328	0.990763
2.84335	2.76082	1.00153
2.84356	3.54285	0.989958
2.85002	3.3573	0.992311
2.85095	3.65889	0.988767
2.85261	4.15655	0.984053
2.85305	3.14048	0.995342
2.85402	2.29853	1.01235
2.86089	3.75707	0.987868
2.87406	3.49446	0.990968
2.92666	3.80977	0.988213
4.08914	3.90307	1.00243
4.09127	3.78302	1.00416
4.09766	4.2264	0.99844
4.09792	5.58816	0.986415
4.1003	4.31979	0.997402
4.10509	4.26337	0.9981
4.10686	4.58271	0.994699
4.11637	4.6338	0.9943
4.11865	4.02856	1.00114
4.12258	4.88326	0.992054
4.14191	5.17227	0.989845
4.14479	4.71097	0.993868
4.14939	4.69973	0.994025
4.15247	5.19605	0.989762
4.15519	5.16208	0.990057
4.15734	4.64427	0.99465
4.16428	5.72495	0.986115
4.17175	4.89732	0.992444
4.17243	4.98482	0.99169
4.18298	5.18139	0.990178
4.18831	3.91937	1.00351
4.18994	4.87186	0.992862
4.20903	5.2961	0.98954
4.20959	4.9182	0.992653
4.21269	4.71882	0.994529
4.21574	5.28147	0.989716
8.13553	9.89724	0.9909
8.1612	9.70444	0.991868
8.1722	9.98148	0.990734
8.18036	9.64482	0.992235
8.19377	9.59805	0.992517
8.20243	10.1136	0.990342
8.20796	8.90671	0.995984
8.20832	10.8672	0.987505
8.20844	9.73529	0.99198
8.21018	8.55782	0.997919
8.23647	10.2717	0.989875
8.23707	9.37121	0.993809
8.24033	10.9228	0.987458
8.24791	9.59361	0.992827
8.25112	9.72156	0.992266
8.25221	9.57284	0.992945
8.25375	10.7118	0.988279
8.25568	9.33045	0.994107
8.25873	9.43828	0.993608
8.26057	9.78653	0.992028
8.2689	8.94884	0.996111
8.27063	9.8579	0.991768
8.2718	9.05805	0.995558
8.28011	9.71724	0.992438
8.28182	11.5112	0.985681
8.28628	10.6157	0.988791
8.29922	9.89782	0.991744
8.30942	10.0262	0.991248
8.31303	9.81559	0.992174
8.3147	10.1968	0.990567
8.3154	10.0255	0.991282
8.31812	9.55708	0.993371
8.31994	9.37775	0.994231
8.32092	9.41103	0.994076
8.32308	8.94055	0.996466
8.32438	10.275	0.990299
8.32864	9.07837	0.995775
8.32917	9.53688	0.993524
8.33254	9.82718	0.992225
8.33482	9.96413	0.991642
8.35475	9.67203	0.993037
8.3646	9.50268	0.993876
8.37868	10.1355	0.991142
8.39152	9.92041	0.992123
8.41196	9.42441	0.994507
8.41455	8.7705	0.997925
8.4268	9.7548	0.993041
13.7293	18.2906	0.98721
13.7655	13.7873	0.999913
13.7927	10.3072	1.01752
13.825	15.4347	0.994634
13.8622	10.5782	1.01608
13.8692	8.64781	1.03144
13.9422	7.98775	1.03891
13.9582	16.5162	0.992042
14.0411	12.7105	1.0054
14.0762	12.825	1.00503
14.0848	12.4125	1.00696
14.0937	17.6444	0.989671
14.1382	5.23767	1.09013
14.1428	17.5966	0.989925
14.1509	13.4694	1.00261
14.1535	13.5809	1.00217
14.1604	16.6444	0.992332
14.1618	12.1299	1.00866
14.173	12.2905	1.00791
14.1779	15.9736	0.99422
14.1802	10.303	1.01952
14.1988	18.7575	0.987536
14.201	17.9149	0.989361
14.2014	12.5826	1.00664
14.2064	12.4401	1.00733
14.2155	13.4611	1.00289
14.2254	20.0898	0.985044
14.2398	12.8042	1.00579
14.2534	17.9407	0.989453
14.2583	19.5495	0.986128
14.2617	12.7561	1.00609
14.2701	17.4298	0.990693
14.2761	15.7114	0.995302
14.2804	11.5448	1.01226
14.2809	15.7803	0.995114
14.2816	4.98286	1.09927
14.2819	10.4878	1.01876
14.2993	16.7088	0.992591
14.3044	13.1605	1.00449
14.3056	10.8781	1.01633
14.312	8.58477	1.03479
14.3135	14.5558	0.999144
14.328	17.5602	0.990551
14.335	14.9403	0.997915
14.3491	19.308	0.986833
14.3618	18.0533	0.989507
14.3676	18.6283	0.988268
14.3748	16.0652	0.994591
14.3759	18.1339	0.989366
14.384	6.86959	1.05746
14.3841	11.7849	1.01141
14.3901	9.32367	1.02828
14.3916	13.6329	1.00287
14.394	17.169	0.9917
14.3981	15.1018	0.997603
14.4033	15.5758	0.996129
14.4071	16.5219	0.993423
14.416	11.7224	1.01189
14.4249	5.89421	1.07648
14.4351	14.6861	0.999122
14.4375	11.2824	1.01449
14.4377	20.1225	0.985524
14.4425	13.0992	1.0053
14.4504	15.5382	0.9964
14.454	6.84718	1.05838
14.4542	19.3644	0.987001
14.4551	16.4164	0.993861
14.4625	12.9522	1.00602
14.4684	22.5655	0.981641
14.4714	16.0104	0.995059
14.4745	19.5444	0.986703
14.4778	18.9963	0.987802
14.4784	16.9622	0.992479
14.479	13.7554	1.00272
14.4813	11.9969	1.01071
14.4901	17.5603	0.991024
14.4918	20.9058	0.984287
14.4932	15.7975	0.995756
14.5053	16.8941	0.992737
14.508	18.1972	0.989597
14.5287	17.7669	0.990645
14.5364	9.63398	1.02647
14.5374	15.0997	0.998086
14.5492	15.3618	0.997281
14.5553	15.8962	0.995664
14.5656	16.3702	0.994335
14.5697	13.0157	1.00617
14.5723	14.5825	0.999968
14.573	21.7956	0.983037
14.5758	15.6606	0.996439
14.5834	14.7614	0.999383
14.5894	17.3874	0.991737
14.5926	14.22	1.00136
14.6099	20.5825	0.985135
14.62	21.0459	0.984363
14.6403	18.9254	0.988388
14.6621	17.0381	0.992838
14.6801	15.894	0.996075
14.7023	23.139	0.981348
14.7205	21.9101	0.983202
14.7211	19.0891	0.988265
14.749	15.0045	0.999129
29.4703	35.539	0.991196
32.1596	42.0952	0.987862
32.2299	38.8169	0.991258
32.6026	32.4041	1.00031
32.6151	33.23	0.999039
32.7154	28.4212	1.00783
32.7397	35.8402	0.995534
32.795	32.4057	1.00062
32.8157	35.5657	0.996007
32.8362	32.4131	1.00067
32.8805	34.631	0.997387
32.9085	33.3508	0.999311
32.937	36.4497	0.995027
32.9559	35.8698	0.995806
32.9739	40.7717	0.990155
32.9924	38.9607	0.992108
33.0037	34.3332	0.997997
33.0213	30.5809	1.00413
33.0476	33.443	0.999386
33.0576	39.9445	0.991121
33.0588	37.4463	0.993958
33.0902	36.3427	0.995381
33.1248	39.9239	0.99123
33.1408	39.2387	0.991994
33.1453	33.2097	0.999897
33.1494	48.2094	0.983967
33.1553	36.1079	0.995779
33.1618	38.0625	0.993363
33.1625	35.4965	0.996604
33.1644	34.362	0.998198
33.1682	38.7771	0.992546
33.1731	37.0046	0.994659
33.1762	35.6897	0.996364
33.1864	42.0159	0.989188
33.196	36.7405	0.995023
33.203	33.0045	1.00031
33.208	37.9539	0.993553
33.2086	31.2911	1.00317
33.2164	32.7112	1.0008
33.2186	33.9153	0.998937
33.2213	33.8445	0.999046
33.2253	33.6871	0.999289
33.24	37.8623	0.993706
33.2435	38.4421	0.99303
33.2695	33.7185	0.99931
33.2716	33.9945	0.998899
33.286	40.713	0.990609
33.2979	34.5384	0.998143
33.305	45.1367	0.986531
33.3104	36.7193	0.99521
33.3276	31.2145	1.0035
33.336	32.6006	1.00116
33.3432	38.4071	0.993204
33.3442	34.7017	0.997978
33.3533	34.8008	0.997851
33.3537	31.45	1.00313
33.3663	36.5345	0.995525
33.3668	37.8671	0.993873
33.3982	37.9532	0.993812
33.4149	27.8975	1.01026
33.4156	34.0096	0.999096
33.4415	38.6104	0.9931
33.4489	38.7196	0.992985
33.4575	39.9427	0.991638
33.4966	34.3499	0.998716
33.4997	40.6105	0.990985
33.5067	40.7506	0.990848
33.5114	39.277	0.992437
33.5208	33.7624	0.999629
33.5262	39.213	0.992528
33.5309	35.1351	0.997642
33.5467	38.1837	0.99374
33.5509	41.9127	0.989734
33.5618	33.8988	0.999485
33.5645	37.0206	0.995184
33.5648	44.1925	0.987637
33.5692	38.6904	0.993178
33.5888	37.0781	0.995146
33.594	35.8109	0.996804
33.6022	42.9669	0.98879
33.6248	38.3974	0.993593
33.6253	43.7856	0.988069
33.6279	38.4211	0.99357
33.6327	34.3815	0.998874
33.6392	38.8977	0.993034
33.6415	33.0038	1.001
33.6498	39.1299	0.992784
33.653	35.1059	0.997863
33.6578	35.8539	0.996838
33.6778	38.7968	0.9932
33.682	39.3697	0.992557
33.6856	41.0823	0.990732
33.6905	39.6994	0.992203
33.6914	30.9629	1.00456
33.6957	30.5956	1.00525
33.7078	33.9595	0.999617
33.7156	36.987	0.995437
33.723	35.0625	0.998027
33.7251	34.4413	0.998926
33.7389	40.5622	0.991338
33.7468	35.0504	0.998079
33.7534	36.6324	0.995945
33.7564	36.4143	0.996234
33.7714	32.2994	1.00236
33.8087	36.7866	0.995824
33.8126	35.4143	0.997665
33.8274	35.7897	0.99717
33.8316	39.6928	0.992393
33.8322	41.3162	0.990676
33.8451	29.8373	1.00696
33.8573	36.7597	0.995926
33.8586	39.4599	0.992687
33.8714	35.1786	0.998081
33.8745	40.087	0.992018
33.8883	35.999	0.996974
33.9103	34.0019	0.999861
33.9106	38.5567	0.993789
33.9138	38.3279	0.994063
33.9161	43.2106	0.988937
33.9206	36.4091	0.996473
33.9377	39.4509	0.9928
33.9389	31.894	1.00332
33.9414	36.0851	0.996934
33.9509	44.4127	0.98789
33.954	39.2672	0.993028
33.9603	37.5151	0.995113
33.9751	35.0787	0.998376
33.9866	34.517	0.999207
33.9875	39.0095	0.993366
34.0263	35.4173	0.997973
34.0602	44.9873	0.987515
34.0603	37.8575	0.994828
34.0644	38.3572	0.994231
34.0986	35.9833	0.997297
34.0998	38.8187	0.993735
34.1085	34.8396	0.998917
34.1284	34.4583	0.999507
34.1473	35.0404	0.998685
34.1562	36.9914	0.996047
34.1783	42.6836	0.989748
34.1797	34.3203	0.99979
34.1946	35.1347	0.99862
34.2021	34.2016	1
34.2573	36.2728	0.997133
34.2576	44.6614	0.988024
34.3211	36.1268	0.997422
34.3268	41.5307	0.991071
34.3456	42.5577	0.990071
34.3502	33.2249	1.00175
34.3835	42.3075	0.990362
34.3935	41.189	0.991506
34.4302	40.2185	0.992587
34.4944	41.6486	0.991158
34.5092	35.7053	0.998273
34.5122	44.5371	0.988427
34.7782	38.065	0.995549
63.9053	67.3121	0.997379
64.4788	66.7231	0.998257
64.6311	67.4634	0.997826
64.8046	66.3795	0.99877
64.9061	61.9721	1.00245
64.9077	68.2879	0.997438
64.9245	67.3096	0.998164
64.9382	62.3515	1.00215
64.9858	67.6813	0.997938
65.0634	68.7077	0.997255
65.1678	69.9657	0.996453
65.2013	65.8055	0.999523
65.2808	64.9107	1.00029
65.3394	72.2869	0.995033
65.3471	69.6454	0.996807
65.3877	61.2504	1.0035
65.3878	68.1816	0.997879
65.4781	66.0097	0.999582
65.4883	67.2289	0.998659
65.5095	65.9619	0.999644
65.5248	67.9315	0.998166
65.5266	70.1594	0.996585
65.5798	66.4245	0.999341
65.601	65.4493	1.00012
65.619	63.8448	1.00144
65.6289	69.1743	0.997348
65.6642	66.5379	0.999319
65.7108	69.7754	0.996987
65.7185	66.7289	0.999215
65.7904	68.7585	0.997766
65.8186	68.7103	0.997822
65.8282	64.8743	1.00076
65.8639	68.7769	0.997808
65.9107	67.4159	0.998844
65.9267	68.2869	0.998211
65.9267	63.87	1.00167
65.9349	66.1918	0.999799
65.9728	68.8845	0.997813
66.0508	67.8246	0.998646
66.0974	69.7593	0.997285
66.1122	64.1444	1.00159
66.1199	68.488	0.998211
66.1342	64.345	1.00144
66.1393	68.0301	0.998562
66.1539	64.1032	1.00166
66.1718	67.05	0.999322
66.3375	70.1403	0.997196
66.377	68.7237	0.998233
66.3854	66.9748	0.999545
66.3948	72.6978	0.99552
66.4322	66.9908	0.999569
66.4339	67.7172	0.99902
66.436	66.1728	1.00021
66.4652	69.6551	0.997631
66.5277	66.4213	1.00008
66.5357	69.009	0.998146
66.5656	71.0543	0.996734
66.6206	67.347	0.999442
66.6454	67.028	0.999705
66.6536	69.7258	0.997721
66.6726	69.6666	0.997777
66.6773	70.829	0.996969
66.6839	68.0006	0.998999
66.7092	68.1605	0.998899
66.714	71.265	0.996699
66.7171	70.8048	0.997015
66.7467	68.7659	0.998481
66.8257	69.4449	0.99805
66.851	63.8736	1.00242
66.8643	68.7558	0.998577
66.8883	68.3706	0.998879
66.9006	67.6241	0.999447
66.9025	66.8366	1.00005
67.0126	66.4667	1.00043
67.0236	72.4989	0.996097
67.026	72.1667	0.996318
67.1083	63.9245	1.00258
67.1179	71.0118	0.997165
67.166	68.6871	0.998855
67.268	67.632	0.999723
67.3335	69.2338	0.998581
67.4387	69.2785	0.998628
67.4447	68.7243	0.999038
67.4863	69.4654	0.998528
67.4934	65.9978	1.00118
67.5421	65.985	1.00123
67.5432	68.9938	0.998914
67.5724	67.5017	1.00006
67.5841	69.0648	0.998893
67.5939	71.2208	0.997368
67.6206	69.0979	0.998896
67.6662	68.3566	0.99948
67.6752	68.4039	0.999451
67.7299	66.7856	1.00074
67.8483	71.0716	0.997656
67.8762	71.917	0.997097
67.9124	68.8914	0.999267
67.9175	68.2294	0.999766
68.0356	68.9088	0.999347
68.0361	66.3079	1.00135
68.088	70.0233	0.998573
68.3057	71.7586	0.997514
68.3693	70.3604	0.998539
68.4127	69.1915	0.999421
68.4311	75.279	0.995302
68.4494	69.7533	0.999036
68.4599	71.238	0.997986
68.6118	70.7049	0.998472
68.843	69.7078	0.999362
68.8538	69.9127	0.99922
70.0309	71.3162	0.999073
71.4935	73.6306	0.998506
108.564	116.377	0.99652
109.706	118.609	0.996111
110.585	124.82	0.9941
110.678	108.633	1.00097
110.689	121.042	0.995571
110.734	121.871	0.995269
110.762	122.48	0.995048
110.807	113.701	0.998678
110.836	122.677	0.995004
110.949	121.344	0.995564
110.991	113.374	0.99891
111.037	122.243	0.995255
111.082	127.931	0.993207
111.104	133.268	0.99143
111.121	119.655	0.996305
111.139	122.381	0.995245
111.197	108.905	1.00109
111.248	137.579	0.990144
111.311	125.101	0.994297
111.326	125.384	0.9942
111.378	122.253	0.995395
111.451	99.3317	1.00632
111.563	121.752	0.995667
111.637	126.614	0.993882
111.679	76.959	1.02356
111.68	84.5712	1.01669
111.696	123.976	0.994874
111.712	123.708	0.994982
111.732	128.373	0.993314
111.737	125.151	0.994455
111.743	122.815	0.995333
111.752	119.406	0.996688
111.773	108.739	1.00144
111.789	122.635	0.995422
111.795	102.59	1.00465
111.825	119.266	0.996776
111.834	125.368	0.994415
111.909	121.996	0.995719
111.939	134.548	0.991342
111.964	110.216	1.00082
111.986	124.88	0.994658
111.99	124.068	0.994975
112.001	124.697	0.994731
112.021	123.484	0.995195
112.03	98.386	1.00719
112.087	95.2417	1.00918
112.108	123.091	0.995381
112.13	122.647	0.995561
112.194	123.837	0.995134
112.195	126.035	0.99432
112.23	126.952	0.994002
112.233	121.144	0.996191
112.324	122.609	0.995657
112.341	108.764	1.0017
112.384	83.3383	1.01816
112.46	119.218	0.997071
112.46	125.282	0.994705
112.473	123.757	0.995281
112.494	124.811	0.994893
112.523	123.888	0.995252
112.542	108.637	1.00186
112.552	124.351	0.995089
112.576	104.938	1.00377
112.577	123.772	0.995318
112.58	123.355	0.995479
112.619	121.125	0.996363
112.691	124.049	0.995261
112.712	86.4299	1.01583
112.726	88.8838	1.01395
112.738	104.892	1.00387
112.82	112.908	0.999958
112.832	124.367	0.9952
112.863	126.013	0.994601
112.866	123.231	0.995646
112.869	126.391	0.994466
112.894	124.744	0.995084
112.934	124.836	0.995066
112.953	93.0301	1.01113
112.984	113.69	0.999678
112.995	128.106	0.9939
113.032	101.874	1.00568
113.079	122.864	0.995877
113.098	126.783	0.994431
113.106	118.146	0.997795
113.143	127.177	0.994292
113.161	122.689	0.995979
113.185	113.231	0.999978
113.196	122.944	0.995895
113.204	119.628	0.997218
113.22	126.635	0.99452
113.237	109.315	1.00186
113.304	122.964	0.995933
113.305	123.927	0.995564
113.31	97.9145	1.00816
113.32	121.854	0.996374
113.327	96.352	1.00915
113.343	114.238	0.999594
113.349	116.19	0.998735
113.36	126.1	0.994773
113.366	121.94	0.996359
113.399	125.977	0.994834
113.419	111.686	1.0008
113.423	124.102	0.995546
113.432	72.0637	1.03007
113.448	125.013	0.995213
113.456	108.951	1.00214
113.474	124.757	0.99532
113.476	128.674	0.993892
113.5	125.457	0.995069
113.505	96.091	1.00941
113.527	124.228	0.995541
113.553	123.194	0.995949
113.593	85.8644	1.01682
113.626	127.853	0.994245
113.628	121.76	0.996549
113.633	125.09	0.995261
113.64	97.7192	1.00846
113.676	96.2115	1.00943
113.712	92.8436	1.01168
113.713	124.885	0.99537
113.722	128.124	0.994187
113.722	122.704	0.99621
113.752	95.718	1.00979
113.773	126.541	0.99478
113.782	111.601	1.00101
113.819	124.155	0.995691
113.839	123.612	0.995918
113.852	124.804	0.995459
113.862	109.4	1.00211
113.891	126.693	0.994772
113.896	125.043	0.995387
113.936	125.909	0.99508
113.944	114.187	0.99989
114.022	136.312	0.991572
114.028	99.1673	1.00778
114.101	117.832	0.998364
114.102	128.528	0.994195
114.117	119.709	0.997587
114.123	118.188	0.998223
114.124	127.594	0.99454
114.16	105.04	1.0045
114.189	123.537	0.996094
114.194	122.189	0.996621
114.217	110.207	1.00188
114.248	126.432	0.995014
114.327	112.991	1.00061
114.363	119.354	0.99784
114.372	109.864	1.00212
114.443	103.095	1.00571
114.453	123.889	0.996058
114.461	109.935	1.00213
114.477	121.953	0.996826
114.518	115.426	0.999593
114.572	111.802	1.00128
114.586	125.949	0.995332
114.598	111.274	1.00155
114.668	124.963	0.995736
114.685	108.376	1.00302
114.687	124.269	0.996009
114.731	124.332	0.996003
114.787	107.596	1.00346
114.801	125.885	0.995444
114.85	128.664	0.994447
114.875	129.548	0.994143
114.895	90.2117	1.01424
114.992	125.411	0.995701
115.001	97.2219	1.0095
115.031	108.767	1.00298
115.036	126.664	0.995251
115.059	101.205	1.0071
115.168	125.796	0.995628
115.216	126.392	0.995425
115.251	132.02	0.993449
115.296	123.683	0.996498
115.307	100.417	1.0077
115.335	128.919	0.994551
115.362	124.654	0.996142
115.388	115.966	0.999744
115.418	111.311	1.00191
115.429	136.78	0.991957
115.476	112.9	1.00118
115.501	117.862	0.998966
115.64	112.485	1.00145
115.641	130.003	0.994302
115.658	117.2	0.999322
115.79	123.052	0.996952
115.799	140.71	0.990883
115.818	125.183	0.996129
115.929	109.699	1.00294
115.935	99.3479	1.00867
115.968	121.427	0.997679
116.02	106.207	1.00479
116.047	114.137	1.00087
116.089	119.056	0.998714
116.159	96.9266	1.01031
116.169	103.813	1.00617
116.179	139.442	0.991407
116.366	116.963	0.999738
116.425	105.309	1.00548
116.476	129.51	0.994795
116.51	103.702	1.00641
116.613	110.96	1.00264
116.621	98.2116	1.00974
116.633	116.331	1.00014
116.682	113.994	1.00122
116.718	119.645	0.998738
116.858	110.747	1.00286
116.931	130.465	0.994648
116.998	109.571	1.00351
117.003	107.16	1.00476
117.079	113.613	1.00158
117.095	119.926	0.998782
117.271	129.329	0.99519
117.297	111.517	1.00269
117.327	106.873	1.00507
117.35	122.801	0.997709
117.501	117.229	1.00012
117.534	123.345	0.997568
117.859	122.92	0.997876
118.012	119.118	0.999524
118.156	132.999	0.994244
118.17	109.501	1.00411
118.22	101.477	1.00857
118.411	121.214	0.998809
118.496	108.866	1.00459
118.513	100.509	1.00931
119.285	120.786	0.999363
119.532	115.295	1.00191
119.723	146.82	0.9905
119.879	133.613	0.994687
121.175	132.373	0.99564
121.22	133.798	0.995155
121.41	119.856	1.00068
122.168	113.174	1.00413
123.76	139.31	0.994233
126.753	140.382	0.995001
129.499	148.942	0.993261
170.995	203.057	0.991834
171.122	191.844	0.994414
171.28	202.09	0.992114
171.446	204.312	0.991682
171.446	204.042	0.991739
171.624	205.55	0.991466
171.679	206.351	0.991313
171.701	206.215	0.991347
171.9	203.729	0.99192
172.094	205.216	0.991654
172.105	207.301	0.991223
172.186	206.719	0.991363
172.228	205.39	0.991651
172.24	172.902	0.999796
172.272	203.402	0.992084
172.755	157.271	1.0051
172.904	205.622	0.991772
172.916	209.804	0.990928
173.116	160.03	1.00424
173.131	205.312	0.991894
173.24	208.304	0.991298
173.308	206.371	0.991716
173.352	173.467	0.999961
173.354	209.202	0.991142
173.371	208.322	0.991327
173.469	207.129	0.991597
173.615	207.859	0.991482
173.62	209.47	0.991153
173.639	206.781	0.991712
173.654	208.882	0.991281
173.669	206.732	0.99173
173.677	208.004	0.991468
173.805	179.561	0.998337
173.808	207.847	0.991533
173.838	207.57	0.991598
174.033	208.629	0.991427
174.039	206.855	0.991797
174.047	206.275	0.99192
174.106	208.937	0.991382
174.248	207.108	0.991796
174.313	207.383	0.991754
174.316	174.679	0.999888
174.327	210.602	0.991097
174.366	189.741	0.995808
174.368	229.051	0.987703
174.49	163.435	1.0035
174.53	209.001	0.991473
174.551	192.617	0.995149
174.572	164.434	1.00319
174.619	176.406	0.999471
174.725	208.253	0.991676
174.729	210.454	0.991225
174.747	169.142	1.00171
174.765	207.195	0.991906
174.791	209.749	0.991384
174.798	209.523	0.991432
174.851	198.893	0.993753
174.871	209.744	0.991405
174.909	209.835	0.991395
175.026	201.728	0.993162
175.043	185.495	0.997082
175.046	208.265	0.991753
175.101	211.385	0.991128
175.109	206.997	0.992033
175.116	182.312	0.997954
175.133	208.273	0.991772
175.162	209.625	0.991501
175.175	211.452	0.991132
175.177	163.53	1.00369
175.231	207.261	0.992008
175.233	165.718	1.00297
175.234	206.901	0.992085
175.235	207.358	0.991989
175.303	207.343	0.992009
175.313	209.68	0.991526
175.313	208.237	0.991824
175.321	185.251	0.997224
175.328	206.316	0.992232
175.331	195.084	0.994765
175.349	209.4	0.991593
175.35	208.213	0.991839
175.382	191.262	0.995704
175.383	188.49	0.996402
175.386	211.265	0.991222
175.396	204.023	0.992741
175.401	213.554	0.990783
175.409	213.582	0.990764
175.451	149.918	1.00885
175.473	209.06	0.991693
175.483	203.04	0.99299
175.495	205.844	0.992374
175.506	206.999	0.992132
175.547	166.254	1.00289
175.569	194.464	0.994976
175.594	220.069	0.989581
175.608	210.468	0.991437
175.624	210.703	0.991394
175.642	208.759	0.991797
175.644	210.417	0.991457
175.679	207.801	0.992006
175.689	211.737	0.9912
175.694	181.913	0.998228
175.708	210.849	0.991384
175.708	210.319	0.991492
175.709	208.844	0.991796
175.714	211	0.991355
175.715	177.151	0.999577
175.734	211.158	0.991328
175.736	194.921	0.994911
175.75	209.285	0.991715
175.766	209.154	0.99176
175.767	211.847	0.991197
175.768	208.259	0.991932
175.771	208.916	0.991797
175.782	162.066	1.00439
175.815	162.584	1.00422
175.872	210.413	0.991513
175.896	210.485	0.991505
175.99	163.777	1.00386
176.019	159.268	1.00546
176.022	208.462	0.991953
176.027	211.898	0.99125
176.066	181.934	0.998327
176.081	162.826	1.00422
176.109	209.646	0.991729
176.129	194.877	0.995025
176.133	209.81	0.991701
176.158	213.469	0.990967
176.201	165.49	1.00335
176.212	189.321	0.996417
176.219	147.244	1.01024
176.283	137.407	1.01475
176.313	192.787	0.99558
176.337	168.173	1.00251
176.339	212.273	0.99125
176.339	210.917	0.991525
176.343	174.979	1.0004
176.417	210.318	0.991666
176.525	210.833	0.991587
176.56	167.308	1.00286
176.566	192.728	0.995662
176.571	186.4	0.99727
176.602	179.128	0.999267
176.624	191.154	0.996068
176.678	171.798	1.00147
176.681	177.087	0.999878
176.719	210.876	0.991626
176.722	210.634	0.991676
176.783	151.948	1.00849
176.8	211.167	0.991586
176.802	197.273	0.994636
176.808	145.35	1.01126
176.83	188.877	0.996698
176.86	163.703	1.00417
176.865	211.955	0.991442
176.908	211.025	0.991641
176.937	179.138	0.999361
176.956	185.346	0.997656
176.962	158.385	1.00609
176.979	170.701	1.0019
177	189.133	0.996681
177.013	193.85	0.995508
177.021	150.8	1.00904
177.024	183.74	0.998106
177.067	151.745	1.00867
177.075	166.353	1.00334
177.078	155.126	1.00735
177.091	176.967	1.00003
177.095	167.891	1.00284
177.104	155.606	1.00718
177.121	169.232	1.00241
177.145	151.166	1.00893
177.197	162.885	1.00456
177.215	185.005	0.997819
177.359	211.912	0.991571
177.373	177.11	1.00007
177.394	182.361	0.998588
177.394	183.317	0.998326
177.42	211.185	0.991734
177.428	177.765	0.999899
177.49	172.492	1.0015
177.491	214.293	0.991124
177.52	212.247	0.991542
177.523	190.68	0.996429
177.544	212.407	0.991515
177.552	166.931	1.0033
177.56	191.03	0.996353
177.571	195.241	0.995322
177.582	200.462	0.994102
177.584	212.012	0.991605
177.597	172.782	1.00144
177.598	171.198	1.00194
177.607	213.211	0.991368
177.613	170.548	1.00214
177.624	173.989	1.00108
177.631	202.286	0.993703
177.634	164.569	1.00412
177.646	191.201	0.996332
177.656	184.492	0.998081
177.663	212.242	0.991577
177.726	178.448	0.999788
177.727	176.274	1.00042
177.805	175.016	1.00082
177.835	225.621	0.989084
177.886	214.188	0.99124
177.928	170.242	1.00234
177.954	171.012	1.0021
178.029	211.736	0.991769
178.034	194.733	0.995565
178.091	175.755	1.00069
178.157	184.888	0.998114
178.164	174.705	1.00102
178.18	177.936	1.00007
178.21	226.347	0.98904
178.219	159.04	1.00626
178.229	170.159	1.00246
178.254	166.779	1.00357
178.263	162.09	1.00518
178.271	151.559	1.00916
178.272	214.736	0.991223
178.309	158.648	1.00643
178.311	168.268	1.00309
178.313	210.819	0.992041
178.341	175.057	1.00097
178.36	186.831	0.997653
178.366	187.151	0.997569
178.381	176.064	1.00068
178.408	161.135	1.00556
178.435	211.735	0.991869
178.538	148.188	1.01066
178.541	163.556	1.00475
178.544	183.898	0.998492
178.546	169.968	1.00261
178.553	153.906	1.00832
178.57	191.638	0.996473
178.6	170.021	1.00261
178.621	187.47	0.997556
178.623	157.39	1.00701
178.649	192.192	0.996354
178.649	177.74	1.00026
178.703	185.862	0.998005
178.749	212.961	0.991695
178.75	180.34	0.999542
178.757	170.24	1.00259
178.79	216.473	0.991004
178.795	183.445	0.998687
178.804	210.03	0.992325
178.826	164.592	1.00449
178.847	216.087	0.991094
178.852	189.523	0.997087
178.878	182.378	0.999005
178.89	166.79	1.00376
178.893	174.411	1.00133
178.9	174.616	1.00127
178.911	177.101	1.00053
178.919	152.031	1.0092
178.945	173.736	1.00155
178.97	174.248	1.0014
178.993	193.601	0.996097
179.02	193.02	0.996249
179.028	144.713	1.01235
179.03	183.406	0.998764
179.047	148.457	1.01072
179.064	145.123	1.01218
179.111	154.059	1.00845
179.119	176.9	1.00065
179.136	193.958	0.996047
179.224	164.678	1.00458
179.27	179.166	1.00003
179.326	188.053	0.997598
179.363	172.196	1.00216
179.412	151.126	1.00974
179.416	176.51	1.00085
179.441	192.223	0.996561
179.46	158.109	1.00702
179.461	154.617	1.00835
179.474	191.42	0.996771
179.508	156.997	1.00745
179.518	169.011	1.00322
179.532	187.521	0.997794
179.536	185.252	0.998401
179.544	186.117	0.998171
179.551	192.369	0.996554
179.594	152.991	1.00904
179.62	195.121	0.995893
179.765	168.306	1.00353
179.766	189.238	0.997409
179.773	151.841	1.00957
179.779	198.265	0.995182
179.788	185.809	0.998322
179.792	196.299	0.995653
179.797	177.654	1.00062
179.805	166.029	1.0043
179.869	188.126	0.997729
179.872	174.569	1.00157
179.96	189.049	0.997512
179.964	164.404	1.00491
179.969	183.114	0.99911
179.988	172.574	1.00223
180.012	186.729	0.998138
180.044	148.573	1.01103
180.058	177.554	1.00073
180.062	194.032	0.996277
180.07	198.953	0.995094
180.097	161.373	1.00603
180.108	195.11	0.996023
180.113	172.615	1.00225
180.124	182.837	0.999231
180.135	170.721	1.00286
180.179	174.159	1.00179
180.19	184.503	0.99879
180.202	184.341	0.998837
180.209	169.728	1.0032
180.267	161.605	1.006
180.269	207.951	0.993128
180.297	190.627	0.997197
180.328	152.063	1.00967
180.352	170.913	1.00286
180.371	208.339	0.993068
180.403	176.186	1.00124
180.421	161.524	1.00608
180.422	152.104	1.00968
180.428	199.795	0.99499
180.462	173.24	1.00216
180.493	196.222	0.995856
180.52	190.864	0.997196
180.531	156.25	1.00808
180.533	171.35	1.00278
180.552	185.324	0.998666
180.591	191.091	0.997158
180.61	195.761	0.995999
180.618	178.548	1.0006
180.671	168.347	1.0038
180.678	170.641	1.00305
180.698	201.92	0.994571
180.723	178.083	1.00077
180.735	177.266	1.00101
180.743	183.81	0.999136
180.749	177.317	1.001
180.807	179.781	1.0003
180.859	179.628	1.00035
180.876	180.061	1.00023
180.878	163.886	1.00538
[truncated: 1,260 more rows]

## Sheet: HxWxL=0.7x1x32.5 | d=0.25
Transit time of particle Dt (sec)	Signal at antinode Df_anti (Hz)	Signal Df_max near node (Hz)	baseline frequency f (Hz)	nominal buoyant mass m_bnom (pg)	reference volume V_ref (um3)	reference diameter d_ref (um)	nominal alpha_m	nominal density rho_nom (kg/m3)	measured buoyant mass m_b (pg)	measured volume V_meas (um3)	measured diameter d_meas (um)	measured density rho_p (kg/m3)	measured alpha_m	measured alpha_v	measured beta(R/H)^2	measured beta	Signal at node Df_node(Hz)
0.53664	-8.89036	-0.96453	7550000	0.000513092	0.00968098	0.264428	0.99744	1050	0.000513216	0.010223	0.269274	1047.2	0.997178	14.3564	0.96427	26.0656	-0.975237
0.50336	-8.12079	-0.812179	7550000	0.000468677	0.00884297	0.256566	0.99744	1050	0.000468741	0.00867198	0.254902	1051.05	0.997282	15.8887	0.864088	26.0656	-0.820447
0.53792	-8.32884	-0.524897	7550000	0.000480685	0.00906953	0.258739	0.99744	1050	0.000480966	0.0056904	0.221504	1081.52	0.996834	20.6437	0.65249	26.0656	-0.52819
0.51424	-7.56787	-0.914934	7550000	0.000436767	0.00824088	0.250606	0.99744	1050	0.000436704	0.00973447	0.264914	1041.86	0.997561	14.7962	0.933298	26.0656	-0.926339
0.53088	-8.57379	-1.34195	7550000	0.000494822	0.00933626	0.261251	0.99744	1050	0.000494749	0.0140517	0.299394	1032.21	0.997565	11.8177	1.19206	26.0656	-1.3641
0.544	-8.62844	-0.879674	7550000	0.000497976	0.00939576	0.261805	0.99744	1050	0.000498094	0.00935927	0.261465	1050.22	0.99718	15.158	0.90916	26.0656	-0.888814
0.54208	-8.55565	-0.68477	7550000	0.000493775	0.0093165	0.261067	0.99744	1050	0.00049399	0.00735385	0.241271	1064.17	0.996983	17.5956	0.774145	26.0656	-0.690283
0.52896	-8.2794	-0.562814	7550000	0.000477831	0.00901568	0.258226	0.99744	1050	0.000478073	0.0060873	0.226539	1075.54	0.996913	19.7923	0.682489	26.0656	-0.566635
0.54688	-8.29769	-0.610368	7550000	0.000478887	0.0090356	0.258416	0.99744	1050	0.000479099	0.00658307	0.232529	1069.78	0.996977	18.8496	0.719059	26.0656	-0.614867
0.5536	-9.09047	-0.708072	7550000	0.000524641	0.00989888	0.266397	0.99744	1050	0.000524953	0.00759139	0.243842	1066.15	0.996824	17.2516	0.790727	26.0656	-0.713613
0.58944	-8.2491	-0.460885	7550000	0.000476082	0.00898269	0.257911	0.99744	1050	0.0004764	0.00501817	0.212414	1091.94	0.996753	22.335	0.600034	26.0656	-0.463438
0.58976	-8.20265	-0.343002	7550000	0.000473402	0.00893212	0.257426	0.99744	1050	0.000473829	0.00376884	0.19308	1122.72	0.996519	26.7486	0.495775	26.0656	-0.344413
0.58592	-8.5438	-0.734814	7550000	0.000493091	0.0093036	0.260946	0.99744	1050	0.000493273	0.0078712	0.246801	1059.67	0.99705	16.8694	0.81004	26.0656	-0.741193
0.65024	-8.83111	-1.26421	7550000	0.000509672	0.00961646	0.263839	0.99744	1050	0.000509662	0.0132616	0.293674	1035.43	0.997439	12.2419	1.14694	26.0656	-1.28313
0.64768	-8.36745	-0.597047	7550000	0.000482913	0.00911157	0.259138	0.99744	1050	0.000483149	0.00644398	0.230879	1071.98	0.996932	19.1019	0.708895	26.0656	-0.60131
0.6144	-8.20543	-0.587832	7550000	0.000473562	0.00893514	0.257455	0.99744	1050	0.000473771	0.00634877	0.229737	1071.62	0.996979	19.2801	0.701895	26.0656	-0.592047
0.63328	-8.69558	-0.93932	7550000	0.000501851	0.00946888	0.262482	0.99744	1050	0.000501952	0.00996829	0.267018	1047.35	0.997217	14.581	0.948184	26.0656	-0.9497
0.67968	-8.7748	-0.844917	7550000	0.000506422	0.00955514	0.263277	0.99744	1050	0.000506586	0.00900166	0.258092	1053.28	0.997096	15.5264	0.885851	26.0656	-0.85318
0.64704	-9.18052	-1.06605	7550000	0.000529838	0.00999695	0.267274	0.99744	1050	0.000529966	0.0112514	0.278016	1044.1	0.997178	13.536	1.0279	26.0656	-1.07878
0.64768	-8.48986	-0.788979	7550000	0.000489978	0.00924487	0.260396	0.99744	1050	0.000490119	0.00842975	0.252506	1055.14	0.997131	16.1689	0.847921	26.0656	-0.796411
0.66336	-8.58438	-1.05182	7550000	0.000495433	0.00934778	0.261359	0.99744	1050	0.000495466	0.0111159	0.276895	1041.57	0.997352	13.6372	1.01963	26.0656	-1.06512
0.61888	-8.85548	-1.0323	7550000	0.000511079	0.00964299	0.264081	0.99744	1050	0.000511165	0.0109134	0.275203	1043.84	0.99725	13.7917	1.00721	26.0656	-1.04468
0.64352	-7.67426	-0.823022	7550000	0.000442907	0.00835673	0.251775	0.99744	1050	0.000442896	0.00878861	0.25604	1047.39	0.997443	15.7585	0.871818	26.0656	-0.832046
0.6208	-8.46793	-0.783681	7550000	0.000488712	0.00922098	0.260171	0.99744	1050	0.000488852	0.00837538	0.251962	1055.37	0.997133	16.2338	0.844271	26.0656	-0.79103
0.6544	-9.0334	-0.829679	7550000	0.000521347	0.00983674	0.265838	0.99744	1050	0.00052157	0.00884306	0.256567	1055.98	0.996992	15.6975	0.875415	26.0656	-0.837398
0.4016	-8.05524	-0.656036	7550000	0.000464894	0.00877159	0.255874	0.99744	1050	0.000465031	0.00705931	0.238006	1062.87	0.997126	18.0484	0.753333	26.0656	-0.661414
0.36288	-8.11475	-0.835488	7550000	0.000468329	0.0088364	0.256503	0.99744	1050	0.000468381	0.00891173	0.25723	1049.56	0.997307	15.6234	0.879941	26.0656	-0.84426
0.3968	-8.77963	-0.928726	7550000	0.000506701	0.0095604	0.263325	0.99744	1050	0.000506822	0.00985911	0.26604	1048.41	0.997179	14.6801	0.941248	26.0656	-0.938761
0.24864	-8.06532	-0.702549	7550000	0.000465476	0.00878257	0.255981	0.99744	1050	0.000465587	0.00754139	0.243305	1058.74	0.99718	17.3233	0.787251	26.0656	-0.70873
0.34016	-8.08983	-0.411092	7550000	0.000466891	0.00880926	0.25624	0.99744	1050	0.000467218	0.00449267	0.204724	1101	0.99672	23.9429	0.557377	26.0656	-0.413157
0.35616	-8.33957	-0.937663	7550000	0.000481304	0.0090812	0.25885	0.99744	1050	0.000481346	0.00995593	0.266908	1045.35	0.99733	14.5924	0.9474	26.0656	-0.948477
0.33984	-8.67114	-0.808772	7550000	0.00050044	0.00944227	0.262236	0.99744	1050	0.000500604	0.00863162	0.254506	1055	0.997091	15.9341	0.861404	26.0656	-0.816419
0.36352	-8.40218	-0.824257	7550000	0.000484917	0.00914939	0.259496	0.99744	1050	0.000485024	0.00879325	0.256085	1052.16	0.997199	15.7529	0.872124	26.0656	-0.832478
0.36224	-7.72878	-0.74129	7550000	0.000446053	0.0084161	0.25237	0.99744	1050	0.000446088	0.00794506	0.247571	1053.15	0.997342	16.7728	0.815099	26.0656	-0.74851
0.35904	-8.52854	-0.890808	7550000	0.00049221	0.00928698	0.260791	0.99744	1050	0.000492306	0.00947437	0.262533	1048.96	0.997224	15.0444	0.916599	26.0656	-0.900305
0.368	-8.08879	-0.797526	7550000	0.000466831	0.00880812	0.256229	0.99744	1050	0.000466897	0.00852154	0.253419	1051.79	0.997277	16.0614	0.854065	26.0656	-0.805524
0.36288	-7.7845	-0.739103	7550000	0.000449269	0.00847677	0.252975	0.99744	1050	0.000449313	0.00792192	0.24733	1053.72	0.99732	16.803	0.813516	26.0656	-0.746225
0.24928	-8.63826	-0.675914	7550000	0.000498542	0.00940646	0.261904	0.99744	1050	0.00049878	0.00726163	0.240258	1065.69	0.996942	17.7339	0.767659	26.0656	-0.681227
0.25152	-8.33912	-0.631394	7550000	0.000481278	0.00908072	0.258845	0.99744	1050	0.000481485	0.00680152	0.235073	1067.79	0.996991	18.4705	0.73488	26.0656	-0.63619
0.25536	-8.79065	-0.980656	7550000	0.000507337	0.0095724	0.263435	0.99744	1050	0.000507436	0.0103886	0.27072	1045.85	0.997225	14.2154	0.974655	26.0656	-0.99187
0.32544	-8.55029	-0.778825	7550000	0.000493465	0.00931067	0.261012	0.99744	1050	0.000493623	0.0083247	0.251453	1056.3	0.997099	16.2948	0.840862	26.0656	-0.786008
0.31936	-8.44409	-0.508488	7550000	0.000487336	0.00919502	0.259927	0.99744	1050	0.000487657	0.00551796	0.219243	1085.38	0.996762	21.0448	0.639241	26.0656	-0.511532
0.32832	-8.75852	-0.927752	7550000	0.000505483	0.00953742	0.263114	0.99744	1050	0.000505601	0.00984942	0.265952	1048.33	0.997185	14.689	0.940631	26.0656	-0.937792
0.32032	-8.85426	-1.13955	7550000	0.000511008	0.00964167	0.264069	0.99744	1050	0.000511049	0.0120014	0.28406	1039.58	0.997339	13.0118	1.07308	26.0656	-1.15474
0.32384	-8.37637	-0.833284	7550000	0.000483428	0.00912128	0.25923	0.99744	1050	0.000483525	0.00888628	0.256985	1051.41	0.997217	15.6508	0.878265	26.0656	-0.84172
0.33408	-8.41834	-0.693491	7550000	0.00048585	0.00916698	0.259662	0.99744	1050	0.000486032	0.00744504	0.242264	1062.28	0.997044	17.4617	0.780531	26.0656	-0.699246
0.33056	-7.86907	-0.218781	7550000	0.00045415	0.00856886	0.253888	0.99744	1050	0.000454662	0.0024333	0.166878	1183.85	0.996295	35.326	0.370348	26.0656	-0.219374
0.32288	-8.5955	-0.901408	7550000	0.000496074	0.00935989	0.261471	0.99744	1050	0.000496176	0.00958206	0.263524	1048.78	0.997213	14.94	0.923531	26.0656	-0.911059
0.3264	-8.4065	-0.731283	7550000	0.000485166	0.00915408	0.259541	0.99744	1050	0.000485324	0.00783581	0.246431	1058.94	0.997094	16.9166	0.80761	26.0656	-0.737708
0.34112	-8.3518	-0.764569	7550000	0.00048201	0.00909452	0.258977	0.99744	1050	0.000482139	0.00817965	0.249984	1055.94	0.997151	16.4729	0.831066	26.0656	-0.771658
0.33824	-7.88055	-0.864854	7550000	0.000454813	0.00858137	0.254011	0.99744	1050	0.000454814	0.00921614	0.260126	1046.35	0.997414	15.3032	0.899867	26.0656	-0.874573
0.33664	-8.62821	-0.752997	7550000	0.000497962	0.00939552	0.261803	0.99744	1050	0.00049815	0.0080581	0.248739	1058.82	0.997042	16.6259	0.822812	26.0656	-0.759635
0.34496	-8.4621	-0.849898	7550000	0.000488376	0.00921463	0.260112	0.99744	1050	0.00048848	0.0090559	0.258609	1050.94	0.997206	15.4692	0.889406	26.0656	-0.858589
0.33408	-8.53237	-0.755904	7550000	0.000492431	0.00929116	0.26083	0.99744	1050	0.000492599	0.00808882	0.249055	1057.9	0.997079	16.5869	0.824902	26.0656	-0.762674
0.33664	-8.61687	-0.682366	7550000	0.000497308	0.00938317	0.261688	0.99744	1050	0.000497537	0.00732857	0.240994	1064.89	0.996958	17.6332	0.772369	26.0656	-0.687798
0.34752	-8.43351	-0.952935	7550000	0.000486726	0.0091835	0.259818	0.99744	1050	0.000486777	0.0101107	0.268283	1045.14	0.997314	14.4546	0.957191	26.0656	-0.963983
0.34368	-8.02846	-0.667816	7550000	0.000463349	0.00874243	0.25559	0.99744	1050	0.000463473	0.00718174	0.239374	1061.53	0.997151	17.8567	0.762019	26.0656	-0.673413
0.33888	-8.70178	-0.879223	7550000	0.000502208	0.00947563	0.262545	0.99744	1050	0.000502341	0.00935386	0.261415	1050.7	0.997156	15.1634	0.90881	26.0656	-0.888272
0.35168	-7.95925	-0.867238	7550000	0.000459355	0.00866707	0.254854	0.99744	1050	0.000459368	0.00923962	0.260347	1046.72	0.99739	15.2792	0.901395	26.0656	-0.87691
0.34016	-8.87684	-1.11212	7550000	0.000512312	0.00966626	0.264294	0.99744	1050	0.000512367	0.0117231	0.281848	1040.71	0.997311	13.1999	1.05643	26.0656	-1.12652
0.33312	-7.48402	-0.521261	7550000	0.000431927	0.00814957	0.249677	0.99744	1050	0.000432042	0.00565602	0.221057	1073.39	0.997154	20.723	0.64986	26.0656	-0.52489
0.3456	-8.10013	-0.592065	7550000	0.000467485	0.00882048	0.256349	0.99744	1050	0.00046767	0.00639346	0.230275	1070.15	0.997024	19.1961	0.705185	26.0656	-0.5964
0.33824	-8.64019	-0.679006	7550000	0.000498654	0.00940856	0.261924	0.99744	1050	0.00049889	0.00729364	0.240611	1065.4	0.996946	17.6856	0.769913	26.0656	-0.684368
0.34016	-8.28877	-0.515854	7550000	0.000478372	0.00902589	0.258323	0.99744	1050	0.000478652	0.00559578	0.220269	1082.54	0.996835	20.8614	0.645237	26.0656	-0.519049
0.33984	-8.51596	-0.965501	7550000	0.000491484	0.00927328	0.260662	0.99744	1050	0.000491543	0.0102378	0.269403	1045.01	0.997299	14.3439	0.965198	26.0656	-0.976735
0.34336	-7.76739	-0.684002	7550000	0.000448281	0.00845814	0.252789	0.99744	1050	0.000448351	0.0073516	0.241247	1057.99	0.997264	17.5997	0.773987	26.0656	-0.69009
0.32064	-8.08383	-0.60499	7550000	0.000466544	0.00880272	0.256177	0.99744	1050	0.000466717	0.00652826	0.231882	1068.49	0.997048	18.9482	0.715062	26.0656	-0.60953
0.32416	-8.07334	-0.731467	7550000	0.000465939	0.00879131	0.256066	0.99744	1050	0.000466036	0.00784043	0.246479	1056.44	0.997211	16.9107	0.807927	26.0656	-0.738175
0.31936	-8.25264	-1.19121	7550000	0.000476287	0.00898655	0.257948	0.99744	1050	0.00047622	0.0125367	0.288223	1034.99	0.997559	12.6695	1.10476	26.0656	-1.20919
0.31872	-8.48442	-0.75127	7550000	0.000489664	0.00923894	0.26034	0.99744	1050	0.000489825	0.00804145	0.248568	1057.91	0.99709	16.6473	0.821678	26.0656	-0.757995
0.31328	-8.34732	-0.970654	7550000	0.000481751	0.00908965	0.25893	0.99744	1050	0.000481781	0.0102927	0.269884	1043.81	0.997357	14.2969	0.968649	26.0656	-0.982259
0.3168	-8.08164	-0.587751	7550000	0.000466418	0.00880034	0.256153	0.99744	1050	0.000466602	0.00634858	0.229734	1070.5	0.997025	19.2806	0.701881	26.0656	-0.592032
0.33024	-7.9292	-0.694509	7550000	0.00045762	0.00863434	0.254533	0.99744	1050	0.000457712	0.00745921	0.242418	1058.36	0.997218	17.4416	0.781521	26.0656	-0.700655
0.30368	-8.36118	-0.978901	7550000	0.000482551	0.00910474	0.259073	0.99744	1050	0.000482579	0.0103767	0.270616	1043.51	0.99736	14.2258	0.973908	26.0656	-0.990689
0.33408	-8.44793	-0.775009	7550000	0.000487558	0.0091992	0.259966	0.99744	1050	0.000487698	0.0082863	0.251066	1055.86	0.99713	16.3415	0.838274	26.0656	-0.78221
0.3024	-7.87159	-0.303094	7550000	0.000454295	0.00857161	0.253915	0.99744	1050	0.000454686	0.00334256	0.185507	1133.03	0.996561	28.8615	0.457648	26.0656	-0.304239
0.3056	-8.37296	-1.06674	7550000	0.000483231	0.00911757	0.259195	0.99744	1050	0.000483226	0.0112712	0.278178	1039.87	0.99743	13.5219	1.0291	26.0656	-1.08081
0.29376	-8.92566	-0.848397	7550000	0.000515129	0.00971942	0.264777	0.99744	1050	0.00051532	0.00903591	0.258419	1054.03	0.997049	15.49	0.888096	26.0656	-0.856581
0.29568	-8.41072	-0.651096	7550000	0.00048541	0.00915868	0.259584	0.99744	1050	0.000485618	0.00700575	0.237403	1066.32	0.996991	18.1337	0.749518	26.0656	-0.656158
0.30208	-8.36232	-0.900702	7550000	0.000482617	0.00910598	0.259085	0.99744	1050	0.00048268	0.00957761	0.263483	1047.4	0.997289	14.9444	0.923245	26.0656	-0.910624
0.30304	-8.18875	-1.03073	7550000	0.0004726	0.00891698	0.25728	0.99744	1050	0.000472581	0.0109079	0.275157	1040.32	0.997458	13.7964	1.00687	26.0656	-1.04415
0.31968	-8.76743	-0.577417	7550000	0.000505997	0.00954712	0.263203	0.99744	1050	0.000506335	0.00623752	0.228387	1078.18	0.996752	19.4931	0.693671	26.0656	-0.58121
0.32576	-7.93122	-0.712358	7550000	0.000457737	0.00863654	0.254554	0.99744	1050	0.000457819	0.00764405	0.244404	1056.89	0.997239	17.1787	0.794379	26.0656	-0.718832
0.3296	-8.09355	-0.559929	7550000	0.000467106	0.00881331	0.256279	0.99744	1050	0.000467311	0.00605803	0.226175	1074.14	0.996979	19.8522	0.680299	26.0656	-0.5638
0.32	-8.44318	-0.484265	7550000	0.000487284	0.00919403	0.259918	0.99744	1050	0.000487625	0.00526361	0.215822	1089.64	0.996719	21.6759	0.619443	26.0656	-0.487022
0.3152	-8.61341	-1.05716	7550000	0.000497108	0.0093794	0.261653	0.99744	1050	0.000497144	0.0111697	0.277341	1041.51	0.997347	13.5969	1.02292	26.0656	-1.07055
0.31872	-7.85033	-1.00868	7550000	0.000453069	0.00854846	0.253686	0.99744	1050	0.00045301	0.0106888	0.273303	1039.38	0.997547	13.9695	0.993344	26.0656	-1.02211
0.31584	-8.43049	-0.8845	7550000	0.000486551	0.00918021	0.259787	0.99744	1050	0.000486633	0.00941091	0.261946	1048.71	0.997251	15.1069	0.912501	26.0656	-0.893975
0.31712	-8.11514	-0.765994	7550000	0.000468352	0.00883682	0.256507	0.99744	1050	0.000468438	0.00819639	0.250154	1054.15	0.997235	16.4524	0.832199	26.0656	-0.773329
0.31936	-8.48615	-0.94484	7550000	0.000489763	0.00924082	0.260358	0.99744	1050	0.000489827	0.0100273	0.267544	1045.85	0.99729	14.5283	0.951923	26.0656	-0.955622
0.32096	-8.43246	-0.79513	7550000	0.000486665	0.00918235	0.259808	0.99744	1050	0.000486792	0.00849355	0.253142	1054.31	0.997158	16.0938	0.852194	26.0656	-0.802735
0.33184	-8.7343	-0.976785	7550000	0.000504085	0.00951104	0.262871	0.99744	1050	0.000504176	0.0103499	0.270383	1045.71	0.997239	14.2481	0.972234	26.0656	-0.987985
0.368	-8.39619	-0.84701	7550000	0.000484572	0.00914287	0.259435	0.99744	1050	0.000484666	0.00902696	0.258334	1050.69	0.997225	15.4998	0.88751	26.0656	-0.855712
0.36672	-8.77534	-1.26571	7550000	0.000506454	0.00955573	0.263282	0.99744	1050	0.000506435	0.0132779	0.293795	1035.14	0.997456	12.2327	1.14789	26.0656	-1.2848
0.36544	-8.30592	-0.695493	7550000	0.000479362	0.00904456	0.258501	0.99744	1050	0.000479522	0.00746655	0.242497	1061.22	0.997086	17.4306	0.782034	26.0656	-0.701363
0.36992	-8.28178	-0.721794	7550000	0.000477969	0.00901828	0.258251	0.99744	1050	0.000478108	0.00773878	0.245409	1058.78	0.997126	17.0478	0.800929	26.0656	-0.728149
0.37056	-8.28442	-0.558489	7550000	0.000478121	0.00902115	0.258278	0.99744	1050	0.000478367	0.00604209	0.225976	1076.17	0.996905	19.8846	0.679106	26.0656	-0.562248
0.40384	-8.26053	-0.974808	7550000	0.000476743	0.00899514	0.25803	0.99744	1050	0.000476757	0.0103364	0.270265	1043.12	0.997389	14.2598	0.971387	26.0656	-0.986648
0.3824	-7.78935	-0.573641	7550000	0.000449549	0.00848206	0.253027	0.99744	1050	0.000449686	0.00620288	0.227963	1069.5	0.997114	19.562	0.6911	26.0656	-0.577874
0.39488	-8.35777	-0.721745	7550000	0.000482354	0.00910102	0.259038	0.99744	1050	0.000482508	0.00773768	0.245398	1059.36	0.9971	17.0492	0.800853	26.0656	-0.728037
0.37824	-8.56603	-1.4677	7550000	0.000494374	0.0093278	0.261172	0.99744	1050	0.000494262	0.0153173	0.308126	1029.27	0.997644	11.2138	1.2626	26.0656	-1.49446
0.36896	-8.29465	-0.753023	7550000	0.000478711	0.00903229	0.258384	0.99744	1050	0.000478836	0.0080611	0.24877	1056.4	0.997158	16.6224	0.823016	26.0656	-0.759944
0.40064	-8.2878	-0.660372	7550000	0.000478316	0.00902483	0.258313	0.99744	1050	0.000478494	0.00710276	0.238493	1064.37	0.997048	17.9795	0.756421	26.0656	-0.665663
0.3936	-8.15717	-0.713779	7550000	0.000470777	0.00888259	0.256949	0.99744	1050	0.000470899	0.0076569	0.244541	1058.5	0.997161	17.1606	0.795269	26.0656	-0.720089
0.39296	-8.54175	-0.897149	7550000	0.000492973	0.00930137	0.260925	0.99744	1050	0.000493067	0.00953911	0.26313	1048.69	0.997226	14.9814	0.920769	26.0656	-0.90677
0.42528	-8.39234	-0.85076	7550000	0.00048435	0.00913867	0.259395	0.99744	1050	0.000484441	0.00906549	0.258701	1050.44	0.99723	15.4592	0.890034	26.0656	-0.859547
0.42816	-7.66289	-0.695872	7550000	0.000442251	0.00834436	0.251651	0.99744	1050	0.000442297	0.00747553	0.242595	1056.17	0.997315	17.4182	0.782661	26.0656	-0.702269
0.4352	-8.19086	-0.861111	7550000	0.000472721	0.00891927	0.257302	0.99744	1050	0.000472774	0.00917394	0.259728	1048.53	0.997307	15.3464	0.897118	26.0656	-0.870355
0.4416	-8.23667	-0.907631	7550000	0.000475365	0.00896916	0.257781	0.99744	1050	0.000475404	0.00965012	0.264146	1046.26	0.997336	14.8753	0.927899	26.0656	-0.917876
0.43744	-8.064	-0.708032	7550000	0.0004654	0.00878113	0.255967	0.99744	1050	0.000465508	0.00759814	0.243914	1058.27	0.997187	17.243	0.791196	26.0656	-0.714314
0.4416	-8.63331	-0.743638	7550000	0.000498257	0.00940107	0.261854	0.99744	1050	0.000498451	0.00796154	0.247742	1059.61	0.997029	16.7505	0.816226	26.0656	-0.750104

## Sheet: HxWxL=0.7x1x32.5 | d=0.39
Transit time of particle Dt (sec)	Signal at antinode Df_anti (Hz)	Signal Df_max near node (Hz)	baseline frequency f (Hz)	nominal buoyant mass m_bnom (pg)	reference volume V_ref (um3)	reference diameter d_ref (um)	nominal alpha_m	nominal density rho_nom (kg/m3)	measured buoyant mass m_b (pg)	measured volume V_meas (um3)	measured diameter d_meas (um)	measured density rho_p (kg/m3)	measured alpha_m	measured alpha_v	measured beta(R/H)^2	measured beta	Signal at node Df_node(Hz)
0.18336	-29.0182	-3.09321	7550000	0.00168032	0.0317042	0.392681	0.994121	1050	0.00168055	0.030669	0.388359	1051.8	0.993964	7.37651	2.00576	26.0656	-3.12691
0.18592	-30.164	-3.52311	7550000	0.00174668	0.0329562	0.397783	0.994121	1050	0.00174673	0.0346754	0.404583	1047.37	0.99407	6.85455	2.17684	26.0656	-3.56543
0.21056	-30.3556	-3.58719	7550000	0.00175777	0.0331654	0.398623	0.994121	1050	0.0017578	0.0352697	0.406881	1046.84	0.994079	6.78532	2.20164	26.0656	-3.63082
0.21152	-28.2854	-3.33239	7550000	0.00163789	0.0309037	0.389347	0.994121	1050	0.00163756	0.0329187	0.397632	1046.75	0.994305	7.07108	2.10269	26.0656	-3.37279
0.21472	-28.5805	-3.5037	7550000	0.00165498	0.031226	0.390696	0.994121	1050	0.00165453	0.0345156	0.403961	1044.94	0.994371	6.87379	2.17015	26.0656	-3.54803
0.2368	-25.4391	-2.96663	7550000	0.00147308	0.0277939	0.375823	0.994121	1050	0.0014723	0.0295202	0.383448	1046.87	0.994622	7.54762	1.95535	26.0656	-3.00221
0.23744	-27.1599	-3.06596	7550000	0.00157272	0.029674	0.384113	0.994121	1050	0.00157235	0.0304342	0.387366	1048.66	0.994334	7.41084	1.99551	26.0656	-3.10147
0.23904	-28.0269	-2.87606	7550000	0.00162292	0.0306212	0.388157	0.994121	1050	0.0016231	0.0286369	0.379585	1053.68	0.993989	7.68557	1.91615	26.0656	-2.90615
0.26656	-23.5784	-2.76027	7550000	0.00136533	0.025761	0.366427	0.994121	1050	0.00136428	0.0275929	0.374915	1046.44	0.994866	7.8594	1.86929	26.0656	-2.79351
0.24224	-26.8948	-3.03029	7550000	0.00155737	0.0293843	0.382859	0.994121	1050	0.00155696	0.0301019	0.385951	1048.72	0.994362	7.4597	1.98096	26.0656	-3.06532
0.24	-28.1349	-3.15204	7550000	0.00162918	0.0307392	0.388655	0.994121	1050	0.00162902	0.0312307	0.390716	1049.16	0.994197	7.29712	2.03017	26.0656	-3.18825
0.23872	-28.371	-3.25257	7550000	0.00164285	0.0309971	0.389739	0.994121	1050	0.00164264	0.0321702	0.394595	1048.06	0.994227	7.16897	2.07069	26.0656	-3.29087
0.27872	-29.5042	-3.29966	7550000	0.00170847	0.0322353	0.394861	0.994121	1050	0.00170859	0.0325974	0.396334	1049.41	0.994031	7.11244	2.08898	26.0656	-3.33749
0.27072	-27.5472	-2.99434	7550000	0.00159515	0.0300972	0.38593	0.994121	1050	0.001595	0.0297558	0.384466	1050.6	0.994193	7.51139	1.96574	26.0656	-3.02765
0.2576	-28.8174	-3.40183	7550000	0.0016687	0.0314848	0.391773	0.994121	1050	0.00166844	0.033561	0.400202	1046.71	0.994249	6.98984	2.12995	26.0656	-3.44316
0.28704	-29.1686	-3.34539	7550000	0.00168904	0.0318686	0.393358	0.994121	1050	0.00168898	0.0330291	0.398076	1048.14	0.994135	7.05681	2.10738	26.0656	-3.3848
0.28736	-29.4965	-3.32509	7550000	0.00170802	0.0322268	0.394826	0.994121	1050	0.0017081	0.0328353	0.397296	1049.02	0.994053	7.08161	2.09913	26.0656	-3.36355
0.2864	-28.7929	-3.33247	7550000	0.00166728	0.0314581	0.391662	0.994121	1050	0.00166711	0.0329129	0.397609	1047.65	0.994202	7.07174	2.10244	26.0656	-3.37211
0.29696	-30.1205	-3.45732	7550000	0.00174415	0.0329086	0.397591	0.994121	1050	0.00174428	0.0340623	0.402184	1048.21	0.994029	6.92801	2.15111	26.0656	-3.49808
0.30048	-29.3309	-3.45799	7550000	0.00169843	0.0320459	0.394086	0.994121	1050	0.00169828	0.0340787	0.402249	1046.83	0.994188	6.92615	2.15179	26.0656	-3.49995
0.3088	-28.4191	-3.03192	7550000	0.00164564	0.0310497	0.38996	0.994121	1050	0.00164574	0.0300999	0.385942	1051.68	0.994039	7.4597	1.98087	26.0656	-3.06498
0.32832	-23.6303	-2.70585	7550000	0.00136833	0.0258176	0.366696	0.994121	1050	0.00136735	0.027076	0.372559	1047.5	0.994811	7.94897	1.84587	26.0656	-2.73767
0.3056	-29.2339	-3.5846	7550000	0.00169282	0.03194	0.393652	0.994121	1050	0.00169248	0.0352611	0.406848	1045	0.994299	6.78649	2.20128	26.0656	-3.62997
0.32064	-29.1006	-3.39903	7550000	0.0016851	0.0317943	0.393052	0.994121	1050	0.00168495	0.0335312	0.400083	1047.25	0.99419	6.99351	2.12869	26.0656	-3.43986
0.31328	-28.4015	-3.29757	7550000	0.00164461	0.0310304	0.389879	0.994121	1050	0.00164435	0.0325914	0.39631	1047.45	0.994255	7.11341	2.08872	26.0656	-3.33693
0.30848	-28.6511	-3.24846	7550000	0.00165907	0.0313032	0.391018	0.994121	1050	0.00165896	0.0321283	0.394424	1048.64	0.994166	7.1745	2.06889	26.0656	-3.28626
0.30144	-29.0528	-3.33048	7550000	0.00168233	0.031742	0.392837	0.994121	1050	0.00168225	0.0328911	0.397521	1048.15	0.994148	7.0745	2.10151	26.0656	-3.36969
0.30976	-29.5239	-3.41057	7550000	0.00170961	0.0322568	0.394949	0.994121	1050	0.00170959	0.0336336	0.40049	1047.83	0.994113	6.98072	2.13302	26.0656	-3.45106
0.2992	-27.7164	-3.23311	7550000	0.00160494	0.0302819	0.386719	0.994121	1050	0.00160454	0.0319962	0.393882	1047.15	0.994347	7.19236	2.06321	26.0656	-3.27189
0.32608	-29.1658	-3.36944	7550000	0.00168887	0.0318656	0.393346	0.994121	1050	0.00168878	0.0332539	0.398977	1047.78	0.994154	7.02828	2.11693	26.0656	-3.40944
0.3664	-24.5121	-2.65503	7550000	0.0014194	0.0267811	0.371202	0.994121	1050	0.00141872	0.0265831	0.370285	1050.37	0.994572	8.03678	1.8234	26.0656	-2.68445
0.31904	-28.4831	-3.56409	7550000	0.00164934	0.0311196	0.390252	0.994121	1050	0.00164879	0.0350809	0.406154	1044	0.994433	6.8074	2.19378	26.0656	-3.61019
0.34816	-28.1885	-2.96509	7550000	0.00163228	0.0307978	0.388902	0.994121	1050	0.00163239	0.0294738	0.383247	1052.38	0.994031	7.55419	1.9533	26.0656	-2.99694
0.36384	-29.8167	-3.47378	7550000	0.00172656	0.0325767	0.39625	0.994121	1050	0.00172656	0.0342197	0.402803	1047.46	0.994102	6.90902	2.15773	26.0656	-3.5154
0.33376	-28.5606	-3.15045	7550000	0.00165383	0.0312043	0.390606	0.994121	1050	0.00165382	0.0312106	0.390632	1049.99	0.994107	7.2999	2.0293	26.0656	-3.18605
0.32032	-28.6227	-3.31864	7550000	0.00165743	0.0312722	0.390889	0.994121	1050	0.00165721	0.0327857	0.397096	1047.55	0.994226	7.08815	2.09702	26.0656	-3.35819
0.32064	-28.0272	-3.33056	7550000	0.00162294	0.0306215	0.388159	0.994121	1050	0.00162252	0.0329051	0.397577	1046.31	0.994357	7.07288	2.10211	26.0656	-3.37132
0.31296	-27.5567	-3.23181	7550000	0.0015957	0.0301075	0.385974	0.994121	1050	0.00159525	0.0319861	0.393841	1046.87	0.994379	7.19374	2.06278	26.0656	-3.2708
0.37312	-28.5156	-3.4459	7550000	0.00165122	0.0311552	0.390401	0.994121	1050	0.00165082	0.0339769	0.401848	1045.59	0.994343	6.93867	2.14751	26.0656	-3.48884
0.3312	-29.5578	-3.5847	7550000	0.00171157	0.0322938	0.3951	0.994121	1050	0.00171134	0.0352574	0.406834	1045.54	0.994235	6.78686	2.20113	26.0656	-3.62954
0.37152	-29.4889	-3.10655	7550000	0.00170758	0.0322185	0.394792	0.994121	1050	0.00170796	0.0307893	0.388867	1052.47	0.993876	7.35914	2.011	26.0656	-3.13997
0.3952	-28.0033	-2.88647	7550000	0.00162156	0.0305954	0.388048	0.994121	1050	0.00162171	0.0287353	0.380019	1053.44	0.994003	7.66982	1.92054	26.0656	-2.91681
0.37504	-29.4023	-3.78175	7550000	0.00170257	0.0321239	0.394406	0.994121	1050	0.00170205	0.0370937	0.413778	1042.89	0.994402	6.5843	2.27691	26.0656	-3.83214
0.35264	-28.6375	-3.26465	7550000	0.00165828	0.0312884	0.390956	0.994121	1050	0.00165815	0.0322802	0.395045	1048.37	0.994182	7.15426	2.07541	26.0656	-3.30286
0.35968	-20.7252	-2.10689	7550000	0.00120011	0.0226436	0.351007	0.994121	1050	0.00119906	0.0213817	0.344362	1053.08	0.994972	9.16112	1.57703	26.0656	-2.12872
0.3312	-26.435	-2.94322	7550000	0.00153074	0.028882	0.380665	0.994121	1050	0.0015303	0.0292871	0.382436	1049.25	0.99439	7.58331	1.94505	26.0656	-2.97681
0.38688	-29.4513	-3.37639	7550000	0.00170541	0.0321775	0.394625	0.994121	1050	0.0017054	0.0333152	0.399222	1048.19	0.994102	7.0205	2.11953	26.0656	-3.41614
0.33664	-29.2045	-3.56485	7550000	0.00169111	0.0319078	0.393519	0.994121	1050	0.00169079	0.0350774	0.40614	1045.2	0.994291	6.80769	2.19363	26.0656	-3.60974
0.33344	-29.1996	-3.41081	7550000	0.00169083	0.0319024	0.393497	0.994121	1050	0.00169069	0.0336399	0.400515	1047.26	0.994179	6.97999	2.13328	26.0656	-3.45178
0.26368	-27.6511	-3.66114	7550000	0.00160116	0.0302106	0.386415	0.994121	1050	0.00160026	0.0359995	0.409669	1041.45	0.994662	6.70329	2.23191	26.0656	-3.71148
0.27104	-28.0019	-3.07981	7550000	0.00162147	0.0305938	0.388042	0.994121	1050	0.00162136	0.0305543	0.387875	1050.06	0.994167	7.39324	2.00076	26.0656	-3.1145
0.26944	-28.9129	-3.95986	7550000	0.00167423	0.0315892	0.392205	0.994121	1050	0.00167337	0.038757	0.419872	1040.18	0.99461	6.41429	2.34448	26.0656	-4.01634
0.16224	-29.2903	-3.73647	7550000	0.00169608	0.0320015	0.393904	0.994121	1050	0.00169558	0.0366744	0.412213	1043.23	0.994393	6.62914	2.25972	26.0656	-3.78582
0.16544	-29.4081	-3.45048	7550000	0.0017029	0.0321303	0.394432	0.994121	1050	0.00170279	0.0340076	0.401969	1047.07	0.994167	6.93479	2.1488	26.0656	-3.49213
0.16192	-29.4579	-3.38347	7550000	0.00170579	0.0321847	0.394654	0.994121	1050	0.00170578	0.0333813	0.399486	1048.1	0.994106	7.01219	2.12234	26.0656	-3.42339
0.16224	-30.2056	-3.39892	7550000	0.00174908	0.0330015	0.397965	0.994121	1050	0.00174932	0.0335164	0.400024	1049.19	0.993966	6.99516	2.12806	26.0656	-3.43815
0.16256	-30.1888	-3.56832	7550000	0.00174811	0.0329832	0.397892	0.994121	1050	0.00174811	0.0350962	0.406213	1046.81	0.994098	6.80535	2.19442	26.0656	-3.61174
0.16256	-29.7813	-3.34432	7550000	0.00172451	0.032538	0.396093	0.994121	1050	0.00172467	0.0330116	0.398006	1049.24	0.99401	7.05894	2.10664	26.0656	-3.38284
0.16096	-29.7132	-3.95486	7550000	0.00172057	0.0324636	0.395791	0.994121	1050	0.00171996	0.0386964	0.419653	1041.45	0.994455	6.42016	2.34203	26.0656	-4.00955
0.17504	-28.7408	-3.44045	7550000	0.00166426	0.0314011	0.391425	0.994121	1050	0.00166394	0.0339229	0.401635	1046.05	0.994293	6.94523	2.14523	26.0656	-3.48289
0.18144	-30.7146	-4.30673	7550000	0.00177856	0.0335577	0.400189	0.994121	1050	0.00177787	0.0419361	0.431052	1039.39	0.994487	6.11944	2.47099	26.0656	-4.36974
0.19456	-30.4516	-3.58856	7550000	0.00176333	0.0332704	0.399043	0.994121	1050	0.0017634	0.0352813	0.406926	1046.98	0.994061	6.78398	2.20212	26.0656	-3.63209
0.18944	-24.5817	-2.48431	7550000	0.00142343	0.0268571	0.371553	0.994121	1050	0.00142299	0.0249594	0.362587	1054.01	0.994405	8.34641	1.74838	26.0656	-2.50989
0.19392	-26.6121	-3.04323	7550000	0.001541	0.0290755	0.381513	0.994121	1050	0.00154049	0.0302271	0.386485	1047.96	0.994432	7.44126	1.98644	26.0656	-3.07897
0.19232	-29.0553	-3.1677	7550000	0.00168247	0.0317448	0.392848	0.994121	1050	0.00168261	0.0313669	0.391283	1050.64	0.994018	7.27801	2.03607	26.0656	-3.20305
0.19456	-29.7051	-3.59815	7550000	0.0017201	0.0324547	0.395755	0.994121	1050	0.0017199	0.0353806	0.407307	1045.61	0.994216	6.77271	2.20626	26.0656	-3.64309
0.21568	-29.2586	-2.94127	7550000	0.00169425	0.0319669	0.393762	0.994121	1050	0.00169479	0.0292391	0.382227	1054.96	0.99378	7.59019	1.94292	26.0656	-2.97138
0.21696	-28.759	-3.24319	7550000	0.00166532	0.0314211	0.391508	0.994121	1050	0.00166525	0.0320776	0.394216	1048.91	0.99414	7.18126	2.06671	26.0656	-3.28071
0.21856	-30.3766	-3.49759	7550000	0.00175899	0.0331885	0.398715	0.994121	1050	0.00175915	0.0344345	0.403644	1048.09	0.994008	6.88315	2.16675	26.0656	-3.53896
0.21376	-29.8053	-3.31379	7550000	0.00172591	0.0325643	0.3962	0.994121	1050	0.00172611	0.032726	0.396854	1049.74	0.993981	7.09567	2.09447	26.0656	-3.35155
0.21504	-26.7393	-3.2147	7550000	0.00154836	0.0292144	0.38212	0.994121	1050	0.00154769	0.0318367	0.393227	1045.61	0.994536	7.21404	2.05635	26.0656	-3.25453
0.23616	-28.6046	-3.24673	7550000	0.00165638	0.0312524	0.390806	0.994121	1050	0.00165625	0.0321126	0.39436	1048.58	0.994174	7.1766	2.06822	26.0656	-3.28456
0.25888	-29.3307	-2.76355	7550000	0.00169842	0.0320457	0.394085	0.994121	1050	0.00169928	0.0275641	0.374785	1058.65	0.993598	7.86309	1.86799	26.0656	-2.78997
0.26112	-29.5774	-3.48327	7550000	0.00171271	0.0323152	0.395187	0.994121	1050	0.00171261	0.0343113	0.403162	1046.91	0.994157	6.89803	2.16158	26.0656	-3.52549
0.26496	-29.7744	-3.33144	7550000	0.00172412	0.0325305	0.396063	0.994121	1050	0.00172429	0.0328913	0.397522	1049.42	0.994001	7.07435	2.10152	26.0656	-3.36966
0.26912	-28.2679	-3.61676	7550000	0.00163688	0.0308845	0.389267	0.994121	1050	0.0016362	0.0355755	0.408054	1042.99	0.994512	6.75077	2.21435	26.0656	-3.66468
0.26336	-28.1469	-2.92459	7550000	0.00162987	0.0307523	0.38871	0.994121	1050	0.00163003	0.0290929	0.381589	1053.03	0.994005	7.61322	1.93644	26.0656	-2.9556
0.26176	-29.6468	-3.25287	7550000	0.00171673	0.032391	0.395496	0.994121	1050	0.00171696	0.0321578	0.394545	1050.39	0.993964	7.17038	2.07016	26.0656	-3.28941
0.26016	-29.6558	-3.38565	7550000	0.00171725	0.0324009	0.395536	0.994121	1050	0.0017173	0.0333991	0.399557	1048.42	0.994067	7.00992	2.12309	26.0656	-3.42533
0.2656	-28.5389	-3.55892	7550000	0.00165257	0.0311806	0.390507	0.994121	1050	0.00165204	0.0350318	0.405965	1044.16	0.994418	6.81308	2.19173	26.0656	-3.60479
0.25152	-28.5474	-3.32679	7550000	0.00165306	0.0311899	0.390546	0.994121	1050	0.00165282	0.0328629	0.397407	1047.29	0.994248	7.07821	2.10031	26.0656	-3.36665
0.24928	-29.8599	-2.27815	7550000	0.00172907	0.0326239	0.396441	0.994121	1050	0.00173108	0.022958	0.352624	1072.4	0.992942	8.77486	1.65362	26.0656	-2.29559
0.26112	-29.2455	-3.53791	7550000	0.00169349	0.0319526	0.393703	0.994121	1050	0.00169321	0.0348257	0.405167	1045.62	0.994263	6.83702	2.18313	26.0656	-3.58204
0.26176	-28.7019	-2.72921	7550000	0.00166201	0.0313587	0.391249	0.994121	1050	0.00166267	0.0272451	0.373333	1058.03	0.993704	7.91827	1.85355	26.0656	-2.75555
0.25696	-30.3191	-3.4944	7550000	0.00175566	0.0331256	0.398463	0.994121	1050	0.0017558	0.0344055	0.403531	1048.03	0.994017	6.88663	2.16553	26.0656	-3.53578
0.26368	-29.8614	-3.12849	7550000	0.00172915	0.0326255	0.396448	0.994121	1050	0.00172964	0.0309912	0.389714	1052.81	0.993816	7.33038	2.01978	26.0656	-3.16195
0.26176	-27.8435	-2.86397	7550000	0.0016123	0.0304208	0.387309	0.994121	1050	0.00161244	0.0285248	0.379089	1053.53	0.994018	7.70368	1.91115	26.0656	-2.89401
0.26304	-29.5363	-3.56013	7550000	0.00171033	0.0322703	0.395004	0.994121	1050	0.00171012	0.0350287	0.405953	1045.82	0.994222	6.81328	2.1916	26.0656	-3.60436
0.27008	-28.6252	-3.3689	7550000	0.00165757	0.0312749	0.3909	0.994121	1050	0.0016573	0.0332557	0.398984	1046.83	0.994264	7.02813	2.11701	26.0656	-3.40969
0.25984	-29.9417	-3.41999	7550000	0.0017338	0.0327132	0.396803	0.994121	1050	0.00173391	0.0337162	0.400818	1048.43	0.994036	6.97042	2.13651	26.0656	-3.4601
0.27168	-29.3955	-2.99193	7550000	0.00170217	0.0321164	0.394375	0.994121	1050	0.00170269	0.0297141	0.384286	1054.3	0.993796	7.51734	1.96391	26.0656	-3.02296
0.26304	-25.3861	-2.85254	7550000	0.00147001	0.027736	0.375562	0.994121	1050	0.00146935	0.0284437	0.37873	1048.66	0.994543	7.71732	1.90752	26.0656	-2.88542
0.27456	-29.1258	-3.52949	7550000	0.00168655	0.0318218	0.393165	0.994121	1050	0.00168625	0.0347488	0.404868	1045.53	0.994281	6.84606	2.17991	26.0656	-3.5736
0.26752	-28.7089	-3.48588	7550000	0.00166241	0.0313663	0.391281	0.994121	1050	0.00166202	0.0343475	0.403304	1045.39	0.994333	6.89384	2.16309	26.0656	-3.52953
0.26528	-29.178	-3.46322	7550000	0.00168958	0.0318788	0.3934	0.994121	1050	0.00168937	0.0341295	0.402449	1046.5	0.994222	6.92002	2.15393	26.0656	-3.50554
0.26816	-30.5254	-4.1248	7550000	0.0017676	0.033351	0.399365	0.994121	1050	0.00176705	0.0402571	0.425221	1040.89	0.99441	6.27041	2.40459	26.0656	-4.18277
0.27296	-29.4092	-3.6426	7550000	0.00170297	0.0321314	0.394437	0.994121	1050	0.00170261	0.0357989	0.408906	1044.56	0.994305	6.72541	2.22361	26.0656	-3.68921
0.2752	-30.635	-3.27915	7550000	0.00177395	0.0334707	0.399842	0.994121	1050	0.00177451	0.032393	0.395504	1051.78	0.993782	7.13902	2.08024	26.0656	-3.31503
0.27008	-28.3347	-3.9283	7550000	0.00164075	0.0309575	0.389573	0.994121	1050	0.00163976	0.0384746	0.41885	1039.62	0.9947	6.44242	2.33307	26.0656	-3.98507
0.26784	-27.2779	-3.23724	7550000	0.00157955	0.0298028	0.384668	0.994121	1050	0.00157901	0.0320407	0.394065	1046.28	0.994441	7.18646	2.06513	26.0656	-3.2768
0.26944	-29.783	-3.26905	7550000	0.00172461	0.0325398	0.396101	0.994121	1050	0.00172487	0.0323079	0.395157	1050.39	0.993949	7.1504	2.07659	26.0656	-3.30579
0.26496	-29.0602	-3.14929	7550000	0.00168276	0.0317501	0.39287	0.994121	1050	0.00168292	0.0311942	0.390564	1050.95	0.994002	7.30208	2.02859	26.0656	-3.18421
0.26176	-29.8125	-3.55773	7550000	0.00172632	0.032572	0.396231	0.994121	1050	0.00172621	0.0350027	0.405852	1046.32	0.994165	6.81627	2.19052	26.0656	-3.60147
0.2704	-27.6307	-3.06815	7550000	0.00159998	0.0301884	0.38632	0.994121	1050	0.00159976	0.0304491	0.387429	1049.54	0.994236	7.40857	1.99616	26.0656	-3.10307
0.26976	-29.6771	-3.36611	7550000	0.00171848	0.0324241	0.395631	0.994121	1050	0.00171857	0.0332164	0.398827	1048.74	0.994048	7.03293	2.11534	26.0656	-3.40529
0.27456	-29.1282	-3.1525	7550000	0.0016867	0.0318245	0.393176	0.994121	1050	0.00168688	0.0312237	0.390687	1051.03	0.99399	7.29791	2.02987	26.0656	-3.1874
0.2672	-28.267	-3.36659	7550000	0.00163683	0.0308836	0.389263	0.994121	1050	0.00163644	0.033239	0.398917	1046.23	0.994335	7.03031	2.1163	26.0656	-3.40789
0.27904	-30.41	-3.35028	7550000	0.00176092	0.0332249	0.398861	0.994121	1050	0.0017613	0.0330599	0.3982	1050.28	0.993886	7.05266	2.10869	26.0656	-3.38808
0.2736	-27.8417	-3.65571	7550000	0.0016122	0.0304188	0.3873	0.994121	1050	0.00161135	0.0359457	0.409464	1041.83	0.994621	6.70925	2.22968	26.0656	-3.70553
0.28128	-29.0488	-3.4358	7550000	0.0016821	0.0317377	0.392819	0.994121	1050	0.00168188	0.0338753	0.401447	1046.65	0.994228	6.95101	2.14322	26.0656	-3.47763
0.27776	-28.9318	-3.20578	7550000	0.00167532	0.0316099	0.392291	0.994121	1050	0.00167537	0.0317252	0.392767	1049.81	0.994074	7.22877	2.05155	26.0656	-3.24218
0.27168	-27.7838	-3.29786	7550000	0.00160885	0.0303556	0.387032	0.994121	1050	0.00160839	0.0326022	0.396354	1046.33	0.994382	7.11211	2.08919	26.0656	-3.33817
0.2736	-28.9634	-3.38851	7550000	0.00167715	0.0316443	0.392433	0.994121	1050	0.00167696	0.0334347	0.399699	1047.16	0.99421	7.00559	2.1246	26.0656	-3.42929
0.27264	-28.7595	-3.31967	7550000	0.00166535	0.0314216	0.39151	0.994121	1050	0.00166518	0.0327937	0.397128	1047.78	0.994199	7.0871	2.09736	26.0656	-3.35905
0.2752	-29.3587	-3.27875	7550000	0.00170004	0.0320763	0.394211	0.994121	1050	0.00170014	0.0324035	0.395547	1049.47	0.994044	7.13785	2.08069	26.0656	-3.31629
0.27968	-30.7015	-3.46329	7550000	0.0017778	0.0335434	0.400131	0.994121	1050	0.00177813	0.0341109	0.402375	1049.13	0.993917	6.92202	2.15315	26.0656	-3.50337

## Sheet: HxWxL=0.7x1x32.5 | d=0.51
Transit time of particle Dt (sec)	Signal at antinode Df_anti (Hz)	Signal Df_max near node (Hz)	baseline frequency f (Hz)	nominal buoyant mass m_bnom (pg)	reference volume V_ref (um3)	reference diameter d_ref (um)	nominal alpha_m	nominal density rho_nom (kg/m3)	measured buoyant mass m_b (pg)	measured volume V_meas (um3)	measured diameter d_meas (um)	measured density rho_p (kg/m3)	measured alpha_m	measured alpha_v	measured beta(R/H)^2	measured beta	Signal at node Df_node(Hz)
0.176	-56.8941	-7.04078	7550000	0.00330421	0.0623435	0.491961	0.991203	1050	0.00330179	0.0663059	0.502171	1046.8	0.991908	4.65356	3.35362	26.0656	-7.13078
0.17632	-56.6777	-6.39088	7550000	0.00329164	0.0621064	0.491337	0.991203	1050	0.00329048	0.0604956	0.487052	1051.39	0.99153	4.91569	3.15473	26.0656	-6.46481
0.17696	-57.0604	-6.82046	7550000	0.00331386	0.0625257	0.49244	0.991203	1050	0.00331197	0.0643352	0.497145	1048.48	0.99175	4.73823	3.28684	26.0656	-6.90445
0.1904	-57.535	-6.73153	7550000	0.00334143	0.0630458	0.493802	0.991203	1050	0.00333994	0.0635344	0.495074	1049.57	0.991624	4.77379	3.2595	26.0656	-6.81254
0.19392	-57.4885	-6.70248	7550000	0.00333873	0.0629949	0.493669	0.991203	1050	0.00333728	0.0632752	0.4944	1049.74	0.991612	4.78546	3.25063	26.0656	-6.78283
0.1968	-58.0599	-6.83888	7550000	0.00337191	0.063621	0.495299	0.991203	1050	0.00337044	0.0644872	0.497537	1049.27	0.991615	4.73148	3.29201	26.0656	-6.92178
0.2048	-58.3344	-7.21282	7550000	0.00338785	0.0639217	0.496078	0.991203	1050	0.00338573	0.0678217	0.505968	1046.92	0.991803	4.59096	3.40454	26.0656	-7.30493
0.19744	-58.2253	-7.15384	7550000	0.00338151	0.0638021	0.495768	0.991203	1050	0.00337946	0.0672972	0.504661	1047.22	0.991784	4.61233	3.38696	26.0656	-7.24458
0.208	-58.5408	-7.55123	7550000	0.00339984	0.0641479	0.496662	0.991203	1050	0.00339715	0.0708346	0.513352	1044.96	0.991968	4.47312	3.50463	26.0656	-7.65216
0.20832	-56.9901	-6.87465	7550000	0.00330978	0.0624486	0.492238	0.991203	1050	0.00330774	0.0648205	0.498392	1048.03	0.991793	4.71701	3.30334	26.0656	-6.96014
0.20544	-58.2353	-7.01893	7550000	0.0033821	0.0638131	0.495797	0.991203	1050	0.00338033	0.0660928	0.501632	1048.15	0.991701	4.66243	3.34643	26.0656	-7.10614
0.2064	-57.9309	-6.59516	7550000	0.00336442	0.0634796	0.494932	0.991203	1050	0.00336342	0.0623099	0.491873	1050.98	0.991477	4.82961	3.21749	26.0656	-6.67224
0.22048	-58.4951	-7.13414	7550000	0.00339719	0.0640978	0.496533	0.991203	1050	0.0033953	0.0671178	0.504212	1047.59	0.991733	4.61968	3.38094	26.0656	-7.22391
0.21952	-58.049	-6.96922	7550000	0.00337128	0.063609	0.495268	0.991203	1050	0.00336953	0.0656515	0.500513	1048.32	0.991697	4.68115	3.33152	26.0656	-7.05545
0.22176	-58.8193	-7.11809	7550000	0.00341602	0.0644531	0.497449	0.991203	1050	0.00341431	0.0669704	0.503842	1047.98	0.991677	4.62573	3.37599	26.0656	-7.20691
0.22528	-56.5901	-5.02777	7550000	0.00328655	0.0620103	0.491083	0.991203	1050	0.00328888	0.0482326	0.451628	1065.19	0.99048	5.62678	2.71252	26.0656	-5.07293
0.22528	-57.8114	-7.49603	7550000	0.00335748	0.0633486	0.494591	0.991203	1050	0.00335458	0.0703539	0.512189	1044.68	0.992039	4.49143	3.48876	26.0656	-7.59679
0.22112	-57.6868	-6.4404	7550000	0.00335024	0.0632121	0.494235	0.991203	1050	0.00334947	0.0609279	0.488209	1051.97	0.99141	4.89476	3.16973	26.0656	-6.51411
0.22112	-58.6101	-7.0172	7550000	0.00340386	0.0642238	0.496858	0.991203	1050	0.00340227	0.0660725	0.501581	1048.49	0.991646	4.66326	3.34574	26.0656	-7.10376
0.2176	-57.7588	-7.20191	7550000	0.00335442	0.063291	0.494441	0.991203	1050	0.00335206	0.0677324	0.505746	1046.49	0.991879	4.59462	3.40155	26.0656	-7.29472
0.22336	-57.5979	-6.22572	7550000	0.00334508	0.0631147	0.493981	0.991203	1050	0.00334476	0.059006	0.483021	1053.69	0.991276	4.98932	3.10272	26.0656	-6.29456
0.22432	-58.2075	-6.90332	7550000	0.00338048	0.0637827	0.495718	0.991203	1050	0.00337894	0.065061	0.499008	1048.94	0.991634	4.70649	3.31151	26.0656	-6.98762
0.22528	-58.4687	-6.48209	7550000	0.00339565	0.0640689	0.496458	0.991203	1050	0.00339518	0.0612924	0.489181	1052.39	0.991321	4.87729	3.18237	26.0656	-6.55573
0.2256	-57.235	-7.06315	7550000	0.003324	0.062717	0.492942	0.991203	1050	0.00332169	0.0665009	0.502662	1046.95	0.991872	4.64537	3.36019	26.0656	-7.15316
0.2288	-58.0072	-7.06533	7550000	0.00336885	0.0635632	0.495149	0.991203	1050	0.00336688	0.0665099	0.502685	1047.62	0.991762	4.64494	3.3605	26.0656	-7.15411
0.22848	-57.2603	-6.59592	7550000	0.00332547	0.0627448	0.493015	0.991203	1050	0.00332415	0.0623245	0.491911	1050.34	0.991578	4.82898	3.21799	26.0656	-6.67399
0.22624	-58.1134	-6.8734	7550000	0.00337502	0.0636796	0.495451	0.991203	1050	0.0033735	0.0647949	0.498327	1049.06	0.991629	4.71803	3.30248	26.0656	-6.95709
0.23424	-57.3825	-6.55325	7550000	0.00333257	0.0628787	0.493365	0.991203	1050	0.00333139	0.0619413	0.490901	1050.78	0.991531	4.8468	3.20479	26.0656	-6.6301
0.23008	-57.2471	-6.61726	7550000	0.0033247	0.0627303	0.492976	0.991203	1050	0.00332332	0.0625156	0.492413	1050.16	0.991593	4.82017	3.22456	26.0656	-6.69587
0.23168	-57.75	-6.68642	7550000	0.00335391	0.0632814	0.494416	0.991203	1050	0.00335262	0.0631285	0.494017	1050.11	0.991563	4.79208	3.24561	26.0656	-6.76599
0.23008	-57.2558	-6.37126	7550000	0.00332521	0.0627399	0.493002	0.991203	1050	0.00332438	0.0603135	0.486563	1052.12	0.991429	4.9245	3.14839	26.0656	-6.44393
0.23616	-58.4594	-7.09396	7550000	0.00339511	0.0640587	0.496432	0.991203	1050	0.00339329	0.0667594	0.503313	1047.83	0.991714	4.63452	3.36889	26.0656	-7.18275
0.23264	-58.7194	-7.0546	7550000	0.00341021	0.0643437	0.497167	0.991203	1050	0.00340859	0.0664048	0.50242	1048.33	0.991653	4.64928	3.35695	26.0656	-7.14195
0.23232	-57.0005	-6.79239	7550000	0.00331038	0.06246	0.492268	0.991203	1050	0.00330852	0.0640851	0.4965	1048.63	0.991741	4.74928	3.27831	26.0656	-6.87576
0.2368	-57.6929	-6.80356	7550000	0.00335059	0.0632188	0.494253	0.991203	1050	0.00334902	0.0641762	0.496736	1049.18	0.991646	4.74519	3.28142	26.0656	-6.88614
0.23552	-58.1196	-6.63052	7550000	0.00337538	0.0636864	0.495468	0.991203	1050	0.00337439	0.0626239	0.492698	1050.88	0.991472	4.81511	3.22829	26.0656	-6.70819
0.23968	-57.6138	-6.84204	7550000	0.003346	0.0631321	0.494027	0.991203	1050	0.00334431	0.0645211	0.497624	1048.83	0.991682	4.73003	3.29316	26.0656	-6.92571
0.24384	-58.754	-7.38676	7550000	0.00341222	0.0643816	0.497265	0.991203	1050	0.00340994	0.069366	0.50978	1046.16	0.991845	4.52956	3.45602	26.0656	-7.4828
0.23904	-57.697	-6.86673	7550000	0.00335083	0.0632233	0.494265	0.991203	1050	0.00334913	0.0647406	0.498187	1048.73	0.991685	4.72043	3.30063	26.0656	-6.9509
0.24064	-58.9141	-6.94278	7550000	0.00342152	0.064557	0.497716	0.991203	1050	0.00342023	0.0654044	0.499884	1049.29	0.991556	4.69165	3.32315	26.0656	-7.02698
0.24064	-57.733	-6.82883	7550000	0.00335292	0.0632627	0.494367	0.991203	1050	0.00335132	0.0644015	0.497316	1049.04	0.991656	4.73526	3.2891	26.0656	-6.91198
0.23968	-57.3835	-7.08332	7550000	0.00333262	0.0628797	0.493368	0.991203	1050	0.00333034	0.066679	0.503111	1046.95	0.991862	4.63794	3.36619	26.0656	-7.17362
0.24512	-58.3979	-7.01933	7550000	0.00339154	0.0639913	0.496258	0.991203	1050	0.00338984	0.0660942	0.501635	1048.29	0.991678	4.66236	3.34648	26.0656	-7.10628
0.24544	-58.3138	-7.04913	7550000	0.00338665	0.0638991	0.49602	0.991203	1050	0.00338486	0.0663613	0.50231	1048.01	0.991708	4.65114	3.35549	26.0656	-7.13699
0.24288	-57.5533	-6.90462	7550000	0.00334249	0.0630659	0.493854	0.991203	1050	0.00334064	0.0650809	0.499059	1048.33	0.99173	4.70567	3.31219	26.0656	-6.98998
0.24512	-58.5111	-7.05989	7550000	0.00339812	0.0641154	0.496578	0.991203	1050	0.00339639	0.0664547	0.502546	1048.11	0.991686	4.64721	3.35863	26.0656	-7.14771
0.24544	-57.734	-6.40411	7550000	0.00335299	0.0632639	0.49437	0.991203	1050	0.00335232	0.0606025	0.487338	1052.32	0.991379	4.91042	3.15844	26.0656	-6.47691
0.24544	-58.6388	-7.33743	7550000	0.00340553	0.0642553	0.496939	0.991203	1050	0.00340329	0.0689285	0.508706	1046.37	0.991833	4.5467	3.44148	26.0656	-7.43234
0.24736	-58.0903	-6.71535	7550000	0.00337367	0.0636542	0.495385	0.991203	1050	0.00337248	0.0633831	0.494681	1050.21	0.991532	4.78055	3.25433	26.0656	-6.79513
0.24672	-57.0482	-6.73721	7550000	0.00331316	0.0625124	0.492405	0.991203	1050	0.00331143	0.0635912	0.495221	1049.07	0.9917	4.77128	3.26145	26.0656	-6.8191
0.24512	-58.0416	-6.93245	7550000	0.00337085	0.0636009	0.495247	0.991203	1050	0.00336917	0.0653232	0.499677	1048.58	0.991676	4.6952	3.3204	26.0656	-7.01775
0.24736	-58.6551	-7.1332	7550000	0.00340647	0.0642731	0.496985	0.991203	1050	0.00340466	0.0671073	0.504186	1047.73	0.99171	4.6201	3.38059	26.0656	-7.22268
0.25024	-57.501	-6.72207	7550000	0.00333945	0.0630085	0.493704	0.991203	1050	0.00333796	0.0634503	0.494855	1049.61	0.991623	4.77757	3.25663	26.0656	-6.8029
0.24736	-58.1693	-6.91629	7550000	0.00337826	0.0637408	0.49561	0.991203	1050	0.00337668	0.0651773	0.499305	1048.81	0.991647	4.70147	3.31546	26.0656	-7.00098
0.25248	-58.2597	-6.92942	7550000	0.00338351	0.0638399	0.495866	0.991203	1050	0.00338194	0.0652934	0.499601	1048.8	0.991642	4.69646	3.31939	26.0656	-7.0143
0.2496	-58.2524	-6.96072	7550000	0.00338309	0.0638319	0.495845	0.991203	1050	0.00338145	0.0655729	0.500313	1048.57	0.991663	4.68449	3.32886	26.0656	-7.0464
0.2528	-57.9493	-6.59592	7550000	0.00336549	0.0634998	0.494984	0.991203	1050	0.00336449	0.0623165	0.49189	1050.99	0.991475	4.8293	3.21772	26.0656	-6.67299
0.25376	-58.3752	-6.66414	7550000	0.00339022	0.0639664	0.496194	0.991203	1050	0.00338928	0.062922	0.493478	1050.86	0.991456	4.80142	3.23853	26.0656	-6.74226
0.24864	-56.1561	-7.00303	7550000	0.00326134	0.0615348	0.489825	0.991203	1050	0.00325868	0.065979	0.501344	1046.39	0.991992	4.66739	3.34259	26.0656	-7.09329
0.25952	-55.6961	-6.06054	7550000	0.00323463	0.0610308	0.488484	0.991203	1050	0.00323374	0.0575438	0.478998	1053.2	0.991453	5.06475	3.05125	26.0656	-6.12803
0.25152	-54.455	-6.41076	7550000	0.00316255	0.0596708	0.484828	0.991203	1050	0.00316033	0.0607002	0.4876	1049.06	0.991879	4.90597	3.16183	26.0656	-6.48843
0.26144	-56.8542	-6.95507	7550000	0.00330189	0.0622998	0.491846	0.991203	1050	0.00329963	0.0655408	0.500231	1047.34	0.991862	4.68596	3.32777	26.0656	-7.04287
0.25888	-56.7346	-6.67078	7550000	0.00329494	0.0621687	0.491501	0.991203	1050	0.0032932	0.063001	0.493685	1049.27	0.991704	4.79795	3.24124	26.0656	-6.75149
0.26816	-56.0579	-6.79136	7550000	0.00325564	0.0614272	0.489539	0.991203	1050	0.00325335	0.0640881	0.496508	1047.76	0.991879	4.74921	3.27841	26.0656	-6.8762
0.26816	-56.4152	-6.77563	7550000	0.00327639	0.0618187	0.490577	0.991203	1050	0.0032743	0.0639428	0.496132	1048.21	0.991817	4.75563	3.27346	26.0656	-6.85949
0.26688	-56.4191	-7.09464	7550000	0.00327662	0.061823	0.490588	0.991203	1050	0.00327389	0.0667941	0.5034	1046.01	0.992008	4.6332	3.37006	26.0656	-7.1869
0.26688	-56.5651	-6.55392	7550000	0.0032851	0.061983	0.491011	0.991203	1050	0.00328353	0.0619569	0.490942	1050	0.991654	4.84614	3.20532	26.0656	-6.63197
0.26944	-57.6091	-7.12845	7550000	0.00334573	0.063127	0.494013	0.991203	1050	0.00334345	0.0670791	0.504115	1046.84	0.991857	4.62133	3.37964	26.0656	-7.21956
0.26816	-56.5551	-6.98791	7550000	0.00328452	0.061972	0.490982	0.991203	1050	0.00328206	0.0658383	0.500987	1046.85	0.991925	4.67332	3.33783	26.0656	-7.07708
0.26752	-56.6789	-6.82777	7550000	0.00329171	0.0621077	0.49134	0.991203	1050	0.00328962	0.0644055	0.497326	1048.08	0.99181	4.73517	3.28923	26.0656	-6.91255
0.2656	-57.7347	-7.01694	7550000	0.00335303	0.0632647	0.494372	0.991203	1050	0.00335103	0.0660816	0.501603	1047.71	0.991772	4.66294	3.34605	26.0656	-7.1049
0.272	-57.6581	-7.27481	7550000	0.00334857	0.0631806	0.494153	0.991203	1050	0.00334603	0.0683845	0.507364	1045.93	0.991935	4.56834	3.42335	26.0656	-7.36976
0.2672	-56.7141	-6.74505	7550000	0.00329375	0.0621462	0.491442	0.991203	1050	0.00329185	0.0636655	0.495414	1048.71	0.991754	4.76798	3.26399	26.0656	-6.82766
0.2656	-56.0121	-6.65585	7550000	0.00325298	0.061377	0.489406	0.991203	1050	0.00325095	0.0628764	0.493359	1048.7	0.991802	4.80368	3.23696	26.0656	-6.73729
0.27072	-57.8184	-7.02033	7550000	0.00335788	0.0633563	0.494611	0.991203	1050	0.00335592	0.0661108	0.501677	1047.76	0.991762	4.6617	3.34704	26.0656	-7.10825
0.26816	-56.5526	-6.90869	7550000	0.00328437	0.0619693	0.490975	0.991203	1050	0.00328207	0.0651305	0.499185	1047.39	0.991878	4.70361	3.31387	26.0656	-6.99578
0.2688	-56.5408	-6.80765	7550000	0.00328368	0.0619563	0.490941	0.991203	1050	0.00328158	0.0642274	0.496867	1048.09	0.991818	4.74302	3.28316	26.0656	-6.89213
0.2784	-57.0514	-6.25257	7550000	0.00331334	0.0625158	0.492414	0.991203	1050	0.00331268	0.0592523	0.483692	1052.91	0.991378	4.97698	3.11135	26.0656	-6.32274
0.27904	-56.9684	-6.57887	7550000	0.00330852	0.0624249	0.492175	0.991203	1050	0.00330709	0.0621754	0.491519	1050.19	0.99161	4.83592	3.21286	26.0656	-6.65695
0.2832	-56.7253	-6.70141	7550000	0.0032944	0.0621585	0.491474	0.991203	1050	0.0032926	0.0632751	0.494399	1049.04	0.991725	4.78553	3.25063	26.0656	-6.7829
0.27712	-56.98	-7.03033	7550000	0.00330919	0.0624376	0.492209	0.991203	1050	0.00330684	0.0662113	0.501932	1046.94	0.991889	4.65753	3.35043	26.0656	-7.1199
0.27808	-56.104	-5.95024	7550000	0.00325832	0.0614777	0.489673	0.991203	1050	0.00325789	0.0565492	0.476222	1054.61	0.99131	5.11767	3.01599	26.0656	-6.01472
0.27616	-57.1099	-7.00076	7550000	0.00331674	0.0625799	0.492582	0.991203	1050	0.00331449	0.0659455	0.501259	1047.26	0.991853	4.66873	3.34146	26.0656	-7.08934
0.27744	-57.6531	-6.91719	7550000	0.00334828	0.0631751	0.494139	0.991203	1050	0.00334646	0.0651919	0.499342	1048.33	0.991723	4.70088	3.31595	26.0656	-7.00272
0.27776	-56.8513	-6.70363	7550000	0.00330172	0.0622966	0.491838	0.991203	1050	0.00329997	0.0632934	0.494447	1049.14	0.991707	4.78469	3.25126	26.0656	-6.78499
0.28096	-56.7287	-6.86468	7550000	0.0032946	0.0621623	0.491484	0.991203	1050	0.00329246	0.0647348	0.498172	1047.86	0.991826	4.72076	3.30043	26.0656	-6.95034
0.28928	-56.4829	-6.27082	7550000	0.00328032	0.0618929	0.490773	0.991203	1050	0.00327934	0.0594219	0.484153	1052.19	0.991478	4.96854	3.11729	26.0656	-6.34217
0.29184	-57.3794	-6.98955	7550000	0.00333239	0.0628752	0.493356	0.991203	1050	0.00333029	0.0658417	0.500996	1047.58	0.991807	4.67311	3.33795	26.0656	-7.07739
0.29504	-56.8827	-6.89186	7550000	0.00330354	0.062331	0.491928	0.991203	1050	0.00330142	0.0649757	0.49879	1047.81	0.99182	4.71028	3.30861	26.0656	-6.97797
0.29952	-56.6068	-6.66171	7550000	0.00328752	0.0620287	0.491132	0.991203	1050	0.00328574	0.0629214	0.493477	1049.22	0.991717	4.80159	3.2385	26.0656	-6.74238
0.31104	-57.0919	-7.04588	7550000	0.00331569	0.0625602	0.492531	0.991203	1050	0.00331335	0.0663487	0.502278	1046.94	0.991882	4.65175	3.35506	26.0656	-7.13567
0.30976	-57.3776	-6.87679	7550000	0.00333228	0.0628733	0.493351	0.991203	1050	0.00333041	0.0648346	0.498428	1048.37	0.991738	4.71637	3.30382	26.0656	-6.96172
0.30016	-57.9749	-7.05196	7550000	0.00336698	0.0635278	0.495057	0.991203	1050	0.00336502	0.066391	0.502385	1047.68	0.991759	4.64991	3.35649	26.0656	-7.14045
0.30848	-57.2214	-6.72401	7550000	0.00332321	0.0627021	0.492903	0.991203	1050	0.00332159	0.063471	0.494909	1049.33	0.991666	4.77666	3.25734	26.0656	-6.80531
0.30752	-56.9273	-6.83015	7550000	0.00330613	0.0623799	0.492057	0.991203	1050	0.00330416	0.0644235	0.497373	1048.29	0.991775	4.73436	3.28984	26.0656	-6.91459
0.31136	-56.6828	-6.58575	7550000	0.00329193	0.0621119	0.491351	0.991203	1050	0.00329035	0.0622404	0.49169	1049.87	0.991657	4.83293	3.2151	26.0656	-6.66442
0.28	-56.9647	-6.40963	7550000	0.00330831	0.0624209	0.492165	0.991203	1050	0.00330725	0.0606603	0.487493	1051.52	0.991499	4.90769	3.16045	26.0656	-6.48361
0.27584	-57.1706	-6.62848	7550000	0.00332026	0.0626465	0.492757	0.991203	1050	0.00331882	0.0626169	0.492679	1050	0.991612	4.81551	3.22805	26.0656	-6.70748
0.27648	-56.1816	-6.82894	7550000	0.00326283	0.0615628	0.489899	0.991203	1050	0.00326052	0.0644226	0.49737	1047.61	0.991884	4.73446	3.28981	26.0656	-6.91456
0.27872	-56.5401	-7.0228	7550000	0.00328365	0.0619556	0.490939	0.991203	1050	0.00328111	0.0661502	0.501777	1046.6	0.991948	4.66013	3.34837	26.0656	-7.11292
0.2832	-57.4565	-7.03582	7550000	0.00333687	0.0629597	0.493577	0.991203	1050	0.00333471	0.0662538	0.502039	1047.33	0.991824	4.65571	3.35186	26.0656	-7.12473
0.28608	-57.668	-7.37742	7550000	0.00334915	0.0631915	0.494182	0.991203	1050	0.00334641	0.0692999	0.509618	1045.29	0.991993	4.53213	3.45383	26.0656	-7.47516
0.28032	-57.2243	-7.15928	7550000	0.00332338	0.0627053	0.492911	0.991203	1050	0.00332088	0.0673596	0.504817	1046.3	0.99193	4.60984	3.38906	26.0656	-7.25187
0.28864	-57.43	-7.03821	7550000	0.00333533	0.0629307	0.493501	0.991203	1050	0.00333315	0.0662756	0.502094	1047.29	0.991829	4.6548	3.3526	26.0656	-7.12723
0.2896	-57.9575	-7.08754	7550000	0.00336596	0.0635087	0.495007	0.991203	1050	0.00336392	0.0667088	0.503186	1047.43	0.991782	4.63666	3.36719	26.0656	-7.17698
0.27904	-56.9923	-7.08331	7550000	0.00330991	0.0624511	0.492244	0.991203	1050	0.00330745	0.0666848	0.503125	1046.6	0.991919	4.63769	3.36638	26.0656	-7.17427
0.28928	-57.3282	-6.75099	7550000	0.00332942	0.0628192	0.493209	0.991203	1050	0.00332779	0.0637109	0.495532	1049.23	0.991667	4.7659	3.26554	26.0656	-6.8328
0.28928	-57.7888	-7.181	7550000	0.00335616	0.0633238	0.494526	0.991203	1050	0.00335386	0.0675455	0.505281	1046.65	0.991862	4.60222	3.39529	26.0656	-7.2732
0.2864	-56.1259	-6.71093	7550000	0.00325959	0.0615017	0.489737	0.991203	1050	0.0032575	0.0633678	0.494641	1048.41	0.991819	4.78139	3.2538	26.0656	-6.7936
0.28832	-57.5901	-6.87576	7550000	0.00334463	0.0631061	0.493959	0.991203	1050	0.00334286	0.0648226	0.498398	1048.57	0.991707	4.71687	3.30342	26.0656	-6.96032
0.29376	-57.6267	-7.0489	7550000	0.00334675	0.0631462	0.494064	0.991203	1050	0.00334464	0.0663683	0.502328	1047.4	0.991807	4.65089	3.35572	26.0656	-7.13788
0.29952	-58.5618	-7.39253	7550000	0.00340106	0.0641709	0.496722	0.991203	1050	0.00339868	0.06942	0.509912	1045.96	0.991875	4.52747	3.45782	26.0656	-7.48906
0.29568	-58.1722	-7.29196	7550000	0.00337843	0.063744	0.495618	0.991203	1050	0.00337608	0.0685301	0.507724	1046.26	0.991872	4.56251	3.4282	26.0656	-7.38647
0.29664	-58.3179	-6.81965	7550000	0.0033869	0.0639037	0.496031	0.991203	1050	0.00338559	0.0643123	0.497086	1049.64	0.991565	4.73914	3.28606	26.0656	-6.90168
0.29184	-57.3508	-6.73437	7550000	0.00333073	0.0628439	0.493274	0.991203	1050	0.00332915	0.063562	0.495146	1049.38	0.991653	4.77256	3.26045	26.0656	-6.81573
0.2944	-58.4181	-7.01722	7550000	0.00339271	0.0640134	0.496315	0.991203	1050	0.00339103	0.0660752	0.501587	1048.32	0.991673	4.66316	3.34583	26.0656	-7.10409
0.29952	-56.9481	-6.76218	7550000	0.00330734	0.0624027	0.492117	0.991203	1050	0.00330552	0.0638157	0.495804	1048.8	0.99173	4.76125	3.26912	26.0656	-6.84487
0.29472	-57.6933	-7.28293	7550000	0.00335062	0.0632193	0.494254	0.991203	1050	0.00334808	0.0684565	0.507542	1045.91	0.991935	4.56547	3.42575	26.0656	-7.37804
0.29504	-52.2648	-6.52959	7550000	0.00303535	0.0572708	0.478239	0.991203	1050	0.00303199	0.061795	0.490514	1046.07	0.992282	4.85406	3.19974	26.0656	-6.61391
0.29088	-57.0174	-6.51948	7550000	0.00331137	0.0624787	0.492316	0.991203	1050	0.00331009	0.0616433	0.490112	1050.7	0.991564	4.86081	3.1945	26.0656	-6.59603
0.30304	-58.2458	-7.39321	7550000	0.0033827	0.0638246	0.495827	0.991203	1050	0.00338019	0.0694305	0.509938	1045.68	0.99192	4.52709	3.45817	26.0656	-7.49033
0.29952	-57.1585	-6.74842	7550000	0.00331956	0.0626332	0.492722	0.991203	1050	0.00331786	0.06369	0.495478	1049.09	0.99169	4.76684	3.26483	26.0656	-6.83043
0.29568	-57.6351	-7.24969	7550000	0.00334724	0.0631555	0.494088	0.991203	1050	0.00334474	0.0681603	0.506809	1046.07	0.991924	4.57736	3.41586	26.0656	-7.344
0.30016	-57.8341	-6.77589	7550000	0.00335879	0.0633735	0.494656	0.991203	1050	0.00335735	0.0639273	0.496092	1049.52	0.991608	4.75622	3.27293	26.0656	-6.85756
0.29728	-58.2381	-7.09502	7550000	0.00338226	0.0638162	0.495805	0.991203	1050	0.00338033	0.0667723	0.503345	1047.62	0.991747	4.63397	3.36933	26.0656	-7.18419
0.29952	-58.3318	-7.16891	7550000	0.0033877	0.0639189	0.496071	0.991203	1050	0.00338567	0.0674302	0.504993	1047.21	0.991777	4.60688	3.39142	26.0656	-7.25987
0.32224	-57.4526	-7.67978	7550000	0.00333664	0.0629555	0.493566	0.991203	1050	0.00333325	0.0719968	0.516145	1043.3	0.992189	4.42983	3.54286	26.0656	-7.78646
0.30208	-57.8662	-7.13263	7550000	0.00336066	0.0634088	0.494747	0.991203	1050	0.00335849	0.0671129	0.5042	1047.04	0.991823	4.61992	3.38078	26.0656	-7.22342
0.30272	-57.6676	-7.08258	7550000	0.00334912	0.063191	0.494181	0.991203	1050	0.00334697	0.0666685	0.503084	1047.2	0.991821	4.63836	3.36583	26.0656	-7.17238
0.30528	-57.9596	-7.07701	7550000	0.00336609	0.0635111	0.495013	0.991203	1050	0.00336407	0.0666148	0.502949	1047.5	0.991776	4.64057	3.36403	26.0656	-7.16617
0.30112	-57.2398	-7.19094	7550000	0.00332428	0.0627223	0.492956	0.991203	1050	0.00332172	0.0676419	0.505521	1046.11	0.991946	4.59833	3.39852	26.0656	-7.28435
0.30176	-57.4523	-6.56304	7550000	0.00333662	0.0629551	0.493565	0.991203	1050	0.00333546	0.0620281	0.49113	1050.77	0.991527	4.84274	3.20778	26.0656	-6.64002
0.30528	-57.4541	-7.17378	7550000	0.00333673	0.0629571	0.49357	0.991203	1050	0.00333429	0.0674857	0.505131	1046.41	0.991906	4.60468	3.39328	26.0656	-7.26636
0.30432	-58.2574	-6.75309	7550000	0.00338338	0.0638374	0.49586	0.991203	1050	0.00338219	0.0637184	0.495551	1050.08	0.991531	4.76549	3.26579	26.0656	-6.83356
0.30912	-56.9782	-6.75806	7550000	0.00330909	0.0624357	0.492204	0.991203	1050	0.00330729	0.0637784	0.495707	1048.86	0.991723	4.76291	3.26785	26.0656	-6.84059
0.31424	-57.6893	-6.54442	7550000	0.00335039	0.0632149	0.494243	0.991203	1050	0.00334938	0.0618588	0.490683	1051.15	0.99148	4.85063	3.20194	26.0656	-6.62062
0.3136	-57.6058	-7.02374	7550000	0.00334554	0.0631234	0.494004	0.991203	1050	0.00334347	0.066144	0.501762	1047.55	0.991795	4.66032	3.34816	26.0656	-7.1121
0.3136	-57.968	-7.0589	7550000	0.00336658	0.0635203	0.495037	0.991203	1050	0.0033646	0.0664531	0.502542	1047.63	0.991764	4.64732	3.35858	26.0656	-7.14758
0.31584	-57.4688	-6.98602	7550000	0.00333758	0.0629733	0.493612	0.991203	1050	0.00333553	0.0658091	0.500913	1047.68	0.991792	4.67449	3.33685	26.0656	-7.07362

## Sheet: HxWxL=3x3x100 | d=0.7
Transit time of particle Dt (sec)	Signal at antinode Df_anti (Hz)	Signal Df_max near node (Hz)	baseline frequency f (Hz)	nominal buoyant mass m_bnom (pg)	reference volume V_ref (um3)	reference diameter d_ref (um)	nominal alpha_m	nominal density rho_nom (kg/m3)	measured buoyant mass m_b (pg)	measured volume V_meas (um3)	measured diameter d_meas (um)	measured density rho_p (kg/m3)	measured alpha_m	measured alpha_v	measured beta(R/H)^2	measured beta	Signal at node Df_node(Hz)
0.2256	-3.5358	-0.065463	3.06554e+06	0.00952433	0.179704	0.700143	0.991449	1050	0.00950242	0.236851	0.767642	1037.12	0.993713	2.25203	3.18192	194.39	-0.0655807
0.2309	-3.61436	-0.0874801	3.06554e+06	0.00973593	0.183697	0.70529	0.991449	1050	0.00970911	0.283034	0.814604	1031.3	0.994166	2.23764	3.58315	194.39	-0.0876862
0.21335	-3.47554	-0.0532455	3.06554e+06	0.009362	0.176642	0.696142	0.991449	1050	0.00934344	0.208809	0.736067	1041.75	0.993397	2.25909	2.92554	194.39	-0.0533245
0.21435	-3.58731	-0.0666587	3.06554e+06	0.00966308	0.182322	0.703526	0.991449	1050	0.00964138	0.239486	0.770478	1037.26	0.993659	2.25128	3.20547	194.39	-0.0667789
0.21495	-3.49023	-0.0250074	3.06554e+06	0.00940156	0.177388	0.697122	0.991449	1050	0.00939897	0.132721	0.632868	1067.82	0.9917	2.25628	2.16271	194.39	-0.0250246
0.2058	-3.45103	-0.0278411	3.06554e+06	0.009296	0.175396	0.694502	0.991449	1050	0.00929027	0.141424	0.646411	1062.69	0.992038	2.25982	2.25626	194.39	-0.0278628
0.17305	-3.71853	-0.0985587	3.06554e+06	0.0100166	0.188992	0.712002	0.991449	1050	0.00998823	0.304659	0.834844	1029.78	0.994239	2.23039	3.76341	194.39	-0.0988133
0.2075	-3.49821	-0.0324493	3.06554e+06	0.00942306	0.177794	0.697653	0.991449	1050	0.00941501	0.15492	0.666351	1057.77	0.992276	2.26293	2.3976	194.39	-0.0324783
0.18405	-3.60544	-0.177521	3.06554e+06	0.00971191	0.183244	0.704709	0.991449	1050	0.00967229	0.439576	0.943362	1019	0.995488	2.18553	4.80539	194.39	-0.178384
0.17205	-3.64741	-0.160454	3.06554e+06	0.00982495	0.185376	0.707433	0.991449	1050	0.00978713	0.412601	0.923657	1020.72	0.995259	2.19415	4.60674	194.39	-0.161149
0.22955	-3.55692	-0.0884818	3.06554e+06	0.0095812	0.180777	0.701534	0.991449	1050	0.0095537	0.285036	0.81652	1030.52	0.994282	2.23698	3.60003	194.39	-0.0886962
0.227	-3.49981	-0.101445	3.06554e+06	0.00942736	0.177875	0.697759	0.991449	1050	0.00939697	0.310184	0.83986	1027.29	0.994634	2.22852	3.80878	194.39	-0.101732
0.2274	-3.67038	-0.103835	3.06554e+06	0.00988683	0.186544	0.708915	0.991449	1050	0.00985711	0.314664	0.843884	1028.33	0.994416	2.227	3.84536	194.39	-0.104122
0.18855	-3.66612	-0.0407518	3.06554e+06	0.00987537	0.186328	0.708641	0.991449	1050	0.00986538	0.177597	0.697396	1052.55	0.992431	2.26364	2.62622	194.39	-0.0407955
0.1807	-3.45343	-0.0531356	3.06554e+06	0.00930244	0.175518	0.694663	0.991449	1050	0.00928364	0.208548	0.73576	1041.52	0.993435	2.25914	2.9231	194.39	-0.0532148
0.19385	-3.59371	-0.0259378	3.06554e+06	0.0096803	0.182647	0.703944	0.991449	1050	0.00967921	0.135614	0.637434	1068.37	0.991538	2.25761	2.19403	194.39	-0.0259559
0.22645	-3.61674	-0.0367116	3.06555e+06	0.00974235	0.183818	0.705445	0.991449	1050	0.00973382	0.166794	0.682958	1055.36	0.992296	2.26387	2.5186	194.39	-0.0367476
0.20915	-3.58132	-0.0686393	3.06555e+06	0.00964694	0.182018	0.703134	0.991449	1050	0.00962458	0.24382	0.775099	1036.47	0.99373	2.25002	3.24404	194.39	-0.068767
0.2384	-3.55577	-0.101933	3.06555e+06	0.0095781	0.180719	0.701458	0.991449	1050	0.00954796	0.311099	0.840685	1027.69	0.994557	2.22821	3.81626	194.39	-0.102219
0.1951	-3.59965	-0.0864667	3.06554e+06	0.00969629	0.182949	0.704331	0.991449	1050	0.00966957	0.281008	0.812656	1031.41	0.994167	2.23831	3.56604	194.39	-0.0866689
0.2382	-3.47853	-0.0957393	3.06554e+06	0.00937006	0.176794	0.696342	0.991449	1050	0.00934056	0.299271	0.829893	1028.21	0.994558	2.23221	3.71892	194.39	-0.0959964
0.203	-3.585	-0.0205063	3.06554e+06	0.00965686	0.182205	0.703375	0.991449	1050	0.00966105	0.118117	0.608749	1078.79	0.990997	2.24661	2.00101	194.39	-0.0205176
0.19525	-3.74062	-0.134879	3.06554e+06	0.010076	0.190114	0.713409	0.991449	1050	0.0100417	0.370188	0.890857	1024.13	0.994816	2.20815	4.28537	194.39	-0.135356
0.19865	-3.6033	-0.0708394	3.06555e+06	0.00970613	0.183135	0.70457	0.991449	1050	0.00968338	0.248581	0.780111	1035.95	0.993757	2.2486	3.28613	194.39	-0.0709747
0.2085	-3.32024	-0.0277019	3.06555e+06	0.00894367	0.168749	0.685615	0.991449	1050	0.00893552	0.141007	0.645774	1060.37	0.992332	2.25968	2.25182	194.39	-0.0277242
0.1865	-3.59798	-0.145136	3.06555e+06	0.0096918	0.182864	0.704223	0.991449	1050	0.00965558	0.38754	0.904564	1021.92	0.995147	2.20236	4.41825	194.39	-0.145711
0.1704	-3.51075	-0.0960418	3.06555e+06	0.00945683	0.178431	0.698485	0.991449	1050	0.00942749	0.299851	0.830428	1028.44	0.994513	2.23202	3.72372	194.39	-0.096298
0.16435	-3.6899	-0.0137762	3.06555e+06	0.0099394	0.187536	0.710169	0.991449	1050	0.0099565	0.0938494	0.563825	1103.09	0.989725	2.21388	1.71657	194.39	-0.0137811
0.18715	-3.58892	-0.03977	3.06555e+06	0.00966739	0.182404	0.703631	0.991449	1050	0.00965658	0.175011	0.693994	1052.18	0.992537	2.26378	2.60066	194.39	-0.0398126
0.16595	-3.59468	-0.038405	3.06555e+06	0.00968292	0.182697	0.704008	0.991449	1050	0.00967298	0.171373	0.689151	1053.44	0.992446	2.26389	2.56449	194.39	-0.0384447
0.2128	-3.52693	-0.0178848	3.06555e+06	0.00950042	0.179253	0.699556	0.991449	1050	0.00950626	0.109073	0.592798	1084.15	0.990818	2.23745	1.89752	194.39	-0.0178935
0.17755	-3.62123	-0.0629646	3.06555e+06	0.00975441	0.184046	0.705736	0.991449	1050	0.00973428	0.231274	0.761569	1039.09	0.993478	2.25358	3.13178	194.39	-0.0630707
0.1585	-3.6561	-0.117281	3.06555e+06	0.00984836	0.185818	0.707994	0.991449	1050	0.00981623	0.339361	0.865408	1025.93	0.994672	2.21858	4.04403	194.39	-0.117649
0.18535	-3.39165	-0.0068467	3.06555e+06	0.009136	0.172377	0.690495	0.991449	1050	0.00915931	0.0635435	0.495098	1141.14	0.988904	2.10718	1.32359	194.39	-0.00684802
0.1614	-3.53932	-0.0950056	3.06555e+06	0.00953377	0.179883	0.700374	0.991449	1050	0.00950482	0.297842	0.82857	1028.91	0.994448	2.23269	3.70707	194.39	-0.0952543
0.19825	-3.54429	-0.0135937	3.06555e+06	0.00954718	0.180135	0.700702	0.991449	1050	0.00955994	0.093138	0.562397	1099.64	0.990104	2.21246	1.70788	194.39	-0.0135987
0.18955	-3.66589	-0.106725	3.06555e+06	0.00987473	0.186316	0.708626	0.991449	1050	0.00984445	0.320064	0.848684	1027.76	0.994477	2.22516	3.88924	194.39	-0.107029
0.191	-3.53648	-0.0558693	3.06555e+06	0.00952614	0.179738	0.700187	0.991449	1050	0.00950739	0.215009	0.74328	1041.22	0.993382	2.2577	2.98316	194.39	-0.0559548
0.2261	-3.63586	-0.191163	3.06555e+06	0.00979383	0.184789	0.706685	0.991449	1050	0.00975302	0.460459	0.95807	1018.18	0.995576	2.17902	4.95641	194.39	-0.192158
0.23145	-3.66271	-0.0694832	3.06555e+06	0.00986616	0.186154	0.708421	0.991449	1050	0.00984446	0.245647	0.77703	1037.08	0.993612	2.24948	3.26022	194.39	-0.0696111
0.25795	-3.50084	-0.0544867	3.06555e+06	0.00943013	0.177927	0.697827	0.991449	1050	0.00941143	0.211756	0.739512	1041.44	0.993397	2.25844	2.953	194.39	-0.0545689
0.1942	-3.5144	-0.0165361	3.06555e+06	0.00946666	0.178616	0.698727	0.991449	1050	0.00947396	0.104233	0.583896	1087.89	0.990663	2.23123	1.84096	194.39	-0.0165436

## Sheet: HxWxL=3x3x100 | d=1.1
Transit time of particle Dt (sec)	Signal at antinode Df_anti (Hz)	Signal Df_max near node (Hz)	baseline frequency f (Hz)	nominal buoyant mass m_bnom (pg)	reference volume V_ref (um3)	reference diameter d_ref (um)	nominal alpha_m	nominal density rho_nom (kg/m3)	measured buoyant mass m_b (pg)	measured volume V_meas (um3)	measured diameter d_meas (um)	measured density rho_p (kg/m3)	measured alpha_m	measured alpha_v	measured beta(R/H)^2	measured beta	Signal at node Df_node(Hz)
0.37385	-13.9049	-0.526186	3.06563e+06	0.0376177	0.709769	1.10672	0.987141	1050	0.0375579	0.868478	1.18373	1040.25	0.988693	2.07999	7.56644	194.396	-0.52814
0.3238	-13.9335	-0.377881	3.06563e+06	0.0376952	0.71123	1.10748	0.987141	1050	0.0377009	0.704667	1.10407	1050.5	0.986971	2.114	6.58225	194.396	-0.37888
0.31095	-14.2685	-0.770284	3.06563e+06	0.0386013	0.728327	1.11629	0.987141	1050	0.0384822	1.1054	1.28284	1031.81	0.990175	2.04023	8.8865	194.396	-0.774403
0.3912	-14.0321	-0.516819	3.06563e+06	0.0379619	0.716261	1.11009	0.987141	1050	0.0379088	0.858654	1.17925	1041.15	0.988501	2.08185	7.50927	194.396	-0.518686
0.3657	-13.9784	-0.438799	3.06563e+06	0.0378165	0.713519	1.10867	0.987141	1050	0.0377935	0.774331	1.13931	1045.81	0.987721	2.09875	7.00922	194.396	-0.440145
0.37145	-14.0504	-0.553751	3.06563e+06	0.0380113	0.717194	1.11057	0.987141	1050	0.0379459	0.896954	1.19653	1039.31	0.988822	2.07468	7.73094	194.396	-0.555894
0.3056	-13.9795	-0.506108	3.06563e+06	0.0378196	0.713578	1.1087	0.987141	1050	0.0377691	0.847371	1.17406	1041.57	0.988441	2.08402	7.44334	194.396	-0.507904
0.3175	-14.0015	-0.521382	3.06563e+06	0.037879	0.714699	1.10928	0.987141	1050	0.0378235	0.863443	1.18144	1040.81	0.988569	2.08094	7.53716	194.396	-0.523286
0.2152	-13.954	-0.418757	3.06563e+06	0.0377506	0.712276	1.10803	0.987141	1050	0.0377362	0.751821	1.12816	1047.19	0.987499	2.10355	6.87272	194.396	-0.419984
0.2289	-13.988	-0.521466	3.06563e+06	0.0378426	0.714011	1.10892	0.987141	1050	0.0377867	0.863533	1.18148	1040.76	0.988581	2.08092	7.53769	194.396	-0.523373
0.21945	-13.8432	-0.602676	3.06563e+06	0.0374507	0.706618	1.10508	0.987141	1050	0.037365	0.946349	1.2181	1036.48	0.989385	2.06585	8.01222	194.396	-0.605259
0.2356	-14.0379	-0.554403	3.06563e+06	0.0379775	0.716556	1.11024	0.987141	1050	0.0379115	0.897624	1.19683	1039.24	0.988838	2.07456	7.73479	194.396	-0.556554
0.21535	-13.903	-0.496933	3.06563e+06	0.0376126	0.709672	1.10667	0.987141	1050	0.0375633	0.83764	1.16955	1041.84	0.988415	2.08592	7.38625	194.396	-0.498673
0.24605	-13.9456	-0.428306	3.06563e+06	0.0377278	0.711846	1.1078	0.987141	1050	0.0377086	0.762595	1.13353	1046.45	0.987624	2.10124	6.93822	194.396	-0.429591
0.22565	-14.1439	-0.636356	3.06563e+06	0.0382644	0.721969	1.11303	0.987141	1050	0.0381759	0.979433	1.23214	1035.98	0.989406	2.06019	8.19789	194.396	-0.639177
0.259	-13.9497	-0.51828	3.06563e+06	0.037739	0.712057	1.10791	0.987141	1050	0.0376832	0.8602	1.17996	1040.81	0.988583	2.08156	7.51828	194.396	-0.520169
0.2621	-14.0786	-0.64221	3.06563e+06	0.0380876	0.718633	1.11131	0.987141	1050	0.037996	0.985141	1.23452	1035.57	0.989498	2.05923	8.2297	194.396	-0.645097
0.231	-13.8201	-0.526308	3.06563e+06	0.0373882	0.705438	1.10447	0.987141	1050	0.037326	0.868619	1.1838	1039.97	0.988764	2.07996	7.56725	194.396	-0.528275
0.25385	-13.9693	-0.483133	3.06563e+06	0.0377919	0.713054	1.10843	0.987141	1050	0.0377498	0.822857	1.16263	1042.88	0.988219	2.08884	7.29908	194.396	-0.484769
0.23005	-13.931	-0.521836	3.06563e+06	0.0376883	0.7111	1.10742	0.987141	1050	0.0376307	0.863929	1.18166	1040.56	0.988632	2.08085	7.53999	194.396	-0.523754
0.2217	-13.6951	-0.369682	3.06563e+06	0.0370502	0.69906	1.10113	0.987141	1050	0.0370517	0.695012	1.099	1050.31	0.987079	2.11622	6.52199	194.396	-0.370656
0.25205	-13.9094	-0.360099	3.06563e+06	0.0376299	0.709999	1.10684	0.987141	1050	0.0376447	0.683586	1.09294	1052.07	0.986732	2.11887	6.45032	194.396	-0.361008
0.21635	-13.8693	-0.430905	3.06563e+06	0.0375214	0.707951	1.10578	0.987141	1050	0.0374985	0.76552	1.13497	1045.98	0.987724	2.10062	6.95595	194.396	-0.432213
0.24485	-13.8856	-0.459919	3.06563e+06	0.0375655	0.708784	1.10621	0.987141	1050	0.0375305	0.797668	1.15064	1044.05	0.988042	2.09392	7.14936	194.396	-0.46141
0.258	-14.0249	-0.540064	3.06563e+06	0.0379424	0.715894	1.1099	0.987141	1050	0.0378809	0.882873	1.19024	1039.91	0.988722	2.07728	7.64982	194.396	-0.542105
0.22375	-13.907	-0.479848	3.06563e+06	0.0376233	0.709874	1.10678	0.987141	1050	0.0375808	0.819326	1.16097	1042.87	0.988237	2.08954	7.27819	194.396	-0.481469
0.2258	-13.8402	-0.467211	3.06563e+06	0.0374427	0.706466	1.10501	0.987141	1050	0.0374033	0.805638	1.15446	1043.43	0.988161	2.09229	7.1969	194.396	-0.468755
0.23	-14.3888	-0.568788	3.06563e+06	0.0389267	0.734466	1.11941	0.987141	1050	0.0388652	0.91223	1.20329	1039.6	0.988683	2.0719	7.81847	194.396	-0.570996
0.2193	-13.9476	-0.576626	3.06563e+06	0.0377332	0.711948	1.10786	0.987141	1050	0.0376578	0.920235	1.20679	1037.92	0.989097	2.07046	7.86415	194.396	-0.57897
0.2748	-13.9732	-0.503016	3.06563e+06	0.0378025	0.713255	1.10853	0.987141	1050	0.0377529	0.844096	1.17255	1041.73	0.988416	2.08466	7.42415	194.396	-0.504791
0.2311	-14.0272	-0.554112	3.06563e+06	0.0379487	0.716012	1.10996	0.987141	1050	0.0378825	0.897328	1.1967	1039.22	0.988844	2.07461	7.73309	194.396	-0.556262
0.2901	-13.9305	-0.574275	3.06563e+06	0.037687	0.711076	1.1074	0.987141	1050	0.0376119	0.917863	1.20576	1037.98	0.989091	2.07089	7.85062	194.396	-0.576602
0.2818	-13.9314	-0.512892	3.06563e+06	0.0376894	0.711121	1.10743	0.987141	1050	0.037635	0.854539	1.17736	1041.04	0.988547	2.08264	7.48526	194.396	-0.514744
0.2568	-13.8691	-0.322189	3.06563e+06	0.0375208	0.707939	1.10577	0.987141	1050	0.0375576	0.637343	1.06772	1055.93	0.986152	2.13	6.15603	194.396	-0.322917
0.24185	-14.0487	-0.56444	3.06563e+06	0.0380067	0.717108	1.11053	0.987141	1050	0.0379377	0.907867	1.20136	1038.79	0.988916	2.07269	7.79352	194.396	-0.566668
0.26115	-13.7779	-0.550498	3.06563e+06	0.0372742	0.703287	1.10334	0.987141	1050	0.0372029	0.893662	1.19507	1038.63	0.989013	2.07529	7.71201	194.396	-0.552659
0.3051	-14.029	-0.473282	3.06563e+06	0.0379534	0.716101	1.11001	0.987141	1050	0.0379171	0.812211	1.1576	1043.68	0.988064	2.09097	7.236	194.396	-0.474845
0.27215	-13.9774	-0.570143	3.06563e+06	0.0378139	0.713469	1.10864	0.987141	1050	0.0377412	0.913671	1.20392	1038.31	0.98902	2.07164	7.8267	194.396	-0.572429
0.3027	-13.9209	-0.582545	3.06563e+06	0.037661	0.710584	1.10715	0.987141	1050	0.0375831	0.926206	1.2094	1037.58	0.989166	2.0694	7.89812	194.396	-0.584943
0.21565	-14.0263	-0.451447	3.06563e+06	0.0379461	0.715964	1.10994	0.987141	1050	0.037919	0.788342	1.14614	1045.1	0.987825	2.09583	7.09352	194.396	-0.452868
0.2899	-13.8653	-0.564398	3.06563e+06	0.0375106	0.707747	1.10567	0.987141	1050	0.037437	0.907855	1.20136	1038.24	0.989061	2.07269	7.79345	194.396	-0.566656
0.23935	-13.9063	-0.435043	3.06563e+06	0.0376214	0.709838	1.10676	0.987141	1050	0.0375978	0.770149	1.13726	1045.82	0.98774	2.09964	6.98396	194.396	-0.436373
0.2637	-14.0258	-0.627783	3.06563e+06	0.0379447	0.715937	1.10992	0.987141	1050	0.037856	0.971081	1.22862	1035.98	0.989433	2.0616	8.15122	194.396	-0.630551
0.24795	-14.0106	-0.527775	3.06563e+06	0.0379038	0.715166	1.10952	0.987141	1050	0.0378462	0.87012	1.18448	1040.5	0.988622	2.07968	7.57597	194.396	-0.529725
0.2767	-13.7127	-0.335628	3.06563e+06	0.0370977	0.699957	1.1016	0.987141	1050	0.0371197	0.653961	1.07692	1053.76	0.986537	2.12593	6.26259	194.396	-0.336428
0.29165	-13.9562	-0.479877	3.06563e+06	0.0377564	0.712385	1.10808	0.987141	1050	0.0377153	0.819351	1.16098	1043.03	0.988196	2.08953	7.27834	194.396	-0.481493
0.30045	-14.1083	-0.569198	3.06563e+06	0.0381679	0.720148	1.11209	0.987141	1050	0.0380988	0.912691	1.20349	1038.74	0.988909	2.07182	7.8211	194.396	-0.571455
0.30545	-13.8202	-0.533106	3.06563e+06	0.0373885	0.705444	1.10447	0.987141	1050	0.037324	0.875695	1.187	1039.62	0.988826	2.07863	7.6083	194.396	-0.535124
0.29575	-14.0806	-0.547238	3.06563e+06	0.038093	0.718736	1.11137	0.987141	1050	0.0380306	0.890263	1.19355	1039.72	0.988741	2.07591	7.69245	194.396	-0.549326
0.25165	-14.0751	-0.484792	3.06563e+06	0.0380781	0.718455	1.11122	0.987141	1050	0.0380386	0.824628	1.16346	1043.13	0.988146	2.08848	7.30955	194.396	-0.486427
0.2622	-14.1971	-0.66548	3.06563e+06	0.0384081	0.724681	1.11442	0.987141	1050	0.0383129	1.00757	1.24382	1035.02	0.989573	2.05551	8.35417	194.396	-0.668556
0.2652	-14.0568	-0.500816	3.06563e+06	0.0380288	0.717524	1.11074	0.987141	1050	0.0379824	0.841749	1.17146	1042.12	0.988325	2.08512	7.41038	194.396	-0.502564
0.26195	-13.8311	-0.347592	3.06563e+06	0.037418	0.706	1.10476	0.987141	1050	0.0374372	0.668538	1.08487	1053	0.986613	2.12242	6.3553	194.396	-0.348443
0.26725	-14.1066	-0.724899	3.06563e+06	0.0381632	0.720061	1.11205	0.987141	1050	0.0380514	1.06369	1.2665	1032.77	0.990022	2.04657	8.66157	194.396	-0.728582
0.26905	-14.0407	-0.461097	3.06563e+06	0.0379851	0.716701	1.11032	0.987141	1050	0.0379543	0.798939	1.15126	1044.51	0.987921	2.09366	7.15695	194.396	-0.462578
0.30555	-14.072	-0.575243	3.06563e+06	0.0380698	0.718299	1.11114	0.987141	1050	0.0379979	0.918817	1.20617	1038.36	0.988988	2.07072	7.85607	194.396	-0.577555
0.3171	-14.0042	-0.56674	3.06563e+06	0.0378863	0.714836	1.10935	0.987141	1050	0.0378154	0.910213	1.2024	1038.55	0.98897	2.07227	7.80694	194.396	-0.568994
0.27465	-14.0646	-0.444446	3.06563e+06	0.0380498	0.717921	1.11095	0.987141	1050	0.038027	0.780598	1.14238	1045.72	0.987711	2.09744	7.04699	194.396	-0.445819
0.29575	-14.183	-0.413639	3.06563e+06	0.0383701	0.723964	1.11405	0.987141	1050	0.038366	0.745989	1.12524	1048.43	0.987227	2.10481	6.83713	194.396	-0.414817
0.2617	-14.1246	-0.476641	3.06563e+06	0.0382122	0.720984	1.11252	0.987141	1050	0.0381774	0.815835	1.15931	1043.8	0.988018	2.09024	7.2575	194.396	-0.478215
0.27385	-14.0922	-0.509481	3.06563e+06	0.0381244	0.719328	1.11167	0.987141	1050	0.0380758	0.85092	1.1757	1041.75	0.988381	2.08334	7.46411	194.396	-0.511287
0.2625	-14.0835	-0.548147	3.06563e+06	0.0381008	0.718884	1.11144	0.987141	1050	0.0380382	0.891198	1.19397	1039.68	0.988747	2.07574	7.69783	194.396	-0.550242
0.26095	-14.1616	-0.716797	3.06563e+06	0.0383123	0.722873	1.11349	0.987141	1050	0.0382034	1.05613	1.26349	1033.17	0.989933	2.04775	8.62047	194.396	-0.720383
0.30235	-14.0904	-0.623603	3.06563e+06	0.0381196	0.719238	1.11162	0.987141	1050	0.0380335	0.96697	1.22689	1036.33	0.989353	2.0623	8.1282	194.396	-0.626321
0.26655	-14.0602	-0.457303	3.06563e+06	0.0380378	0.717694	1.11083	0.987141	1050	0.0380092	0.79478	1.14925	1044.82	0.987862	2.09451	7.13209	194.396	-0.458758
0.2696	-13.9764	-0.572714	3.06563e+06	0.0378112	0.713419	1.10862	0.987141	1050	0.0377377	0.916275	1.20506	1038.19	0.989042	2.07117	7.84157	194.396	-0.57502
0.2659	-13.9176	-0.478761	3.06563e+06	0.037652	0.710415	1.10706	0.987141	1050	0.0376102	0.818152	1.16041	1042.97	0.988217	2.08977	7.27123	194.396	-0.480374
0.2613	-14.2101	-0.543147	3.06563e+06	0.0384435	0.725349	1.11476	0.987141	1050	0.0383859	0.886029	1.19165	1040.32	0.9886	2.0767	7.66804	194.396	-0.545185
0.26735	-14.0843	-0.513473	3.06563e+06	0.0381031	0.718927	1.11146	0.987141	1050	0.0380528	0.855129	1.17764	1041.5	0.988426	2.08253	7.4887	194.396	-0.515308
0.3216	-14.0613	-0.498713	3.06563e+06	0.0380409	0.717753	1.11086	0.987141	1050	0.0379955	0.839514	1.17042	1042.26	0.9883	2.08555	7.39726	194.396	-0.500446
0.2725	-14.1103	-0.63694	3.06563e+06	0.0381732	0.72025	1.11215	0.987141	1050	0.0380839	0.980009	1.23238	1035.86	0.989436	2.06009	8.2011	194.396	-0.639774
0.27335	-14.2597	-0.536257	3.06563e+06	0.0385776	0.72788	1.11606	0.987141	1050	0.0385239	0.878898	1.18845	1040.83	0.988497	2.07803	7.62684	194.396	-0.538235
0.26325	-14.1593	-0.305268	3.06563e+06	0.038306	0.722754	1.11343	0.987141	1050	0.0383671	0.616056	1.0557	1059.28	0.985546	2.13534	6.01819	194.396	-0.305907
0.2655	-14.2746	-0.535979	3.06563e+06	0.038618	0.728641	1.11645	0.987141	1050	0.0385647	0.878608	1.18832	1040.89	0.988482	2.07808	7.62516	194.396	-0.537953
0.2721	-14.303	-0.571168	3.06563e+06	0.0386946	0.730086	1.11719	0.987141	1050	0.0386299	0.914656	1.20435	1039.23	0.988771	2.07147	7.83233	194.396	-0.573409
0.28	-14.0153	-0.301127	3.06563e+06	0.0379164	0.715403	1.10965	0.987141	1050	0.0379743	0.610796	1.05269	1059.17	0.985615	2.13668	5.98388	194.396	-0.301756
0.2673	-14.3202	-0.484002	3.06563e+06	0.0387412	0.730967	1.11763	0.987141	1050	0.0387095	0.823749	1.16305	1043.99	0.98793	2.08866	7.30436	194.396	-0.485603
0.26795	-14.3131	-0.513168	3.06563e+06	0.0387219	0.730602	1.11745	0.987141	1050	0.0386782	0.854777	1.17747	1042.25	0.988234	2.0826	7.48665	194.396	-0.514972
0.31445	-14.301	-0.424192	3.06563e+06	0.0386892	0.729985	1.11713	0.987141	1050	0.0386839	0.75793	1.13121	1048.04	0.987255	2.10223	6.9099	194.396	-0.425421
0.33885	-14.3632	-0.601251	3.06563e+06	0.0388576	0.733162	1.11875	0.987141	1050	0.0387848	0.944837	1.21745	1038.05	0.988972	2.06612	8.00369	194.396	-0.603726
0.32975	-14.5877	-0.525854	3.06563e+06	0.0394648	0.74462	1.12455	0.987141	1050	0.0394245	0.868035	1.18353	1042.42	0.988131	2.08007	7.56386	194.396	-0.527712
0.27275	-14.0265	-0.420783	3.06563e+06	0.0379467	0.715975	1.10994	0.987141	1050	0.0379336	0.754107	1.12931	1047.3	0.987459	2.10305	6.88664	194.396	-0.422016
0.30555	-14.271	-0.527084	3.06563e+06	0.0386081	0.728455	1.11635	0.987141	1050	0.0385581	0.869362	1.18413	1041.35	0.988402	2.07982	7.57157	194.396	-0.528993
0.32125	-14.2154	-0.403655	3.06563e+06	0.0384577	0.725617	1.1149	0.987141	1050	0.0384598	0.734576	1.11947	1049.36	0.987066	2.1073	6.76722	194.396	-0.404773
0.3138	-14.1787	-0.440616	3.06563e+06	0.0383585	0.723746	1.11394	0.987141	1050	0.0383412	0.776332	1.14029	1046.39	0.987565	2.09833	7.0213	194.396	-0.441955
0.3318	-14.3426	-0.600749	3.06563e+06	0.0388018	0.73211	1.11822	0.987141	1050	0.0387287	0.944341	1.21724	1038.01	0.988984	2.0662	8.00089	194.396	-0.603224
0.36565	-14.2616	-0.533716	3.06563e+06	0.0385827	0.727976	1.11611	0.987141	1050	0.0385299	0.876263	1.18726	1040.97	0.988472	2.07852	7.61159	194.396	-0.535675
0.34515	-14.2947	-0.463408	3.06563e+06	0.0386722	0.729664	1.11697	0.987141	1050	0.0386484	0.801436	1.15245	1045.22	0.987727	2.09315	7.17186	194.396	-0.464877
0.3475	-14.28	-0.48187	3.06563e+06	0.0386325	0.728916	1.11659	0.987141	1050	0.0386004	0.821459	1.16197	1043.99	0.987941	2.08911	7.29081	194.396	-0.483462
0.3669	-14.4776	-0.548454	3.06563e+06	0.0391671	0.739003	1.12171	0.987141	1050	0.0391151	0.891454	1.19408	1040.88	0.988433	2.07569	7.6993	194.396	-0.550493
0.34015	-14.3314	-0.450766	3.06563e+06	0.0387716	0.73154	1.11793	0.987141	1050	0.0387547	0.787557	1.14576	1046.21	0.98755	2.096	7.08881	194.396	-0.452152
0.341	-14.3671	-0.458288	3.06563e+06	0.0388682	0.733363	1.11885	0.987141	1050	0.0388491	0.795826	1.14976	1045.82	0.987606	2.09429	7.13834	194.396	-0.459718
0.3628	-14.4909	-0.554146	3.06563e+06	0.0392031	0.739681	1.12206	0.987141	1050	0.0391494	0.897291	1.19668	1040.63	0.988473	2.07462	7.73288	194.396	-0.556226
0.35915	-14.5331	-0.525979	3.06563e+06	0.0393172	0.741835	1.12315	0.987141	1050	0.0392752	0.868173	1.18359	1042.24	0.988177	2.08004	7.56466	194.396	-0.527845
0.3728	-14.385	-0.572276	3.06563e+06	0.0389165	0.734274	1.11932	0.987141	1050	0.0388537	0.915765	1.20484	1039.43	0.988716	2.07127	7.83865	194.396	-0.574512
0.4218	-14.3398	-0.487055	3.06563e+06	0.0387942	0.731967	1.11814	0.987141	1050	0.0387618	0.827025	1.16459	1043.87	0.987946	2.08801	7.32371	194.396	-0.488675
0.4179	-14.3584	-0.535545	3.06563e+06	0.0388446	0.732917	1.11863	0.987141	1050	0.0387939	0.878146	1.18811	1041.18	0.98841	2.07817	7.62248	194.396	-0.537504
0.36065	-14.4357	-0.463922	3.06563e+06	0.0390537	0.736863	1.12063	0.987141	1050	0.0390343	0.801982	1.15272	1045.67	0.987611	2.09304	7.17511	194.396	-0.46538
0.46115	-14.5433	-0.699384	3.06563e+06	0.0393447	0.742353	1.12341	0.987141	1050	0.0392482	1.03972	1.25691	1034.75	0.989548	2.05033	8.5309	194.396	-0.702704
0.4344	-14.4249	-0.492149	3.06563e+06	0.0390245	0.736311	1.12035	0.987141	1050	0.0389926	0.832469	1.16714	1043.84	0.987927	2.08693	7.35581	194.396	-0.493793
0.3733	-14.5194	-0.520831	3.06563e+06	0.0392802	0.741135	1.12279	0.987141	1050	0.0392397	0.862794	1.18114	1042.48	0.988138	2.08107	7.53338	194.396	-0.522662
0.36265	-14.653	-0.630474	3.06563e+06	0.0396417	0.747956	1.12623	0.987141	1050	0.0395672	0.973596	1.22968	1037.64	0.988978	2.06117	8.16528	194.396	-0.633144
0.41985	-14.4586	-0.526556	3.06563e+06	0.0391156	0.738031	1.12122	0.987141	1050	0.0390712	0.868785	1.18387	1041.97	0.988244	2.07993	7.56822	194.396	-0.528436
0.48675	-14.5872	-0.532827	3.06563e+06	0.0394635	0.744594	1.12454	0.987141	1050	0.0394204	0.875294	1.18682	1042.04	0.988199	2.0787	7.60597	194.396	-0.534735
0.38145	-14.6719	-0.485696	3.06563e+06	0.0396927	0.748918	1.12671	0.987141	1050	0.0396714	0.825527	1.16389	1045.06	0.98765	2.0883	7.31487	194.396	-0.48727
0.4811	-14.5705	-0.551315	3.06563e+06	0.0394185	0.743745	1.12411	0.987141	1050	0.0393681	0.894378	1.19538	1041.02	0.988384	2.07516	7.71613	194.396	-0.553361
0.4621	-14.6162	-0.489987	3.06563e+06	0.039542	0.746075	1.12528	0.987141	1050	0.039517	0.830134	1.16605	1044.6	0.987743	2.08739	7.34205	194.396	-0.491595
0.3956	-14.621	-0.499278	3.06563e+06	0.0395551	0.746322	1.12541	0.987141	1050	0.0395264	0.840043	1.17067	1044.05	0.987837	2.08545	7.40037	194.396	-0.500947
0.38135	-14.6265	-0.559224	3.06563e+06	0.0395698	0.746601	1.12555	0.987141	1050	0.0395182	0.902462	1.19897	1040.79	0.98841	2.07368	7.76255	194.396	-0.561322
0.3959	-14.709	-0.424261	3.06563e+06	0.0397932	0.750814	1.12766	0.987141	1050	0.0398024	0.757969	1.13123	1049.51	0.98689	2.10223	6.91013	194.396	-0.425456
0.49835	-14.5432	-0.506502	3.06563e+06	0.0393445	0.742349	1.12341	0.987141	1050	0.0393104	0.847713	1.17422	1043.37	0.987976	2.08396	7.44534	194.396	-0.50823
0.36615	-14.6736	-0.525533	3.06563e+06	0.0396974	0.749007	1.12675	0.987141	1050	0.0396597	0.867689	1.18337	1042.71	0.988058	2.08014	7.56185	194.396	-0.527377
0.4171	-14.5641	-0.545143	3.06563e+06	0.039401	0.743415	1.12394	0.987141	1050	0.0393527	0.888035	1.19255	1041.31	0.988333	2.07633	7.6796	194.396	-0.547145

## Sheet: HxWxL=3x3x100 | d=1.3
Transit time of particle Dt (sec)	Signal at antinode Df_anti (Hz)	Signal Df_max near node (Hz)	baseline frequency f (Hz)	nominal buoyant mass m_bnom (pg)	reference volume V_ref (um3)	reference diameter d_ref (um)	nominal alpha_m	nominal density rho_nom (kg/m3)	measured buoyant mass m_b (pg)	measured volume V_meas (um3)	measured diameter d_meas (um)	measured density rho_p (kg/m3)	measured alpha_m	measured alpha_v	measured beta(R/H)^2	measured beta	Signal at node Df_node(Hz)
0.20365	-25.6461	-1.50702	3.06576e+06	0.069578	1.31279	1.35852	0.984317	1050	0.06939	1.68839	1.47738	1038.1	0.986963	1.97128	11.7865	194.404	-1.51581
0.14735	-25.3572	-1.31318	3.06576e+06	0.0687943	1.298	1.3534	0.984317	1050	0.0686577	1.54728	1.43502	1041.37	0.986254	1.98528	11.1203	194.404	-1.31991
0.14695	-25.3824	-1.29205	3.06576e+06	0.0688625	1.29929	1.35385	0.984317	1050	0.068734	1.53144	1.4301	1041.88	0.986136	1.98694	11.0443	194.404	-1.29855
0.1587	-25.612	-1.3113	3.06576e+06	0.0694854	1.31105	1.35792	0.984317	1050	0.0693579	1.54582	1.43456	1041.87	0.986105	1.98543	11.1133	194.404	-1.31793
0.209	-25.8029	-1.52207	3.06576e+06	0.0700033	1.32082	1.36128	0.984317	1050	0.0698155	1.69903	1.48047	1038.09	0.986944	1.97027	11.836	194.404	-1.53099
0.1514	-25.9689	-1.34025	3.06577e+06	0.0704538	1.32932	1.3642	0.984317	1050	0.0703282	1.5673	1.44118	1041.87	0.986053	1.98321	11.216	194.404	-1.34709
0.16705	-25.4647	-1.34694	3.06577e+06	0.0690858	1.30351	1.35531	0.984317	1050	0.0689414	1.57236	1.44273	1040.85	0.986357	1.98269	11.2401	194.404	-1.35399
0.1568	-25.6372	-1.39827	3.06577e+06	0.0695537	1.31233	1.35836	0.984317	1050	0.0693982	1.61006	1.45417	1040.1	0.986502	1.97888	11.4191	194.404	-1.40582
0.14685	-25.694	-1.25944	3.06577e+06	0.0697079	1.31524	1.35936	0.984317	1050	0.0696018	1.50677	1.42238	1043.19	0.985797	1.98956	10.9254	194.404	-1.26554
0.16405	-25.793	-1.35979	3.06577e+06	0.0699765	1.32031	1.36111	0.984317	1050	0.0698385	1.58179	1.44561	1041.15	0.986241	1.98173	11.285	194.404	-1.36689
0.17345	-26.0844	-1.45925	3.06577e+06	0.0707669	1.33523	1.36621	0.984317	1050	0.0706062	1.65414	1.46732	1039.68	0.986537	1.97455	11.6266	194.404	-1.46735
0.15345	-25.6296	-1.30307	3.06577e+06	0.0695331	1.31195	1.35823	0.984317	1050	0.069409	1.53966	1.43266	1042.08	0.986055	1.98607	11.0838	194.404	-1.30962
0.1912	-25.9575	-1.44951	3.06576e+06	0.0704228	1.32873	1.364	0.984317	1050	0.0702611	1.64716	1.46525	1039.66	0.98656	1.97523	11.5939	194.404	-1.45754
0.1494	-25.7881	-1.33284	3.06576e+06	0.0699633	1.32006	1.36102	0.984317	1050	0.0698342	1.56184	1.4395	1041.71	0.986115	1.98377	11.1899	194.404	-1.33965
0.19365	-25.6804	-1.37206	3.06576e+06	0.0696711	1.31455	1.35913	0.984317	1050	0.0695254	1.59084	1.44836	1040.7	0.986359	1.98081	11.328	194.404	-1.37931
0.16405	-25.3897	-1.30461	3.06576e+06	0.0688825	1.29967	1.35398	0.984317	1050	0.0687499	1.54086	1.43303	1041.62	0.986194	1.98595	11.0895	194.404	-1.31124
0.1606	-25.5541	-1.36134	3.06576e+06	0.0693284	1.30808	1.35689	0.984317	1050	0.0691821	1.58298	1.44597	1040.7	0.986377	1.98161	11.2907	194.404	-1.36852
0.16675	-25.8371	-1.41966	3.06576e+06	0.0700962	1.32257	1.36188	0.984317	1050	0.0699402	1.62559	1.45883	1040.02	0.986492	1.97734	11.4924	194.404	-1.42739
0.1511	-25.4368	-1.26899	3.06576e+06	0.0690102	1.30208	1.35481	0.984317	1050	0.0688916	1.51405	1.42467	1042.5	0.985989	1.98878	10.9605	194.404	-1.27525
0.1958	-25.8349	-1.38529	3.06576e+06	0.0700904	1.32246	1.36185	0.984317	1050	0.0699453	1.60052	1.45129	1040.7	0.986338	1.97984	11.3739	194.404	-1.39265
0.2106	-25.6861	-1.3846	3.06576e+06	0.0696868	1.31484	1.35923	0.984317	1050	0.0695371	1.60005	1.45115	1040.46	0.986414	1.97989	11.3717	194.404	-1.392
0.20865	-25.9283	-1.44505	3.06576e+06	0.0703438	1.32724	1.36349	0.984317	1050	0.0701826	1.64395	1.4643	1039.69	0.986556	1.97555	11.5788	194.404	-1.45304
0.15205	-25.5839	-1.25256	3.06576e+06	0.0694093	1.30961	1.35742	0.984317	1050	0.0693019	1.50156	1.42074	1043.15	0.985822	1.99012	10.9001	194.404	-1.25861
0.19085	-25.7415	-1.45059	3.06576e+06	0.0698368	1.31768	1.3602	0.984317	1050	0.0696682	1.64799	1.4655	1039.27	0.986678	1.97515	11.5977	194.404	-1.4587
0.15635	-25.9182	-1.34386	3.06576e+06	0.0703163	1.32672	1.36331	0.984317	1050	0.0701878	1.56999	1.442	1041.71	0.986098	1.98293	11.2288	194.404	-1.35075
0.1519	-25.8411	-1.26189	3.06576e+06	0.0701073	1.32278	1.36196	0.984317	1050	0.0700054	1.5086	1.42296	1043.4	0.985728	1.98937	10.9342	194.404	-1.26798
0.15305	-25.946	-1.36755	3.06576e+06	0.0703917	1.32815	1.36379	0.984317	1050	0.0702561	1.58747	1.44734	1041.26	0.986196	1.98115	11.312	194.404	-1.37469
0.1567	-25.8627	-1.30155	3.06576e+06	0.0701658	1.32388	1.36233	0.984317	1050	0.0700503	1.53848	1.43229	1042.53	0.98592	1.9862	11.0781	194.404	-1.30803
0.1741	-25.9977	-1.36231	3.06576e+06	0.070532	1.33079	1.3647	0.984317	1050	0.0703999	1.5836	1.44616	1041.46	0.986143	1.98155	11.2936	194.404	-1.36937
0.1981	-26.0967	-1.46488	3.06576e+06	0.0708007	1.33586	1.36643	0.984317	1050	0.0706386	1.65818	1.46851	1039.6	0.986555	1.97417	11.6455	194.404	-1.47303
0.2203	-26.2004	-1.47768	3.06576e+06	0.071082	1.34117	1.36824	0.984317	1050	0.0709192	1.66734	1.47121	1039.53	0.986556	1.97329	11.6883	194.404	-1.48595
0.17115	-26.1646	-1.40715	3.06576e+06	0.0709848	1.33934	1.36761	0.984317	1050	0.0708432	1.61642	1.45608	1040.83	0.986263	1.97825	11.4491	194.404	-1.41465
0.19095	-26.2006	-1.39243	3.06576e+06	0.0710824	1.34118	1.36824	0.984317	1050	0.0709469	1.60568	1.45285	1041.19	0.986176	1.97932	11.3983	194.404	-1.39976
0.1547	-25.8229	-1.27468	3.06576e+06	0.0700577	1.32184	1.36163	0.984317	1050	0.0699505	1.51828	1.42599	1043.07	0.985804	1.98833	10.9809	194.404	-1.2809
0.1714	-25.8595	-1.36712	3.06576e+06	0.0701571	1.32372	1.36228	0.984317	1050	0.0700188	1.58717	1.44724	1041.12	0.98624	1.98118	11.3106	194.404	-1.37427
0.2016	-25.9628	-1.42736	3.06576e+06	0.0704373	1.32901	1.36409	0.984317	1050	0.0702827	1.63115	1.46049	1040.09	0.98646	1.9768	11.5186	194.404	-1.43514
0.1543	-25.9114	-1.28958	3.06576e+06	0.070298	1.32638	1.36319	0.984317	1050	0.0701884	1.52948	1.42949	1042.89	0.985832	1.98715	11.0348	194.404	-1.29592
0.2293	-26.2241	-1.50058	3.06576e+06	0.0711462	1.34238	1.36865	0.984317	1050	0.0709771	1.68367	1.476	1039.16	0.98664	1.97173	11.7645	194.404	-1.5091
0.19095	-25.6265	-1.33743	3.06576e+06	0.069525	1.31179	1.35817	0.984317	1050	0.0693891	1.56528	1.44056	1041.33	0.986224	1.98342	11.2063	194.404	-1.34433
0.17865	-26.1561	-1.43165	3.06576e+06	0.0709618	1.3389	1.36747	0.984317	1050	0.0708119	1.63422	1.4614	1040.33	0.986378	1.9765	11.533	194.404	-1.43942
0.18435	-25.9776	-1.3331	3.06575e+06	0.0704776	1.32977	1.36435	0.984317	1050	0.0703548	1.56199	1.43955	1042.04	0.986013	1.98376	11.1906	194.404	-1.33986
0.1643	-26.0836	-1.27533	3.06575e+06	0.070765	1.33519	1.3662	0.984317	1050	0.0706668	1.51871	1.42613	1043.53	0.985664	1.98829	10.983	194.404	-1.28148
0.2152	-26.5715	-1.37604	3.06575e+06	0.0720888	1.36017	1.37467	0.984317	1050	0.0719714	1.59359	1.44919	1042.16	0.985901	1.98054	11.3411	194.404	-1.38309
0.22315	-26.2403	-1.39183	3.06575e+06	0.0711901	1.34321	1.36893	0.984317	1050	0.0710561	1.60522	1.45271	1041.27	0.986152	1.97937	11.3962	194.404	-1.39914
0.16615	-26.3534	-1.30826	3.06575e+06	0.0714971	1.349	1.3709	0.984317	1050	0.0713963	1.54341	1.43382	1043.26	0.985685	1.98569	11.1017	194.404	-1.31468
0.1652	-26.3558	-1.32814	3.06575e+06	0.0715035	1.34912	1.37094	0.984317	1050	0.0713955	1.55824	1.4384	1042.82	0.985784	1.98415	11.1727	194.404	-1.33476
0.1585	-26.174	-1.21067	3.06575e+06	0.0710104	1.33982	1.36778	0.984317	1050	0.0709408	1.46944	1.41054	1045.28	0.985262	1.99362	10.7441	194.404	-1.21619
0.159	-26.4254	-1.32167	3.06575e+06	0.0716924	1.35269	1.37214	0.984317	1050	0.0715893	1.5534	1.43691	1043.09	0.985713	1.98465	11.1496	194.404	-1.3282
0.221	-26.6868	-1.45728	3.06575e+06	0.0724016	1.36607	1.37665	0.984317	1050	0.0722607	1.65259	1.46686	1040.73	0.986215	1.97471	11.6193	194.404	-1.46516
0.15995	-26.4672	-1.29879	3.06575e+06	0.0718058	1.35483	1.37287	0.984317	1050	0.0717127	1.5363	1.43161	1043.68	0.985574	1.98643	11.0676	194.404	-1.30509
0.21555	-26.9508	-1.45071	3.06575e+06	0.0731179	1.37958	1.38118	0.984317	1050	0.072988	1.64781	1.46544	1041.29	0.986048	1.97517	11.5969	194.404	-1.45844
0.16085	-26.5213	-1.26086	3.06575e+06	0.0719525	1.35759	1.3738	0.984317	1050	0.071876	1.5077	1.42267	1044.67	0.985344	1.98946	10.9298	194.404	-1.26678
0.2113	-26.5193	-1.41338	3.06575e+06	0.071947	1.35749	1.37377	0.984317	1050	0.0718151	1.62088	1.45742	1041.31	0.986104	1.97781	11.4702	194.404	-1.42084
0.1893	-26.5208	-1.40024	3.06575e+06	0.0719512	1.35757	1.37379	0.984317	1050	0.0718237	1.61131	1.45454	1041.57	0.986043	1.97876	11.425	194.404	-1.40755
0.1699	-26.5576	-1.31434	3.06575e+06	0.072051	1.35945	1.37443	0.984317	1050	0.0719553	1.54791	1.43521	1043.49	0.985604	1.98522	11.1233	194.404	-1.32077
0.21945	-26.5724	-1.36022	3.06575e+06	0.0720913	1.36021	1.37468	0.984317	1050	0.0719795	1.58194	1.44565	1042.5	0.985825	1.98172	11.2857	194.404	-1.3671
0.21645	-26.773	-1.42426	3.06575e+06	0.0726355	1.37048	1.37813	0.984317	1050	0.0725084	1.62873	1.45977	1041.52	0.986021	1.97704	11.5072	194.404	-1.43176
0.21045	-26.6335	-1.40115	3.06575e+06	0.072257	1.36334	1.37574	0.984317	1050	0.072133	1.61195	1.45474	1041.75	0.985987	1.9787	11.428	194.404	-1.40844
0.21035	-26.8072	-1.37172	3.06576e+06	0.0727283	1.37223	1.37872	0.984317	1050	0.0726207	1.59036	1.44821	1042.66	0.985755	1.98086	11.3258	194.404	-1.37866
0.16905	-26.5816	-1.28026	3.06576e+06	0.0721161	1.36068	1.37484	0.984317	1050	0.0720343	1.52235	1.42727	1044.32	0.985414	1.9879	11.0005	194.404	-1.28635
0.1941	-26.6061	-1.33025	3.06576e+06	0.0721826	1.36194	1.37526	0.984317	1050	0.0720828	1.55976	1.43886	1043.21	0.985658	1.98399	11.18	194.404	-1.33682
0.181	-27.1899	-1.42526	3.06576e+06	0.0737665	1.39182	1.38525	0.984317	1050	0.0736535	1.62937	1.45996	1042.2	0.985806	1.97697	11.5102	194.404	-1.43265
0.1785	-26.9513	-1.29113	3.06576e+06	0.0731191	1.37961	1.38119	0.984317	1050	0.073047	1.53046	1.4298	1044.73	0.985268	1.98704	11.0395	194.404	-1.29724
0.19695	-27.0424	-1.44096	3.06576e+06	0.0733662	1.38427	1.38274	0.984317	1050	0.0732427	1.64076	1.46335	1041.64	0.985956	1.97586	11.5638	194.404	-1.44856
0.1671	-27.1729	-1.24789	3.06576e+06	0.0737202	1.39095	1.38496	0.984317	1050	0.0736743	1.49774	1.41953	1046.19	0.984909	1.99054	10.8816	194.404	-1.25353
0.1757	-26.9154	-1.25711	3.06576e+06	0.0730217	1.37777	1.38057	0.984317	1050	0.0729618	1.50479	1.42176	1045.49	0.985104	1.98977	10.9157	194.404	-1.2629
0.17105	-27.2631	-1.2752	3.06576e+06	0.0739651	1.39557	1.38649	0.984317	1050	0.0739115	1.51841	1.42604	1045.68	0.98501	1.98832	10.9815	194.404	-1.28108
0.1842	-26.6984	-1.27951	3.06576e+06	0.072433	1.36666	1.37685	0.984317	1050	0.0723558	1.52176	1.42708	1044.55	0.985346	1.98796	10.9976	194.404	-1.28556
0.17125	-27.2309	-1.19262	3.06576e+06	0.0738778	1.39392	1.38595	0.984317	1050	0.0738582	1.45536	1.40602	1047.75	0.984556	1.99518	10.6754	194.404	-1.19777
0.1756	-27.2987	-1.2494	3.06576e+06	0.0740617	1.39739	1.3871	0.984317	1050	0.0740202	1.49887	1.41989	1046.38	0.984847	1.99041	10.8871	194.404	-1.25504
0.1764	-27.365	-1.23255	3.06576e+06	0.0742414	1.40078	1.38822	0.984317	1050	0.0742099	1.48601	1.41582	1046.94	0.984714	1.99181	10.8248	194.404	-1.23802
0.1751	-27.3704	-1.16954	3.06576e+06	0.0742562	1.40106	1.38831	0.984317	1050	0.0742531	1.43742	1.40022	1048.66	0.984336	1.99719	10.5875	194.404	-1.17445
0.17755	-27.4621	-1.31985	3.06576e+06	0.074505	1.40575	1.38986	0.984317	1050	0.0744412	1.55186	1.43643	1044.97	0.98514	1.98481	11.1422	194.404	-1.32611
0.2163	-27.5267	-1.41602	3.06576e+06	0.07468	1.40906	1.39095	0.984317	1050	0.0745823	1.6226	1.45793	1042.96	0.985585	1.97764	11.4783	194.404	-1.42323
0.1766	-27.6549	-1.22909	3.06576e+06	0.075028	1.41562	1.3931	0.984317	1050	0.0750101	1.48333	1.41497	1047.57	0.984531	1.9921	10.8117	194.404	-1.23447
0.18285	-27.5116	-1.28585	3.06576e+06	0.0746391	1.40828	1.39069	0.984317	1050	0.0745909	1.52639	1.42853	1045.87	0.984931	1.98747	11.02	194.404	-1.29177
0.1772	-27.8124	-1.28491	3.06576e+06	0.0754552	1.42368	1.39574	0.984317	1050	0.0754197	1.52564	1.42829	1046.43	0.98476	1.98755	11.0164	194.404	-1.29076
0.19305	-24.91	-1.40089	3.06575e+06	0.0675812	1.27512	1.3454	0.984317	1050	0.067403	1.61214	1.45479	1038.81	0.986899	1.97868	11.4289	194.403	-1.4087
0.16255	-24.7805	-1.40969	3.06575e+06	0.06723	1.26849	1.34306	0.984317	1050	0.0670454	1.61858	1.45673	1038.42	0.987005	1.97804	11.4593	194.403	-1.41764
0.18435	-25.3302	-1.38859	3.06575e+06	0.0687212	1.29663	1.35292	0.984317	1050	0.0685592	1.60305	1.45205	1039.77	0.986621	1.97959	11.3859	194.403	-1.39613
0.14595	-25.1466	-1.26883	3.06575e+06	0.0682231	1.28723	1.34964	0.984317	1050	0.0680949	1.51399	1.42465	1041.98	0.986149	1.98879	10.9601	194.403	-1.27516
0.1485	-24.9335	-1.32721	3.06575e+06	0.067645	1.27632	1.34582	0.984317	1050	0.0674903	1.55783	1.43827	1040.32	0.986551	1.98419	11.1707	194.403	-1.33421
0.14545	-24.8422	-1.24203	3.06575e+06	0.0673973	1.27165	1.34418	0.984317	1050	0.0672684	1.49369	1.41825	1042.04	0.986182	1.99097	10.862	194.403	-1.24816
0.1904	-25.2177	-1.30747	3.06575e+06	0.068416	1.29087	1.35091	0.984317	1050	0.0682769	1.54304	1.4337	1041.25	0.986302	1.98572	11.0999	194.403	-1.31418
0.1867	-24.9151	-1.3943	3.06575e+06	0.0675949	1.27538	1.34549	0.984317	1050	0.0674188	1.60732	1.45334	1038.94	0.986867	1.97916	11.4061	194.403	-1.40204
0.174	-25.0166	-1.38817	3.06575e+06	0.0678703	1.28057	1.34731	0.984317	1050	0.067699	1.60281	1.45198	1039.24	0.986786	1.97961	11.3848	194.403	-1.3958
0.15965	-25.0942	-1.31114	3.06575e+06	0.0680811	1.28455	1.34871	0.984317	1050	0.0679367	1.54581	1.43456	1040.95	0.986387	1.98544	11.1132	194.403	-1.31792
0.17855	-24.9978	-1.48149	3.06575e+06	0.0678195	1.27961	1.34698	0.984317	1050	0.0676205	1.67035	1.4721	1037.48	0.987192	1.973	11.7024	194.403	-1.49021
0.1738	-25.2097	-1.37732	3.06575e+06	0.0683942	1.29046	1.35077	0.984317	1050	0.0682321	1.59482	1.44956	1039.78	0.986634	1.98041	11.3469	194.403	-1.38478
0.18185	-25.6375	-1.45792	3.06575e+06	0.069555	1.31236	1.35837	0.984317	1050	0.0693811	1.65329	1.46707	1038.97	0.986763	1.97464	11.6226	194.403	-1.46615
0.19205	-25.6416	-1.46457	3.06575e+06	0.0695661	1.31257	1.35844	0.984317	1050	0.0693903	1.65807	1.46848	1038.85	0.986789	1.97418	11.6449	194.403	-1.47287
0.1865	-25.3094	-1.39832	3.06575e+06	0.0686649	1.29556	1.35255	0.984317	1050	0.0684993	1.61017	1.4542	1039.54	0.986676	1.97888	11.4196	194.403	-1.40598
0.15335	-25.0712	-1.25206	3.06575e+06	0.0680186	1.28337	1.34829	0.984317	1050	0.0678938	1.50128	1.42065	1042.22	0.986105	1.99016	10.8987	194.403	-1.25823
0.1455	-25.1629	-1.28308	3.06575e+06	0.0682675	1.28807	1.34994	0.984317	1050	0.0681348	1.52474	1.42801	1041.69	0.986212	1.98765	11.012	194.403	-1.28955
0.14585	-25.2522	-1.23291	3.06575e+06	0.0685097	1.29264	1.35153	0.984317	1050	0.068398	1.48665	1.41602	1043.01	0.985904	1.99174	10.8278	194.403	-1.23886
0.155	-25.4433	-1.30636	3.06575e+06	0.0690281	1.30242	1.35493	0.984317	1050	0.0688967	1.54216	1.43343	1041.68	0.986173	1.98582	11.0957	194.403	-1.31299
0.15875	-25.3181	-1.35	3.06575e+06	0.0686883	1.29601	1.3527	0.984317	1050	0.0685383	1.57466	1.44343	1040.53	0.986451	1.98246	11.251	194.403	-1.35713
0.18285	-26.079	-1.49644	3.06575e+06	0.0707528	1.33496	1.36612	0.984317	1050	0.0705806	1.68076	1.47515	1038.99	0.986698	1.97201	11.751	194.403	-1.50496
0.1846	-25.6892	-1.43808	3.06575e+06	0.0696952	1.315	1.35928	0.984317	1050	0.0695288	1.63898	1.46282	1039.42	0.986651	1.97603	11.5554	194.403	-1.44607
0.1712	-25.4358	-1.42371	3.06575e+06	0.0690078	1.30203	1.3548	0.984317	1050	0.0688381	1.62863	1.45974	1039.27	0.986721	1.97705	11.5067	194.403	-1.43161
0.18245	-25.2732	-1.39635	3.06575e+06	0.0685666	1.29371	1.3519	0.984317	1050	0.0684005	1.60874	1.45377	1039.52	0.986686	1.97902	11.4128	194.403	-1.404
0.15815	-25.327	-1.34249	3.06575e+06	0.0687126	1.29646	1.35286	0.984317	1050	0.0685653	1.56909	1.44173	1040.7	0.98641	1.98303	11.2245	194.403	-1.34953
0.1489	-25.7029	-1.27653	3.06575e+06	0.0697324	1.3157	1.35952	0.984317	1050	0.0696203	1.51969	1.42644	1042.81	0.98588	1.98818	10.9877	194.403	-1.28279
0.1496	-25.5971	-1.33099	3.06575e+06	0.0694455	1.31029	1.35766	0.984317	1050	0.0693107	1.56051	1.43909	1041.42	0.986209	1.98391	11.1835	194.403	-1.33784
0.14945	-25.6463	-1.24845	3.06575e+06	0.0695789	1.31281	1.35853	0.984317	1050	0.0694751	1.49843	1.41975	1043.37	0.985765	1.99046	10.8849	194.403	-1.25445
0.15545	-25.8503	-1.34004	3.06575e+06	0.0701322	1.32325	1.36212	0.984317	1050	0.0700028	1.56717	1.44114	1041.67	0.986116	1.98323	11.2154	194.403	-1.34691
0.1797	-25.583	-1.43701	3.06575e+06	0.0694071	1.30957	1.35741	0.984317	1050	0.0692378	1.63822	1.4626	1039.26	0.986702	1.97611	11.5518	194.403	-1.44501
0.15995	-25.4373	-1.19055	3.06575e+06	0.0690117	1.30211	1.35482	0.984317	1050	0.0689226	1.45404	1.40559	1044.4	0.985569	1.99533	10.6689	194.403	-1.19604
0.21015	-25.9582	-1.48354	3.06575e+06	0.0704249	1.32877	1.36401	0.984317	1050	0.0702529	1.67159	1.47246	1039.03	0.986706	1.97288	11.7081	194.403	-1.49195
0.1576	-25.4495	-1.24341	3.06575e+06	0.069045	1.30274	1.35504	0.984317	1050	0.0689362	1.49463	1.41855	1043.12	0.985849	1.99087	10.8665	194.403	-1.24941
0.15365	-25.503	-1.30557	3.06575e+06	0.0691901	1.30547	1.35599	0.984317	1050	0.069061	1.54156	1.43325	1041.8	0.986137	1.98588	11.0928	194.403	-1.31218
0.1653	-25.6602	-1.25884	3.06575e+06	0.0696166	1.31352	1.35877	0.984317	1050	0.0695095	1.50632	1.42224	1043.15	0.985812	1.98961	10.9231	194.403	-1.26494
0.1983	-25.6342	-1.30764	3.06575e+06	0.0695459	1.31219	1.35831	0.984317	1050	0.0694204	1.54309	1.43372	1041.99	0.986075	1.98572	11.1001	194.403	-1.31424
0.1614	-25.7273	-1.29161	3.06575e+06	0.0697985	1.31695	1.35995	0.984317	1050	0.0696818	1.53105	1.42998	1042.51	0.985944	1.98698	11.0423	194.403	-1.29802
0.1905	-25.6598	-1.33604	3.06575e+06	0.0696155	1.3135	1.35876	0.984317	1050	0.0694811	1.56424	1.44024	1041.42	0.9862	1.98353	11.2014	194.403	-1.34292
0.17845	-25.6692	-1.41363	3.06575e+06	0.069641	1.31398	1.35893	0.984317	1050	0.0694816	1.62125	1.45753	1039.86	0.986554	1.97778	11.4719	194.403	-1.42135
0.16055	-26.1212	-1.2918	3.06575e+06	0.0708673	1.33712	1.36686	0.984317	1050	0.0707643	1.53112	1.43	1043.22	0.985728	1.98698	11.0427	194.403	-1.29811
0.16155	-25.9362	-1.22505	3.06575e+06	0.0703654	1.32765	1.36362	0.984317	1050	0.0702811	1.48051	1.41407	1044.47	0.985477	1.99241	10.798	194.403	-1.23076
0.2227	-25.9406	-1.54814	3.06575e+06	0.0703773	1.32787	1.3637	0.984317	1050	0.070186	1.71741	1.48579	1037.87	0.986978	1.96856	11.9211	194.403	-1.55732
0.21215	-25.9061	-1.33589	3.06575e+06	0.0702837	1.32611	1.3631	0.984317	1050	0.0701575	1.56408	1.44019	1041.86	0.986066	1.98354	11.2006	194.403	-1.34271
0.16695	-25.9114	-1.21377	3.06575e+06	0.0702979	1.32638	1.36319	0.984317	1050	0.0702171	1.47187	1.41131	1044.71	0.985428	1.99336	10.7559	194.403	-1.21938
0.1646	-25.7807	-1.23042	3.06575e+06	0.0699433	1.31969	1.36089	0.984317	1050	0.0698512	1.48465	1.41539	1044.05	0.985594	1.99196	10.8181	194.403	-1.23621
0.23355	-25.6892	-1.40792	3.06575e+06	0.0696951	1.315	1.35928	0.984317	1050	0.0695381	1.61709	1.45628	1040	0.986518	1.97819	11.4523	194.403	-1.41557
0.19545	-27.2771	-1.3185	3.06575e+06	0.074003	1.39628	1.38673	0.984317	1050	0.0739326	1.55089	1.43613	1044.67	0.985233	1.98491	11.1376	194.403	-1.3248
0.17	-25.9312	-1.25064	3.06575e+06	0.0703516	1.32739	1.36354	0.984317	1050	0.0702572	1.50004	1.42026	1043.84	0.985618	1.99029	10.8928	194.404	-1.25659
0.2108	-26.8057	-1.36998	3.06578e+06	0.0727237	1.37214	1.37869	0.984317	1050	0.0726166	1.58908	1.44782	1042.7	0.985747	1.98098	11.3198	194.405	-1.3769
0.2386	-26.8804	-1.43439	3.06578e+06	0.0729263	1.37597	1.37997	0.984317	1050	0.0727995	1.63604	1.46195	1041.5	0.986011	1.97631	11.5417	194.405	-1.44197
0.23725	-26.8471	-1.46703	3.06578e+06	0.0728359	1.37426	1.3794	0.984317	1050	0.0726971	1.65956	1.46892	1040.81	0.986175	1.97402	11.652	194.405	-1.47498
0.20915	-27.0905	-1.29377	3.06578e+06	0.0734961	1.38672	1.38356	0.984317	1050	0.0734282	1.53242	1.43041	1044.92	0.985205	1.98683	11.0491	194.405	-1.29987
0.21925	-27.0908	-1.24152	3.06578e+06	0.073497	1.38674	1.38356	0.984317	1050	0.0734505	1.4929	1.418	1046.2	0.984919	1.99105	10.8583	194.406	-1.24713
0.21025	-26.9496	-1.06153	3.06578e+06	0.073114	1.37951	1.38115	0.984317	1050	0.0731451	1.35192	1.37188	1051.1	0.983877	2.00716	10.1634	194.406	-1.06564
0.2392	-26.8119	-1.31334	3.06579e+06	0.0727402	1.37246	1.3788	0.984317	1050	0.0726542	1.54712	1.43497	1043.96	0.98546	1.98529	11.1196	194.406	-1.3197
0.21745	-27.1515	-1.27335	3.06579e+06	0.0736615	1.38984	1.38459	0.984317	1050	0.0736042	1.51703	1.4256	1045.52	0.985062	1.98846	10.975	194.406	-1.27924
0.22295	-27.2196	-1.27335	3.06578e+06	0.0738464	1.39333	1.38575	0.984317	1050	0.0737918	1.51702	1.4256	1045.64	0.985024	1.98846	10.9749	194.405	-1.27923
0.2291	-27.0675	-1.23135	3.06578e+06	0.0734339	1.38554	1.38317	0.984317	1050	0.0733907	1.48515	1.41554	1046.42	0.984875	1.99189	10.8206	194.405	-1.23688
0.24615	-27.1925	-1.261	3.06578e+06	0.073773	1.39194	1.38529	0.984317	1050	0.0737224	1.50768	1.42267	1045.9	0.984971	1.98946	10.9298	194.405	-1.26676
0.2462	-27.3892	-1.3363	3.06578e+06	0.0743065	1.40201	1.38862	0.984317	1050	0.0742335	1.5641	1.4402	1044.46	0.985265	1.98353	11.2008	194.405	-1.34274
0.2391	-26.7818	-1.22973	3.06577e+06	0.072659	1.37093	1.37828	0.984317	1050	0.0726051	1.48395	1.41517	1045.93	0.985026	1.99203	10.8148	194.404	-1.2353
0.24525	-26.8838	-1.18242	3.06577e+06	0.0729358	1.37615	1.38003	0.984317	1050	0.0729063	1.44751	1.40348	1047.37	0.984694	1.99605	10.637	194.404	-1.18754
0.2481	-26.6773	-1.2353	3.06576e+06	0.0723756	1.36558	1.37649	0.984317	1050	0.0723153	1.48823	1.41652	1045.59	0.985116	1.99156	10.8355	194.404	-1.24094
0.25925	-26.5728	-1.18837	3.06575e+06	0.0720922	1.36023	1.37469	0.984317	1050	0.0720475	1.45217	1.40499	1046.61	0.984907	1.99554	10.6597	194.404	-1.19361
0.2641	-26.871	-1.15115	3.06575e+06	0.0729015	1.3755	1.37981	0.984317	1050	0.0728855	1.42314	1.39556	1048.21	0.984511	1.99881	10.5172	194.403	-1.156

## Sheet: HxWxL=3x3x100 | d=1.6
Transit time of particle Dt (sec)	Signal at antinode Df_anti (Hz)	Signal Df_max near node (Hz)	baseline frequency f (Hz)	nominal buoyant mass m_bnom (pg)	reference volume V_ref (um3)	reference diameter d_ref (um)	nominal alpha_m	nominal density rho_nom (kg/m3)	measured buoyant mass m_b (pg)	measured volume V_meas (um3)	measured diameter d_meas (um)	measured density rho_p (kg/m3)	measured alpha_m	measured alpha_v	measured beta(R/H)^2	measured beta	Signal at node Df_node(Hz)
0.32775	-39.6434	-2.62153	3.06563e+06	0.107777	2.03352	1.57187	0.982314	1050	0.107535	2.39479	1.65993	1041.9	0.984503	1.91665	14.8786	194.396	-2.63882
0.33405	-43.7753	-2.87814	3.06563e+06	0.11901	2.24546	1.62469	0.982314	1050	0.118846	2.5399	1.6928	1043.79	0.983643	1.90765	15.4738	194.396	-2.89702
0.33165	-38.9451	-2.61978	3.06563e+06	0.105878	1.9977	1.56259	0.982314	1050	0.105612	2.39396	1.65974	1041.12	0.984773	1.9167	14.8752	194.396	-2.63737
0.33175	-40.5955	-2.77694	3.06563e+06	0.110365	2.08236	1.58435	0.982314	1050	0.11011	2.48368	1.68022	1041.33	0.98457	1.91106	15.2446	194.396	-2.79591
0.338	-42.7638	-2.99997	3.06563e+06	0.11626	2.19358	1.61207	0.982314	1050	0.116017	2.60789	1.70777	1041.49	0.984346	1.90362	15.7487	194.396	-3.02101
0.33265	-39.7603	-2.6657	3.06563e+06	0.108094	2.03952	1.57341	0.982314	1050	0.107843	2.42028	1.6658	1041.56	0.984583	1.91502	14.9841	194.396	-2.68354
0.3339	-38.7472	-2.5024	3.06563e+06	0.10534	1.98755	1.55993	0.982314	1050	0.105103	2.32537	1.64373	1042.2	0.984507	1.92117	14.5897	194.396	-2.51851
0.3334	-38.2334	-2.57117	3.06563e+06	0.103943	1.96119	1.55301	0.982314	1050	0.103667	2.36586	1.65322	1040.82	0.984915	1.91851	14.7586	194.396	-2.58843
0.26105	-40.1427	-2.62858	3.06563e+06	0.109134	2.05913	1.57844	0.982314	1050	0.108908	2.39874	1.66084	1042.4	0.984327	1.91639	14.895	194.396	-2.64574
0.21565	-43.0594	-2.94485	3.06563e+06	0.117063	2.20874	1.61578	0.982314	1050	0.116849	2.57729	1.70107	1042.34	0.984093	1.90542	15.6253	194.396	-2.96497
0.22025	-39.7547	-2.54725	3.06563e+06	0.108079	2.03923	1.57334	0.982314	1050	0.107865	2.35148	1.64986	1042.87	0.984239	1.91945	14.6987	194.396	-2.56351
0.2231	-39.1797	-2.55701	3.06563e+06	0.106516	2.00974	1.56572	0.982314	1050	0.106278	2.35733	1.65123	1042.08	0.984497	1.91907	14.7231	194.396	-2.57365
0.22385	-40.7949	-2.84127	3.06563e+06	0.110907	2.09259	1.58694	0.982314	1050	0.11064	2.51999	1.68837	1040.9	0.984667	1.90885	15.3928	194.396	-2.86106
0.2182	-41.8748	-2.89235	3.06563e+06	0.113843	2.14798	1.60082	0.982314	1050	0.1136	2.54835	1.69468	1041.58	0.984396	1.90714	15.5081	194.396	-2.91232
0.22075	-39.9365	-2.68998	3.06563e+06	0.108573	2.04855	1.57573	0.982314	1050	0.108321	2.4342	1.66899	1041.5	0.984583	1.91414	15.0415	194.396	-2.70806
0.22575	-40.1208	-2.79866	3.06563e+06	0.109074	2.05801	1.57815	0.982314	1050	0.108796	2.49612	1.68302	1040.59	0.98481	1.9103	15.2955	194.396	-2.81817
0.2274	-39.3861	-2.55221	3.06563e+06	0.107077	2.02032	1.56846	0.982314	1050	0.106848	2.35447	1.65056	1042.38	0.984401	1.91925	14.7112	194.396	-2.56869
0.2312	-40.1492	-2.63296	3.06563e+06	0.109152	2.05946	1.57853	0.982314	1050	0.108925	2.40128	1.66143	1042.36	0.984337	1.91623	14.9055	194.396	-2.65018
0.23065	-42.7173	-2.91506	3.06563e+06	0.116133	2.1912	1.61149	0.982314	1050	0.115915	2.56081	1.69743	1042.27	0.984141	1.9064	15.5586	194.396	-2.93493
0.2293	-38.5126	-2.59059	3.06563e+06	0.104702	1.97552	1.55678	0.982314	1050	0.104429	2.37711	1.65583	1040.93	0.98486	1.91778	14.8053	194.396	-2.60798
0.22865	-39.913	-2.6578	3.06563e+06	0.108509	2.04735	1.57542	0.982314	1050	0.108266	2.41569	1.66474	1041.82	0.984501	1.91531	14.9651	194.396	-2.67546
0.23235	-40.4419	-2.80274	3.06563e+06	0.109947	2.07448	1.58235	0.982314	1050	0.109679	2.49834	1.68352	1040.9	0.984698	1.91016	15.3045	194.396	-2.82216
0.23565	-39.4349	-2.64452	3.06563e+06	0.10721	2.02282	1.56911	0.982314	1050	0.106953	2.40815	1.66301	1041.41	0.984651	1.91579	14.9339	194.396	-2.66222
0.23815	-40.5182	-2.83363	3.06563e+06	0.110155	2.07839	1.58335	0.982314	1050	0.10988	2.51576	1.68742	1040.68	0.984751	1.9091	15.3756	194.396	-2.85344
0.2438	-40.5184	-2.76672	3.06563e+06	0.110155	2.0784	1.58335	0.982314	1050	0.109901	2.47789	1.67891	1041.35	0.984571	1.91142	15.2209	194.396	-2.78559
0.24265	-39.6952	-2.6418	3.06563e+06	0.107917	2.03617	1.57255	0.982314	1050	0.107671	2.40651	1.66263	1041.74	0.984541	1.9159	14.9272	194.396	-2.65935
0.2413	-42.9171	-2.98606	3.06563e+06	0.116677	2.20145	1.614	0.982314	1050	0.116444	2.60016	1.70608	1041.78	0.984254	1.90407	15.7176	194.396	-3.00682
0.2407	-41.1392	-2.73554	3.06563e+06	0.111843	2.11025	1.5914	0.982314	1050	0.111621	2.45997	1.67485	1042.38	0.984246	1.91253	15.1474	194.396	-2.75369
0.2462	-42.6387	-2.9993	3.06563e+06	0.11592	2.18716	1.6105	0.982314	1050	0.115673	2.60755	1.7077	1041.36	0.984391	1.90364	15.7474	194.396	-3.02039
0.2416	-38.7152	-2.49836	3.06563e+06	0.105253	1.98591	1.5595	0.982314	1050	0.105016	2.323	1.64317	1042.21	0.984508	1.92132	14.5798	194.396	-2.51443
0.2454	-39.8661	-2.72337	3.06563e+06	0.108382	2.04494	1.57481	0.982314	1050	0.108117	2.45336	1.67335	1041.07	0.984703	1.91294	15.1203	194.396	-2.74196
0.2504	-40.1738	-2.73748	3.06563e+06	0.109219	2.06073	1.57885	0.982314	1050	0.10896	2.46133	1.67516	1041.27	0.984623	1.91245	15.153	194.396	-2.75611
0.24725	-40.4434	-2.75708	3.06563e+06	0.109951	2.07456	1.58237	0.982314	1050	0.109697	2.47243	1.67768	1041.37	0.984574	1.91176	15.1985	194.396	-2.77585
0.2501	-39.9296	-2.60615	3.06563e+06	0.108555	2.0482	1.57564	0.982314	1050	0.108328	2.38579	1.65785	1042.41	0.984345	1.91722	14.8414	194.396	-2.62311
0.24545	-39.5395	-2.59434	3.06563e+06	0.107494	2.02819	1.57049	0.982314	1050	0.107257	2.37902	1.65628	1042.08	0.984465	1.91766	14.8133	194.396	-2.61131
0.25185	-40.2455	-2.65475	3.06563e+06	0.109413	2.0644	1.57979	0.982314	1050	0.109183	2.41384	1.66432	1042.23	0.984362	1.91543	14.9575	194.396	-2.67222
0.25205	-40.1813	-2.62355	3.06563e+06	0.109239	2.06111	1.57895	0.982314	1050	0.109017	2.39582	1.66017	1042.5	0.984297	1.91658	14.8829	194.396	-2.64063
0.2565	-39.3442	-2.5894	3.06563e+06	0.106963	2.01817	1.56791	0.982314	1050	0.10672	2.3762	1.65562	1041.91	0.984528	1.91784	14.8016	194.396	-2.6064
0.25375	-40.0364	-2.56101	3.06563e+06	0.108845	2.05368	1.57705	0.982314	1050	0.108638	2.35946	1.65173	1043.04	0.984168	1.91893	14.732	194.396	-2.57733
0.2589	-40.3728	-2.6816	3.06563e+06	0.109759	2.07093	1.58145	0.982314	1050	0.109526	2.42928	1.66786	1042.09	0.98439	1.91445	15.0212	194.396	-2.69937
0.26005	-39.9412	-2.63531	3.06563e+06	0.108586	2.0488	1.5758	0.982314	1050	0.108351	2.40269	1.66175	1042.1	0.984426	1.91614	14.9114	194.396	-2.65266
0.25575	-39.7562	-2.67878	3.06563e+06	0.108083	2.03931	1.57336	0.982314	1050	0.107828	2.42782	1.66753	1041.41	0.984622	1.91454	15.0151	194.396	-2.6968
0.25555	-39.8808	-2.60851	3.06563e+06	0.108422	2.0457	1.575	0.982314	1050	0.108193	2.38717	1.65817	1042.32	0.984371	1.91713	14.8471	194.396	-2.62553
0.25965	-40.5333	-2.68974	3.06563e+06	0.110196	2.07917	1.58354	0.982314	1050	0.109965	2.43391	1.66892	1042.18	0.98435	1.91416	15.0403	194.396	-2.70755
0.25495	-39.2081	-2.57044	3.06563e+06	0.106593	2.01119	1.56609	0.982314	1050	0.106351	2.36518	1.65306	1041.97	0.984526	1.91856	14.7558	194.396	-2.58724
0.2594	-40.6186	-2.804	3.06563e+06	0.110428	2.08354	1.58465	0.982314	1050	0.110165	2.49901	1.68367	1041.08	0.984634	1.91012	15.3073	194.396	-2.82335
0.26575	-42.9342	-3.05303	3.06563e+06	0.116723	2.20232	1.61421	0.982314	1050	0.116471	2.63703	1.71411	1041.17	0.984419	1.90193	15.8658	194.396	-3.07475
0.25695	-39.5272	-2.56529	3.06563e+06	0.107461	2.02756	1.57033	0.982314	1050	0.107232	2.36209	1.65234	1042.4	0.984384	1.91876	14.7429	194.396	-2.58189
0.25755	-39.1567	-2.40651	3.06563e+06	0.106453	2.00855	1.56541	0.982314	1050	0.106264	2.26835	1.63019	1043.85	0.984042	1.92499	14.3502	194.396	-2.42123
0.2659	-39.7566	-2.62005	3.06563e+06	0.108084	2.03932	1.57336	0.982314	1050	0.107847	2.3939	1.65972	1042.05	0.984454	1.9167	14.875	194.396	-2.63728
0.26765	-40.4753	-2.66764	3.06563e+06	0.110038	2.07619	1.58279	0.982314	1050	0.109813	2.42121	1.66601	1042.35	0.98431	1.91496	14.9879	194.396	-2.68517
0.2658	-39.2987	-2.73718	3.06563e+06	0.106839	2.01584	1.5673	0.982314	1050	0.10655	2.4614	1.67518	1040.29	0.98496	1.91244	15.1533	194.396	-2.75623
0.2681	-38.8737	-2.37877	3.06563e+06	0.105684	1.99404	1.56163	0.982314	1050	0.105493	2.25179	1.62621	1043.85	0.984068	1.92612	14.2803	194.396	-2.39325
0.26895	-40.7976	-2.72109	3.06563e+06	0.110914	2.09273	1.58698	0.982314	1050	0.110684	2.4518	1.673	1042.14	0.984337	1.91304	15.1139	194.396	-2.7392
0.27185	-41.2683	-2.64741	3.06563e+06	0.112194	2.11687	1.59306	0.982314	1050	0.112006	2.40935	1.66329	1043.49	0.98394	1.91572	14.9389	194.396	-2.66433
0.2724	-41.4606	-2.78956	3.06563e+06	0.112717	2.12673	1.59553	0.982314	1050	0.11249	2.4906	1.68178	1042.17	0.984274	1.91064	15.2729	194.396	-2.80829
0.27545	-40.5123	-2.74267	3.06563e+06	0.110139	2.07809	1.58327	0.982314	1050	0.109891	2.4642	1.67581	1041.59	0.984507	1.91227	15.1648	194.396	-2.76121
0.28045	-39.3204	-2.85432	3.06563e+06	0.106898	2.01695	1.56759	0.982314	1050	0.106577	2.52776	1.6901	1039.16	0.985258	1.90837	15.4245	194.396	-2.87506
0.2805	-41.1555	-2.69999	3.06563e+06	0.111887	2.11108	1.59161	0.982314	1050	0.111678	2.43963	1.67023	1042.78	0.984138	1.9138	15.0638	194.396	-2.71766
0.28085	-41.2966	-2.78599	3.06563e+06	0.112271	2.11832	1.59342	0.982314	1050	0.112039	2.48862	1.68133	1042.02	0.984326	1.91076	15.2648	194.396	-2.80476
0.27195	-40.0603	-2.53222	3.06563e+06	0.10891	2.0549	1.57736	0.982314	1050	0.108713	2.34259	1.64778	1043.41	0.984071	1.92003	14.6617	194.396	-2.54816
0.28135	-40.6675	-2.73285	3.06563e+06	0.110561	2.08605	1.58529	0.982314	1050	0.110322	2.45856	1.67453	1041.87	0.98442	1.91262	15.1416	194.396	-2.75118
0.28345	-43.4443	-2.90469	3.06563e+06	0.11811	2.22849	1.62058	0.982314	1050	0.117924	2.55483	1.69611	1043.16	0.98384	1.90675	15.5344	194.396	-2.92408
0.2821	-41.0288	-2.67327	3.06563e+06	0.111543	2.10458	1.58997	0.982314	1050	0.111337	2.42432	1.66672	1042.93	0.98411	1.91477	15.0007	194.396	-2.69064
0.2793	-40.9789	-2.78187	3.06563e+06	0.111407	2.10202	1.58933	0.982314	1050	0.111165	2.48637	1.68082	1041.71	0.984436	1.9109	15.2556	194.396	-2.80073
0.2882	-41.1772	-2.75827	3.06563e+06	0.111946	2.1122	1.59189	0.982314	1050	0.111719	2.47291	1.67779	1042.18	0.984295	1.91173	15.2005	194.396	-2.77671
0.28935	-39.7118	-2.55087	3.06563e+06	0.107962	2.03703	1.57277	0.982314	1050	0.107746	2.35361	1.65036	1042.78	0.984267	1.91931	14.7076	194.396	-2.5672
0.2929	-41.483	-2.75589	3.06563e+06	0.112778	2.12788	1.59582	0.982314	1050	0.112563	2.47148	1.67746	1042.54	0.984171	1.91182	15.1946	194.396	-2.77416
0.28705	-40.1937	-2.56263	3.06563e+06	0.109273	2.06175	1.57911	0.982314	1050	0.109071	2.36037	1.65194	1043.21	0.98411	1.91887	14.7357	194.396	-2.5789
0.29045	-40.0453	-2.45007	3.06563e+06	0.108869	2.05414	1.57716	0.982314	1050	0.1087	2.2941	1.63633	1044.38	0.983819	1.92325	14.4586	194.396	-2.46498
0.284	-40.3231	-2.59555	3.06563e+06	0.109624	2.06838	1.5808	0.982314	1050	0.109417	2.37953	1.6564	1042.98	0.984158	1.91763	14.8154	194.396	-2.6122
0.3583	-41.0874	-2.79966	3.06563e+06	0.111702	2.10759	1.59073	0.982314	1050	0.111458	2.49642	1.68309	1041.65	0.984444	1.91028	15.2967	194.396	-2.81871
0.36435	-41.542	-2.78504	3.06563e+06	0.112938	2.13091	1.59657	0.982314	1050	0.112716	2.48802	1.6812	1042.3	0.98423	1.9108	15.2623	194.396	-2.80368
0.37325	-40.9786	-2.63382	3.06563e+06	0.111406	2.10201	1.58932	0.982314	1050	0.111212	2.40157	1.66149	1043.31	0.984014	1.91621	14.9067	194.396	-2.65069
0.37245	-40.4339	-2.52172	3.06563e+06	0.109926	2.07407	1.58225	0.982314	1050	0.109747	2.33634	1.64631	1043.97	0.983889	1.92045	14.6356	194.396	-2.53738
0.38715	-40.9531	-2.56503	3.06563e+06	0.111337	2.1007	1.58899	0.982314	1050	0.111165	2.36159	1.65222	1044.07	0.983815	1.91879	14.7408	194.396	-2.58102
0.3885	-41.719	-2.62651	3.06563e+06	0.113419	2.13999	1.59884	0.982314	1050	0.113257	2.39716	1.66048	1044.25	0.983701	1.9165	14.8885	194.396	-2.64297

## Sheet: HxWxL=3x8x210 | d=1.8
Transit time of particle Dt (sec)	Signal at antinode Df_anti (Hz)	Signal Df_max near node (Hz)	baseline frequency f (Hz)	nominal buoyant mass m_bnom (pg)	reference volume V_ref (um3)	reference diameter d_ref (um)	nominal alpha_m	nominal density rho_nom (kg/m3)	measured buoyant mass m_b (pg)	measured volume V_meas (um3)	measured diameter d_meas (um)	measured density rho_p (kg/m3)	measured alpha_m	measured alpha_v	measured beta(R/H)^2	measured beta	Signal at node Df_node(Hz)
0.45504	-2.0108	-0.0893516	1.45799e+06	0.147008	2.77373	1.74323	0.985944	1050	0.146557	3.90902	1.95444	1034.49	0.988956	3.42864	9.80993	92.4533	-0.0897427
0.3136	-1.98081	-0.0862906	1.45799e+06	0.144815	2.73236	1.73452	0.985944	1050	0.144375	3.81441	1.93855	1034.85	0.98893	3.44889	9.65099	92.4533	-0.0866607
0.31552	-1.95844	-0.0655139	1.45799e+06	0.14318	2.70151	1.72797	0.985944	1050	0.142958	3.1432	1.81743	1042.48	0.987456	3.61161	8.48273	92.4533	-0.0657284
0.37152	-1.97864	-0.0767812	1.45799e+06	0.144657	2.72938	1.73389	0.985944	1050	0.144312	3.51366	1.8862	1038.07	0.988278	3.5173	9.1368	92.4533	-0.0770737
0.42624	-2.03162	-0.0904957	1.45799e+06	0.14853	2.80246	1.74923	0.985944	1050	0.148081	3.94408	1.96027	1034.55	0.988913	3.42128	9.86851	92.4533	-0.0908928
0.3072	-1.98715	-0.0671154	1.45799e+06	0.145279	2.74111	1.73637	0.985944	1050	0.145059	3.19682	1.82771	1042.38	0.98742	3.59717	8.57892	92.4533	-0.0673373
0.3728	-2.04449	-0.0788931	1.45799e+06	0.149471	2.82021	1.75292	0.985944	1050	0.14915	3.581	1.89817	1038.65	0.988048	3.5014	9.25317	92.4533	-0.079192
0.29952	-2.00925	-0.0430527	1.45799e+06	0.146895	2.7716	1.74279	0.985944	1050	0.147142	2.34192	1.64762	1059.83	0.984266	3.87127	6.97164	92.4533	-0.0431423
0.38144	-2.02412	-0.0816403	1.45799e+06	0.147982	2.79211	1.74707	0.985944	1050	0.147616	3.66834	1.91348	1037.24	0.988368	3.4813	9.40301	92.4533	-0.0819638
0.35328	-2.00448	-0.0671288	1.45799e+06	0.146546	2.76502	1.7414	0.985944	1050	0.14634	3.19721	1.82778	1042.77	0.987311	3.59707	8.57961	92.4533	-0.0673489
0.312	-2.00193	-0.0828749	1.45799e+06	0.146359	2.7615	1.74067	0.985944	1050	0.145965	3.70739	1.92025	1036.37	0.988582	3.47249	9.46963	92.4533	-0.0832122
0.34944	-2.00168	-0.069206	1.45799e+06	0.146341	2.76116	1.74059	0.985944	1050	0.146105	3.26634	1.84086	1041.73	0.987517	3.57887	8.70285	92.4533	-0.0694403
0.26112	-1.95563	-0.0497282	1.45799e+06	0.142975	2.69763	1.72714	0.985944	1050	0.143007	2.59083	1.70404	1052.2	0.985696	3.78019	7.45727	92.4532	-0.0498514
0.2752	-2.01245	-0.0955714	1.45799e+06	0.147129	2.77602	1.74371	0.985944	1050	0.146624	4.09887	1.98559	1032.77	0.989317	3.38964	10.125	92.4532	-0.0960192
0.27552	-1.99787	-0.0931973	1.45799e+06	0.146063	2.75591	1.73949	0.985944	1050	0.14557	4.02691	1.9739	1033.15	0.989259	3.40418	10.0062	92.4532	-0.093626
0.27712	-1.97102	-0.0704277	1.45799e+06	0.1441	2.71886	1.73166	0.985944	1050	0.143824	3.30684	1.84844	1040.49	0.987814	3.56842	8.77464	92.4532	-0.0706744
0.26496	-2.01435	-0.0708205	1.45799e+06	0.147268	2.77864	1.74426	0.985944	1050	0.147021	3.3196	1.85081	1041.29	0.987579	3.56516	8.79719	92.4532	-0.0710644
0.31104	-2.02075	-0.0661347	1.45799e+06	0.147735	2.78746	1.7461	0.985944	1050	0.147557	3.16385	1.8214	1043.64	0.987114	3.60602	8.51982	92.4532	-0.0663464
0.28128	-2.02426	-0.0578511	1.45799e+06	0.147992	2.79231	1.74712	0.985944	1050	0.147947	2.88042	1.7653	1048.36	0.986224	3.68693	8.00309	92.4532	-0.0580125
0.25824	-2.00648	-0.0803093	1.45799e+06	0.146692	2.76778	1.74198	0.985944	1050	0.146328	3.62627	1.90614	1037.35	0.988375	3.49092	9.33097	92.4532	-0.0806251
0.28576	-1.98774	-0.0614546	1.45799e+06	0.145322	2.74192	1.73654	0.985944	1050	0.145183	3.00519	1.79043	1045.31	0.986864	3.65017	8.23256	92.4532	-0.0616402
0.2624	-1.97381	-0.0583944	1.45799e+06	0.144304	2.72272	1.73248	0.985944	1050	0.144201	2.8995	1.76919	1046.73	0.98663	3.68118	8.03839	92.4532	-0.0585631
0.2672	-2.03327	-0.0471873	1.45799e+06	0.148651	2.80474	1.7497	0.985944	1050	0.148828	2.49721	1.68326	1056.6	0.984749	3.81313	7.27653	92.4532	-0.0472939
0.25792	-2.03724	-0.0840537	1.45799e+06	0.148941	2.81021	1.75084	0.985944	1050	0.148559	3.74423	1.92658	1036.68	0.988461	3.46428	9.53225	92.4532	-0.0843946
0.25632	-1.9741	-0.0876406	1.45799e+06	0.144325	2.72311	1.73256	0.985944	1050	0.143868	3.85637	1.94563	1034.31	0.989053	3.43984	9.72164	92.4532	-0.0880238
0.25952	-2.00477	-0.0731537	1.45799e+06	0.146567	2.76542	1.74149	0.985944	1050	0.146284	3.39607	1.86492	1040.07	0.987834	3.54592	8.93178	92.4532	-0.0734154
0.26944	-2.03718	-0.0755277	1.45799e+06	0.148937	2.81013	1.75082	0.985944	1050	0.148649	3.47298	1.87889	1039.8	0.98783	3.52707	9.06614	92.4532	-0.0758023
0.26464	-2.01547	-0.066963	1.45799e+06	0.14735	2.78018	1.74458	0.985944	1050	0.147155	3.19162	1.82672	1043.11	0.987225	3.59856	8.56962	92.4532	-0.0671807
0.26368	-2.02071	-0.0699847	1.45799e+06	0.147732	2.7874	1.74609	0.985944	1050	0.147501	3.29202	1.84567	1041.81	0.987466	3.57222	8.7484	92.4532	-0.0702221
0.25248	-2.01378	-0.071964	1.45799e+06	0.147226	2.77784	1.74409	0.985944	1050	0.146964	3.35715	1.85776	1040.78	0.98768	3.55564	8.86341	92.4532	-0.0722161
0.2752	-1.997	-0.0600539	1.45799e+06	0.145999	2.7547	1.73924	0.985944	1050	0.14589	2.95697	1.7808	1046.34	0.986654	3.66415	8.14426	92.4532	-0.0602303
0.28288	-2.04278	-0.0833741	1.45799e+06	0.149346	2.81786	1.75243	0.985944	1050	0.148975	3.72288	1.92291	1037.02	0.988382	3.46903	9.49598	92.4532	-0.0837086
0.25248	-2.02919	-0.0722578	1.45799e+06	0.148352	2.7991	1.74853	0.985944	1050	0.148099	3.3667	1.85953	1040.99	0.98761	3.55324	8.88022	92.4532	-0.0725099
0.25216	-1.99006	-0.0763838	1.45799e+06	0.145492	2.74513	1.73722	0.985944	1050	0.145159	3.50081	1.8839	1038.46	0.988179	3.52037	9.11451	92.4533	-0.0766715
0.26624	-2.069	-0.0419209	1.45799e+06	0.151263	2.85402	1.75989	0.985944	1050	0.151622	2.29853	1.63738	1062.96	0.983591	3.88839	6.88527	92.4533	-0.0420034
0.33696	-1.99017	-0.0765458	1.45799e+06	0.145499	2.74527	1.73725	0.985944	1050	0.145165	3.50603	1.88483	1038.4	0.988191	3.51912	9.12356	92.4533	-0.0768348
0.25856	-2.03767	-0.0767442	1.45799e+06	0.148972	2.8108	1.75096	0.985944	1050	0.148671	3.51219	1.88593	1039.33	0.987923	3.51765	9.13425	92.4533	-0.0770278
0.28672	-2.02969	-0.0541262	1.45799e+06	0.148389	2.79979	1.74867	0.985944	1050	0.148417	2.74914	1.73807	1050.99	0.985738	3.72771	7.75804	92.4533	-0.0542669
0.3056	-2.03139	-0.0980565	1.45799e+06	0.148514	2.80214	1.74916	0.985944	1050	0.147998	4.17364	1.99759	1032.46	0.989356	3.37483	10.2478	92.4533	-0.0985238
0.25152	-2.05656	-0.0308261	1.45799e+06	0.150353	2.83685	1.75636	0.985944	1050	0.151075	1.85323	1.52397	1078.52	0.981212	4.09168	5.9645	92.4533	-0.0308709
0.25248	-2.00906	-0.065655	1.45799e+06	0.146881	2.77134	1.74273	0.985944	1050	0.146699	3.14777	1.81831	1043.6	0.987143	3.61037	8.49094	92.4533	-0.0658649
0.2512	-2.02699	-0.0587938	1.45799e+06	0.148191	2.79607	1.7479	0.985944	1050	0.148133	2.91323	1.77198	1047.85	0.986313	3.67708	8.06376	92.4533	-0.0589603
0.264	-1.9716	-0.0498083	1.45799e+06	0.144142	2.71966	1.73183	0.985944	1050	0.14419	2.59372	1.70467	1052.59	0.985589	3.7792	7.46281	92.4533	-0.0499308
0.30304	-1.97823	-0.0866447	1.45799e+06	0.144627	2.72881	1.73377	0.985944	1050	0.144182	3.82543	1.94041	1034.69	0.988967	3.4465	9.66959	92.4533	-0.0870183
0.248	-1.99905	-0.0393062	1.45799e+06	0.146149	2.75753	1.73983	0.985944	1050	0.146484	2.19727	1.61298	1063.67	0.983668	3.92995	6.68153	92.4533	-0.0393812
0.304	-2.03296	-0.0719008	1.45799e+06	0.148628	2.8043	1.74961	0.985944	1050	0.148382	3.355	1.85737	1041.23	0.987556	3.55618	8.85963	92.4533	-0.0721499
0.26176	-2.02679	-0.057792	1.45799e+06	0.148177	2.79579	1.74784	0.985944	1050	0.148135	2.87835	1.76488	1048.47	0.9862	3.68755	7.99926	92.4533	-0.0579528
0.25728	-2.04036	-0.0768356	1.45799e+06	0.149169	2.81451	1.75173	0.985944	1050	0.148868	3.51512	1.88646	1039.35	0.987914	3.51694	9.13933	92.4533	-0.0771195
0.25184	-2.05353	-0.08654	1.45799e+06	0.150132	2.83268	1.75549	0.985944	1050	0.149735	3.82175	1.93979	1036.18	0.988537	3.44729	9.66338	92.4533	-0.0868987
0.25248	-2.04448	-0.0858006	1.45799e+06	0.14947	2.8202	1.75291	0.985944	1050	0.149075	3.79879	1.9359	1036.24	0.988539	3.45228	9.62463	92.4533	-0.0861547
0.24736	-2.00074	-0.0542014	1.45799e+06	0.146272	2.75985	1.74032	0.985944	1050	0.146268	2.75189	1.73865	1050.15	0.985953	3.72683	7.76322	92.4533	-0.0543446
0.27648	-2.02237	-0.0620701	1.45799e+06	0.147854	2.7897	1.74657	0.985944	1050	0.147738	3.02616	1.79459	1045.82	0.986698	3.64418	8.27082	92.4533	-0.0622562
0.2768	-2.00002	-0.0760125	1.45799e+06	0.14622	2.75886	1.74011	0.985944	1050	0.145899	3.4888	1.88174	1038.82	0.988091	3.52325	9.09365	92.4533	-0.076296
0.24544	-2.00928	-0.0599193	1.45799e+06	0.146896	2.77163	1.74279	0.985944	1050	0.146802	2.95228	1.77986	1046.72	0.986557	3.66552	8.13566	92.4533	-0.0600938
0.24576	-2.0131	-0.0605813	1.45799e+06	0.147176	2.7769	1.7439	0.985944	1050	0.147074	2.9751	1.78444	1046.44	0.986603	3.65886	8.17753	92.4533	-0.0607594
0.26784	-2.01639	-0.0858023	1.45799e+06	0.147417	2.78145	1.74485	0.985944	1050	0.147003	3.79899	1.93593	1035.7	0.988697	3.45224	9.62499	92.4533	-0.0861615
0.24256	-1.99953	-0.0536058	1.45799e+06	0.146184	2.75819	1.73997	0.985944	1050	0.146189	2.73067	1.73416	1050.54	0.985887	3.73363	7.72326	92.4533	-0.053746
0.24256	-2.04058	-0.0618273	1.45799e+06	0.149185	2.81482	1.7518	0.985944	1050	0.14909	3.01779	1.79293	1046.4	0.986552	3.64656	8.25557	92.4533	-0.0620103
0.24736	-2.03026	-0.0910426	1.45799e+06	0.148431	2.80058	1.74884	0.985944	1050	0.147976	3.96087	1.96305	1034.36	0.988954	3.41777	9.89649	92.4533	-0.0914448
0.25952	-2.03953	-0.0674553	1.45799e+06	0.149109	2.81337	1.7515	0.985944	1050	0.148928	3.20798	1.82983	1043.42	0.987118	3.59419	8.59889	92.4533	-0.0676736
0.29824	-2.03735	-0.074953	1.45799e+06	0.148949	2.81036	1.75087	0.985944	1050	0.148668	3.4544	1.87553	1040.04	0.987783	3.53157	9.03377	92.4533	-0.0752234
0.24608	-2.06069	-0.051504	1.45799e+06	0.150655	2.84255	1.75753	0.985944	1050	0.15077	2.65507	1.71801	1053.79	0.985171	3.75842	7.58005	92.4534	-0.0516294
0.24384	-1.98847	-0.0602931	1.45799e+06	0.145375	2.74293	1.73675	0.985944	1050	0.145255	2.96525	1.78246	1045.99	0.986737	3.66173	8.15947	92.4534	-0.0604717
0.29152	-2.04908	-0.0681768	1.45799e+06	0.149806	2.82653	1.75422	0.985944	1050	0.149624	3.23199	1.83438	1043.29	0.987125	3.58785	8.64174	92.4534	-0.0683988
0.26112	-2.02951	-0.0728297	1.45799e+06	0.148376	2.79954	1.74862	0.985944	1050	0.148115	3.3854	1.86296	1040.75	0.987656	3.54856	8.91307	92.4534	-0.0730859
0.28192	-2.00176	-0.0199101	1.45799e+06	0.146347	2.76126	1.74062	0.985944	1050	0.147561	1.36369	1.37586	1105.21	0.977807	4.40417	4.86145	92.4534	-0.0199292
0.30752	-2.03856	-0.0838721	1.45799e+06	0.149038	2.81203	1.75122	0.985944	1050	0.148658	3.73853	1.92561	1036.76	0.988441	3.46554	9.52259	92.4534	-0.0842113
0.2528	-2.01603	-0.0683667	1.45799e+06	0.14739	2.78094	1.74474	0.985944	1050	0.147177	3.23843	1.8356	1042.45	0.987351	3.58615	8.65321	92.4534	-0.0685936
0.24864	-2.00884	-0.0799953	1.45799e+06	0.146865	2.77103	1.74267	0.985944	1050	0.146506	3.61628	1.90438	1037.51	0.988338	3.49321	9.31385	92.4534	-0.0803082
0.24864	-1.9873	-0.0379386	1.458e+06	0.14529	2.74132	1.73642	0.985944	1050	0.145648	2.14346	1.5997	1064.95	0.983497	3.95302	6.57201	92.4534	-0.0380089
0.24448	-2.06831	-0.0654445	1.458e+06	0.151212	2.85305	1.75969	0.985944	1050	0.151086	3.14048	1.81691	1045.11	0.986741	3.61234	8.47785	92.4534	-0.0656469
0.27872	-2.01042	-0.0777016	1.458e+06	0.14698	2.77321	1.74312	0.985944	1050	0.146647	3.54306	1.89144	1038.39	0.988159	3.51031	9.1877	92.4534	-0.0779964
0.25344	-2.02668	-0.0903463	1.458e+06	0.148169	2.79564	1.74781	0.985944	1050	0.147718	3.93953	1.95951	1034.5	0.988931	3.42222	9.86092	92.4534	-0.0907431
0.31136	-2.05486	-0.0855808	1.458e+06	0.150229	2.83451	1.75587	0.985944	1050	0.149842	3.79188	1.93472	1036.52	0.988465	3.45379	9.61297	92.4534	-0.0859313
0.312	-2.01197	-0.0801429	1.458e+06	0.147094	2.77535	1.74357	0.985944	1050	0.146735	3.62095	1.9052	1037.52	0.988331	3.49214	9.32187	92.4534	-0.0804564
0.31552	-2.04019	-0.0769083	1.458e+06	0.149156	2.81427	1.75168	0.985944	1050	0.148855	3.51746	1.88688	1039.32	0.987921	3.51638	9.1434	92.4534	-0.0771928
0.26624	-2.0511	-0.0552041	1.45799e+06	0.149954	2.82933	1.7548	0.985944	1050	0.149984	2.78724	1.74606	1050.81	0.985723	3.7158	7.82957	92.4534	-0.055349
0.32544	-2.06678	-0.0813481	1.45799e+06	0.1511	2.85095	1.75926	0.985944	1050	0.150767	3.65889	1.91183	1038.21	0.9881	3.48344	9.38687	92.4534	-0.0816626
0.24064	-2.00295	-0.0544933	1.45799e+06	0.146434	2.7629	1.74096	0.985944	1050	0.146426	2.76227	1.74083	1050.01	0.985973	3.7235	7.78273	92.4534	-0.0546379
0.31232	-2.05218	-0.0461947	1.45799e+06	0.150033	2.83081	1.75511	0.985944	1050	0.150257	2.46027	1.67492	1058.07	0.984451	3.82654	7.2046	92.4534	-0.0462959
0.30688	-2.03859	-0.0714003	1.45799e+06	0.14904	2.81207	1.75123	0.985944	1050	0.148805	3.33856	1.85433	1041.57	0.987479	3.56033	8.83068	92.4534	-0.0716453
0.38784	-1.99306	-0.0777838	1.45799e+06	0.145711	2.74926	1.73809	0.985944	1050	0.145365	3.54578	1.89193	1038	0.988268	3.50967	9.1924	92.4534	-0.0780819
0.32576	-2.00865	-0.0631575	1.45799e+06	0.146851	2.77077	1.74261	0.985944	1050	0.146705	3.06329	1.8019	1044.89	0.9869	3.63368	8.33834	92.4534	-0.0633516
0.37088	-2.00285	-0.0821154	1.45799e+06	0.146426	2.76276	1.74093	0.985944	1050	0.146041	3.68345	1.9161	1036.65	0.988524	3.47788	9.42884	92.4534	-0.0824464
0.37376	-1.96416	-0.0881113	1.45799e+06	0.143598	2.70939	1.72965	0.985944	1050	0.143131	3.871	1.94809	1033.98	0.989138	3.43671	9.74624	92.4534	-0.0885007
0.2688	-2.03265	-0.0436975	1.45799e+06	0.148605	2.80387	1.74952	0.985944	1050	0.148866	2.36638	1.65334	1059.91	0.984192	3.86179	7.02012	92.4534	-0.0437888
0.34816	-2.0075	-0.0711583	1.45799e+06	0.146766	2.76917	1.74228	0.985944	1050	0.146509	3.33074	1.85288	1040.99	0.98765	3.56232	8.81688	92.4534	-0.0714055
0.27168	-2.06127	-0.0544569	1.45799e+06	0.150697	2.84335	1.7577	0.985944	1050	0.150753	2.76082	1.74052	1051.6	0.985557	3.72398	7.78001	92.4534	-0.0545971
0.27392	-2.05503	-0.0847502	1.45799e+06	0.150241	2.83474	1.75592	0.985944	1050	0.149863	3.76594	1.9303	1036.79	0.988408	3.45948	9.56908	92.4534	-0.0850938
0.40256	-2.00283	-0.0762506	1.45799e+06	0.146425	2.76273	1.74093	0.985944	1050	0.146103	3.49646	1.88311	1038.79	0.988093	3.52141	9.10696	92.4534	-0.0765354
0.31264	-2.02499	-0.052189	1.45799e+06	0.148045	2.7933	1.74732	0.985944	1050	0.148105	2.67984	1.72334	1052.27	0.985521	3.7502	7.62712	92.4533	-0.05232
0.27008	-2.03387	-0.0627887	1.45799e+06	0.148695	2.80556	1.74987	0.985944	1050	0.148578	3.05065	1.79941	1045.7	0.986697	3.63724	8.31539	92.4533	-0.0629782
0.28768	-1.99111	-0.056623	1.45799e+06	0.145569	2.74658	1.73752	0.985944	1050	0.145511	2.83752	1.75649	1048.28	0.986311	3.7	7.92343	92.4533	-0.0567802
0.29536	-2.02843	-0.083006	1.45799e+06	0.148297	2.79806	1.74831	0.985944	1050	0.147919	3.71138	1.92093	1036.86	0.988439	3.4716	9.47643	92.4533	-0.0833399
0.36352	-2.03615	-0.100495	1.45799e+06	0.148861	2.80871	1.75053	0.985944	1050	0.148329	4.2466	2.00916	1031.93	0.989463	3.36066	10.3669	92.4533	-0.100985
0.26848	-2.03188	-0.0595441	1.45799e+06	0.148549	2.80281	1.7493	0.985944	1050	0.148483	2.93924	1.77724	1047.52	0.986364	3.66936	8.11168	92.4533	-0.0597144
0.26912	-2.03101	-0.0551649	1.45799e+06	0.148486	2.80162	1.74905	0.985944	1050	0.148495	2.786	1.7458	1050.3	0.985858	3.71602	7.82723	92.4533	-0.055311
0.344	-2.02352	-0.0781546	1.45799e+06	0.147938	2.79128	1.7469	0.985944	1050	0.147609	3.5575	1.89401	1038.49	0.988116	3.50691	9.21265	92.4533	-0.0784509
0.3728	-1.97974	-0.0890271	1.45799e+06	0.144737	2.73089	1.73421	0.985944	1050	0.144271	3.8992	1.95281	1034	0.989108	3.43071	9.7935	92.4533	-0.0894215
0.35424	-2.04012	-0.0943084	1.45799e+06	0.149152	2.81418	1.75167	0.985944	1050	0.148673	4.06042	1.97936	1033.62	0.989096	3.39736	10.0616	92.4533	-0.0947382
0.26656	-1.99875	-0.0635987	1.45799e+06	0.146127	2.75711	1.73974	0.985944	1050	0.145966	3.07831	1.80484	1044.42	0.987009	3.62948	8.36558	92.4533	-0.0637966
0.27584	-1.99787	-0.0588135	1.45799e+06	0.146063	2.7559	1.73949	0.985944	1050	0.145975	2.914	1.77214	1047.09	0.986513	3.67685	8.06519	92.4533	-0.0589826
0.336	-1.98778	-0.064851	1.45799e+06	0.145325	2.74198	1.73655	0.985944	1050	0.145136	3.12075	1.81309	1043.51	0.987203	3.61774	8.44229	92.4533	-0.0650579
0.26944	-1.94907	-0.022446	1.45799e+06	0.142495	2.68858	1.72521	0.985944	1050	0.143429	1.48356	1.41504	1093.68	0.9795	4.31534	5.14231	92.4533	-0.022471
0.3584	-2.0529	-0.0610017	1.45799e+06	0.150086	2.83181	1.75532	0.985944	1050	0.150016	2.98944	1.7873	1047.18	0.986382	3.65471	8.20378	92.4533	-0.0611787
0.28576	-2.02185	-0.0758751	1.45799e+06	0.147816	2.78898	1.74642	0.985944	1050	0.147513	3.48427	1.88092	1039.34	0.98795	3.52434	9.08577	92.4533	-0.0761544
0.2656	-2.02235	-0.0600602	1.45799e+06	0.147852	2.78966	1.74656	0.985944	1050	0.147768	2.95711	1.78083	1046.97	0.986485	3.66411	8.14452	92.4533	-0.0602344
0.336	-2.00304	-0.072575	1.45799e+06	0.146441	2.76303	1.74099	0.985944	1050	0.146163	3.37719	1.86145	1040.28	0.987797	3.55062	8.89865	92.4533	-0.0728327
0.28832	-2.00014	-0.0662093	1.45799e+06	0.146229	2.75904	1.74015	0.985944	1050	0.146032	3.16642	1.8219	1043.12	0.987253	3.60532	8.52446	92.4533	-0.0664237
0.30176	-1.99105	-0.0895452	1.45799e+06	0.145564	2.74649	1.73751	0.985944	1050	0.1451	3.9151	1.95546	1034.06	0.989077	3.42736	9.82011	92.4533	-0.089942
0.2752	-2.00631	-0.0774937	1.45799e+06	0.14668	2.76755	1.74194	0.985944	1050	0.146347	3.53641	1.89026	1038.38	0.988167	3.51189	9.1762	92.4533	-0.0777876
0.32704	-2.02136	-0.0729737	1.45799e+06	0.14778	2.7883	1.74628	0.985944	1050	0.147511	3.39013	1.86383	1040.51	0.987718	3.54739	8.92137	92.4533	-0.073232
0.27104	-2.02949	-0.0692066	1.45799e+06	0.148374	2.79952	1.74862	0.985944	1050	0.148161	3.26625	1.84084	1042.36	0.987342	3.57889	8.70269	92.4533	-0.0694377
0.34656	-1.98922	-0.0777157	1.45799e+06	0.14543	2.74396	1.73697	0.985944	1050	0.145082	3.54361	1.89154	1037.94	0.988286	3.51019	9.18865	92.4533	-0.0780139
0.2768	-2.02149	-0.068406	1.45799e+06	0.14779	2.78848	1.74632	0.985944	1050	0.14758	3.23971	1.83584	1042.55	0.98732	3.58582	8.65549	92.4533	-0.0686326
0.2688	-2.01058	-0.0739416	1.45799e+06	0.146992	2.77343	1.74317	0.985944	1050	0.146703	3.4217	1.8696	1039.87	0.987863	3.53958	8.97667	92.4532	-0.0742083
0.27168	-1.98998	-0.0394209	1.45799e+06	0.145486	2.74502	1.7372	0.985944	1050	0.145805	2.20177	1.61408	1063.22	0.983765	3.92805	6.69065	92.4532	-0.0394967
0.26752	-2.02775	-0.0688537	1.45799e+06	0.148247	2.79711	1.74812	0.985944	1050	0.148037	3.25456	1.83864	1042.49	0.987321	3.58194	8.68191	92.4532	-0.0690826
0.2784	-2.04984	-0.0832187	1.45799e+06	0.149862	2.82759	1.75444	0.985944	1050	0.149497	3.71796	1.92207	1037.21	0.988331	3.47013	9.4876	92.4532	-0.0835507
0.26944	-2.05191	-0.0337356	1.45799e+06	0.150013	2.83044	1.75503	0.985944	1050	0.150611	1.97413	1.55642	1073.29	0.982009	4.03077	6.22116	92.4532	-0.0337894
0.26848	-1.99737	-0.0654783	1.45799e+06	0.146026	2.75521	1.73934	0.985944	1050	0.145837	3.14187	1.81717	1043.42	0.987201	3.61197	8.48032	92.4532	-0.0656883
0.272	-2.00649	-0.0606206	1.45799e+06	0.146693	2.76779	1.74199	0.985944	1050	0.146585	2.97648	1.78471	1046.25	0.986651	3.65847	8.18004	92.4532	-0.0607995
0.28384	-2.01088	-0.059311	1.45799e+06	0.147014	2.77385	1.74326	0.985944	1050	0.146931	2.93122	1.77562	1047.13	0.98648	3.67174	8.09691	92.4532	-0.0594818
0.2752	-1.75694	-0.0190782	1.45799e+06	0.128448	2.42355	1.66655	0.985944	1050	0.129199	1.32352	1.36221	1094.62	0.980195	4.4362	4.76548	92.4532	-0.0190982
0.26752	-1.99924	-0.0694523	1.45799e+06	0.146163	2.7578	1.73989	0.985944	1050	0.145922	3.2745	1.84239	1041.56	0.987554	3.57675	8.71734	92.4532	-0.0696886
0.29408	-1.98143	-0.0629609	1.45799e+06	0.144861	2.73323	1.73471	0.985944	1050	0.144694	3.05669	1.8006	1044.34	0.987059	3.63554	8.32634	92.4532	-0.0631565
0.34304	-2.02308	-0.0708126	1.45799e+06	0.147906	2.79068	1.74678	0.985944	1050	0.147666	3.31931	1.85076	1041.49	0.987524	3.56523	8.79667	92.4532	-0.0710554
0.27168	-1.95362	-0.0565407	1.45799e+06	0.142827	2.69486	1.72655	0.985944	1050	0.142735	2.83473	1.75592	1047.35	0.986561	3.70086	7.91823	92.4532	-0.0567004
0.30944	-2.00093	-0.023718	1.45799e+06	0.146286	2.76012	1.74038	0.985944	1050	0.147252	1.54206	1.4334	1092.49	0.979452	4.27538	5.27661	92.4532	-0.0237451
0.27648	-2.02351	-0.0767389	1.45799e+06	0.147937	2.79127	1.7469	0.985944	1050	0.147625	3.51209	1.88592	1039.03	0.988007	3.51767	9.13406	92.4532	-0.0770244
0.27936	-2.00474	-0.0923948	1.45799e+06	0.146565	2.76539	1.74148	0.985944	1050	0.146084	4.0024	1.96988	1033.5	0.989174	3.4092	9.96553	92.4532	-0.0928147
0.29664	-1.99437	-0.0991327	1.45799e+06	0.145807	2.75107	1.73847	0.985944	1050	0.145264	4.20618	2.00276	1031.54	0.989609	3.36848	10.301	92.4531	-0.0996195
0.26784	-2.02957	-0.0635908	1.45799e+06	0.148381	2.79963	1.74864	0.985944	1050	0.148248	3.07794	1.80477	1045.16	0.986807	3.62959	8.3649	92.4531	-0.0637856
0.28128	-2.03069	-0.0583127	1.45799e+06	0.148462	2.80117	1.74896	0.985944	1050	0.148415	2.89649	1.76858	1048.24	0.986233	3.68209	8.03283	92.4531	-0.0584762
0.26336	-1.99184	-0.0582923	1.45799e+06	0.145622	2.74758	1.73774	0.985944	1050	0.145537	2.89589	1.76846	1047.26	0.986496	3.68227	8.03172	92.4531	-0.0584589
0.27968	-2.05658	-0.0861776	1.45799e+06	0.150355	2.83689	1.75637	0.985944	1050	0.149964	3.81046	1.93788	1036.36	0.988496	3.44975	9.64433	92.4531	-0.0865327
0.28192	-2.03071	-0.0628989	1.45799e+06	0.148464	2.8012	1.74897	0.985944	1050	0.148342	3.05441	1.80015	1045.57	0.986729	3.63618	8.32221	92.4531	-0.0630893
0.34528	-1.98474	-0.0632109	1.45799e+06	0.145103	2.73779	1.73567	0.985944	1050	0.144935	3.06518	1.80227	1044.28	0.987063	3.63316	8.34176	92.4532	-0.0634078
0.27968	-2.03886	-0.0485003	1.45799e+06	0.14906	2.81245	1.75131	0.985944	1050	0.149214	2.54567	1.69408	1055.61	0.984904	3.7959	7.37036	92.4532	-0.0486126
0.26816	-2.0291	-0.0645523	1.45799e+06	0.148346	2.79898	1.74851	0.985944	1050	0.148198	3.11052	1.81111	1044.64	0.986906	3.62056	8.42381	92.4532	-0.0647531
0.26752	-2.04405	-0.0552667	1.45799e+06	0.149439	2.8196	1.75279	0.985944	1050	0.14946	2.78957	1.74654	1050.58	0.985779	3.71491	7.8339	92.4532	-0.0554124
0.26752	-2.01438	-0.058717	1.45799e+06	0.14727	2.77868	1.74427	0.985944	1050	0.1472	2.9106	1.77145	1047.57	0.98639	3.67787	8.0589	92.4532	-0.0588841
0.29152	-2.031	-0.0802761	1.45799e+06	0.148485	2.8016	1.74905	0.985944	1050	0.148138	3.62509	1.90593	1037.86	0.988229	3.49119	9.32895	92.4532	-0.0805877
0.34368	-2.00563	-0.0843852	1.45799e+06	0.146631	2.76661	1.74174	0.985944	1050	0.146224	3.75478	1.92839	1035.94	0.988664	3.46195	9.55015	92.4532	-0.0847344
0.3072	-2.03074	-0.081781	1.45799e+06	0.148466	2.80124	1.74898	0.985944	1050	0.148103	3.67275	1.91425	1037.32	0.988339	3.48031	9.41054	92.4532	-0.0821046
0.27072	-2.01953	-0.0596283	1.45799e+06	0.147646	2.78578	1.74575	0.985944	1050	0.147566	2.94219	1.77783	1047.16	0.986456	3.66849	8.1171	92.4532	-0.0598003
0.27776	-2.03016	-0.0476929	1.45799e+06	0.148424	2.80045	1.74881	0.985944	1050	0.148586	2.51593	1.68746	1056.06	0.984849	3.80642	7.31284	92.4532	-0.0478019
0.32832	-2.0248	-0.0901211	1.45799e+06	0.148032	2.79305	1.74727	0.985944	1050	0.147582	3.93262	1.95837	1034.53	0.988927	3.42368	9.84936	92.4532	-0.0905162
0.26848	-1.97813	-0.0244874	1.45799e+06	0.14462	2.72868	1.73374	0.985944	1050	0.145498	1.57702	1.44415	1089.26	0.979974	4.25241	5.35606	92.4532	-0.0245167
0.2816	-2.02459	-0.0537841	1.45799e+06	0.148016	2.79276	1.74721	0.985944	1050	0.148045	2.73697	1.7355	1051.09	0.985731	3.73161	7.73512	92.4532	-0.0539234
0.27264	-2.01704	-0.0604448	1.45799e+06	0.147464	2.78235	1.74504	0.985944	1050	0.147369	2.97039	1.78349	1046.61	0.986562	3.66024	8.16888	92.4532	-0.0606218
0.2768	-2.01378	-0.0564367	1.45799e+06	0.147226	2.77784	1.74409	0.985944	1050	0.147194	2.83091	1.75513	1049	0.986132	3.70204	7.91111	92.4532	-0.056591
0.29856	-2.02465	-0.0820585	1.45799e+06	0.14802	2.79284	1.74723	0.985944	1050	0.14765	3.68154	1.91577	1037.11	0.988394	3.47831	9.42556	92.4532	-0.0823853
0.27456	-2.0253	-0.0711134	1.45799e+06	0.148069	2.79375	1.74742	0.985944	1050	0.147827	3.32919	1.85259	1041.4	0.987536	3.56272	8.81413	92.4532	-0.071358
0.27168	-2.00519	-0.0759439	1.45799e+06	0.146598	2.76599	1.74161	0.985944	1050	0.146281	3.48656	1.88134	1038.96	0.988055	3.52379	9.08975	92.4532	-0.0762261
0.36832	-2.02103	-0.0885076	1.45799e+06	0.147756	2.78784	1.74618	0.985944	1050	0.147319	3.88291	1.95008	1034.94	0.988847	3.43417	9.7662	92.4532	-0.0888892
0.2704	-2.00299	-0.0698631	1.45799e+06	0.146437	2.76296	1.74097	0.985944	1050	0.146193	3.28807	1.84493	1041.46	0.987566	3.57324	8.74141	92.4532	-0.0701018
0.37216	-1.99212	-0.0798109	1.45799e+06	0.145643	2.74798	1.73782	0.985944	1050	0.145274	3.6105	1.90337	1037.24	0.988423	3.49456	9.3039	92.4532	-0.080125
0.27168	-2.00116	-0.0559002	1.45799e+06	0.146303	2.76044	1.74044	0.985944	1050	0.146269	2.81205	1.75122	1049.01	0.986156	3.70788	7.87595	92.4532	-0.0560525
0.28	-2.00057	-0.0637774	1.45799e+06	0.14626	2.75962	1.74027	0.985944	1050	0.146098	3.08437	1.80602	1044.37	0.987015	3.6278	8.37654	92.4532	-0.0639762
0.27456	-1.97516	-0.0552392	1.45799e+06	0.144403	2.72458	1.73287	0.985944	1050	0.144353	2.78878	1.74638	1048.76	0.986259	3.71515	7.83242	92.4532	-0.0553899
0.2768	-2.01016	-0.0540754	1.45799e+06	0.146961	2.77285	1.74305	0.985944	1050	0.146969	2.74738	1.73769	1050.49	0.98587	3.72827	7.75473	92.4532	-0.0542172
0.27616	-2.02382	-0.0788242	1.45799e+06	0.14796	2.7917	1.74699	0.985944	1050	0.147624	3.5789	1.8978	1038.25	0.988164	3.5019	9.24954	92.4532	-0.0791256
0.26528	-2.03016	-0.0670617	1.45799e+06	0.148424	2.80044	1.74881	0.985944	1050	0.14824	3.19487	1.82733	1043.4	0.987141	3.59769	8.57542	92.4532	-0.0672784
0.26688	-2.0492	-0.0617846	1.45799e+06	0.149815	2.8267	1.75426	0.985944	1050	0.149729	3.0163	1.79264	1046.64	0.986491	3.64699	8.25285	92.4532	-0.0619666
0.27904	-2.00194	-0.0598627	1.45799e+06	0.14636	2.76151	1.74067	0.985944	1050	0.146259	2.95035	1.77947	1046.57	0.986601	3.66609	8.1321	92.4532	-0.0600375
0.27456	-2.03403	-0.0573362	1.45799e+06	0.148706	2.80578	1.74992	0.985944	1050	0.14868	2.8624	1.76161	1048.94	0.986098	3.69239	7.96968	92.4532	-0.0574939
0.26496	-1.97885	-0.0535178	1.45799e+06	0.144672	2.72967	1.73395	0.985944	1050	0.144658	2.72758	1.73351	1050.04	0.986023	3.73463	7.71743	92.4532	-0.053659
0.26848	-2.02416	-0.0718216	1.45799e+06	0.147985	2.79216	1.74708	0.985944	1050	0.147733	3.35244	1.8569	1041.07	0.987604	3.55683	8.85512	92.4533	-0.0720713
0.2752	-2.01118	-0.0139953	1.45799e+06	0.147036	2.77426	1.74334	0.985944	1050	0.148823	1.06393	1.2666	1136.88	0.974083	4.6808	4.11998	92.4533	-0.0140046
0.27744	-2.03062	-0.0445561	1.45799e+06	0.148457	2.80107	1.74894	0.985944	1050	0.148694	2.39886	1.66087	1058.99	0.984352	3.84941	7.08419	92.4533	-0.0446511
0.27968	-2.02047	-0.055921	1.45799e+06	0.147715	2.78708	1.74602	0.985944	1050	0.1477	2.81274	1.75137	1049.51	0.986024	3.70766	7.87723	92.4533	-0.056072
0.2944	-2.06142	-0.0777026	1.45799e+06	0.150709	2.84356	1.75774	0.985944	1050	0.150413	3.54285	1.89141	1039.46	0.987857	3.51036	9.18734	92.4533	-0.0779899
0.2848	-2.0083	-0.073082	1.45799e+06	0.146825	2.77029	1.74251	0.985944	1050	0.146545	3.39372	1.86449	1040.18	0.987807	3.5465	8.92767	92.4533	-0.0733428
0.26816	-2.05222	-0.0629432	1.45799e+06	0.150036	2.83086	1.75512	0.985944	1050	0.149934	3.05585	1.80044	1046.06	0.986592	3.63577	8.32484	92.4533	-0.0631318
0.2672	-1.97426	-0.0607176	1.45799e+06	0.144337	2.72334	1.73261	0.985944	1050	0.144197	2.97991	1.7854	1045.39	0.986877	3.65746	8.18635	92.4533	-0.0609
0.2848	-2.01197	-0.0569075	1.45799e+06	0.147093	2.77534	1.74357	0.985944	1050	0.147052	2.84744	1.75854	1048.64	0.9862	3.69695	7.94189	92.4533	-0.0570645
0.27968	-2.0049	-0.0859613	1.45799e+06	0.146576	2.76559	1.74153	0.985944	1050	0.146154	3.80401	1.93678	1035.42	0.988773	3.45114	9.63346	92.4533	-0.086324
0.29024	-1.97321	-0.058556	1.45799e+06	0.14426	2.72188	1.7323	0.985944	1050	0.144153	2.90513	1.77034	1046.62	0.986652	3.6795	8.0488	92.4533	-0.0587257
0.2672	-2.00615	-0.0623524	1.45799e+06	0.146668	2.76732	1.74189	0.985944	1050	0.146532	3.03585	1.7965	1045.27	0.986835	3.64142	8.28848	92.4533	-0.0625418
0.27136	-2.06798	-0.0974963	1.45799e+06	0.151188	2.85261	1.7596	0.985944	1050	0.150698	4.15655	1.99486	1033.26	0.989131	3.37818	10.2198	92.4533	-0.0979497
0.26976	-2.03641	-0.050189	1.45799e+06	0.14888	2.80906	1.7506	0.985944	1050	0.148995	2.60745	1.70768	1054.14	0.985165	3.7745	7.48913	92.4534	-0.0503095
0.28128	-2.01285	-0.0597244	1.45799e+06	0.147157	2.77655	1.74382	0.985944	1050	0.147069	2.94553	1.77851	1046.93	0.986512	3.6675	8.12326	92.4534	-0.0598975
0.27744	-2.0342	-0.0489752	1.45799e+06	0.148719	2.80601	1.74997	0.985944	1050	0.148857	2.56311	1.69794	1055.08	0.985008	3.78978	7.404	92.4534	-0.04909
0.27552	-2.01933	-0.0497804	1.45799e+06	0.147631	2.7855	1.74569	0.985944	1050	0.147734	2.59259	1.70443	1053.98	0.985234	3.77958	7.46066	92.4534	-0.0498999
0.26624	-2.01844	-0.0462079	1.45799e+06	0.147566	2.78427	1.74544	0.985944	1050	0.147748	2.46082	1.67505	1057.04	0.984711	3.82633	7.20568	92.4534	-0.0463108
0.27424	-2.0226	-0.0906806	1.45799e+06	0.14787	2.79	1.74663	0.985944	1050	0.147414	3.94981	1.96122	1034.32	0.988974	3.42008	9.87807	92.4534	-0.0910812
0.26688	-2.04244	-0.0579044	1.45799e+06	0.149321	2.81738	1.75233	0.985944	1050	0.149293	2.88223	1.76567	1048.8	0.986106	3.68637	8.00645	92.4534	-0.0580646
0.27232	-2.01986	-0.0818352	1.45799e+06	0.14767	2.78623	1.74585	0.985944	1050	0.147299	3.67452	1.91455	1037.09	0.988406	3.4799	9.41358	92.4534	-0.0821611
0.27072	-2.03066	-0.0942087	1.45799e+06	0.14846	2.80112	1.74895	0.985944	1050	0.147976	4.05746	1.97888	1033.47	0.989141	3.39796	10.0567	92.4534	-0.0946397
0.27008	-2.01403	-0.028783	1.45799e+06	0.147244	2.77819	1.74416	0.985944	1050	0.147979	1.7663	1.49976	1080.78	0.981026	4.13871	5.77649	92.4534	-0.0288229
0.27456	-2.0661	-0.0719751	1.45799e+06	0.151051	2.85002	1.75907	0.985944	1050	0.150831	3.3573	1.85779	1041.93	0.987359	3.5556	8.8637	92.4534	-0.0722207
0.27328	-1.96463	-0.0703376	1.458e+06	0.143632	2.71004	1.72979	0.985944	1050	0.143352	3.30389	1.84789	1040.39	0.987846	3.56917	8.76945	92.4534	-0.0705844
0.26976	-2.02728	-0.056845	1.458e+06	0.148213	2.79646	1.74798	0.985944	1050	0.148188	2.84521	1.75808	1049.08	0.986087	3.69763	7.93775	92.4534	-0.0570005
0.27072	-1.99076	-0.0769955	1.458e+06	0.145542	2.74608	1.73742	0.985944	1050	0.145203	3.52049	1.88742	1038.25	0.988222	3.51566	9.14865	92.4535	-0.0772878
0.26816	-2.0087	-0.0879889	1.458e+06	0.146854	2.77083	1.74262	0.985944	1050	0.146414	3.86695	1.94741	1034.86	0.988882	3.43757	9.73943	92.4535	-0.0883684
0.27712	-2.03296	-0.0491742	1.458e+06	0.148628	2.8043	1.74961	0.985944	1050	0.14876	2.57041	1.69955	1054.87	0.985046	3.78724	7.41805	92.4535	-0.04929
0.28352	-2.07399	-0.0844699	1.458e+06	0.151627	2.86089	1.7613	0.985944	1050	0.151265	3.75707	1.92878	1037.26	0.988281	3.46143	9.55406	92.4535	-0.084808
0.27264	-2.08354	-0.0761995	1.458e+06	0.152325	2.87406	1.764	0.985944	1050	0.152066	3.49446	1.88275	1040.52	0.987606	3.52188	9.1035	92.4535	-0.0764727
0.27232	-1.98684	-0.0737347	1.458e+06	0.145256	2.74068	1.73628	0.985944	1050	0.144952	3.41507	1.86839	1039.44	0.987991	3.5412	8.9651	92.4535	-0.0740031
0.3264	-2.02231	-0.0911963	1.458e+06	0.147849	2.7896	1.74655	0.985944	1050	0.147388	3.96563	1.96383	1034.17	0.989007	3.41678	9.90444	92.4535	-0.0916015
0.27488	-1.97309	-0.080587	1.458e+06	0.14425	2.72171	1.73226	0.985944	1050	0.143861	3.63525	1.90771	1036.57	0.988589	3.48885	9.34641	92.4535	-0.0809105
0.27808	-2.00543	-0.0501172	1.458e+06	0.146615	2.76631	1.74168	0.985944	1050	0.146695	2.6049	1.70712	1053.31	0.985383	3.77536	7.48427	92.4535	-0.0502392
0.26688	-2.04529	-0.0358407	1.458e+06	0.149529	2.8213	1.75314	0.985944	1050	0.150041	2.05965	1.57857	1069.85	0.982559	3.99049	6.39957	92.4536	-0.0359016
0.27136	-2.03	-0.0172764	1.458e+06	0.148411	2.80021	1.74876	0.985944	1050	0.149909	1.23415	1.33083	1118.47	0.97607	4.51261	4.5485	92.4536	-0.0172905
0.27008	-2.03439	-0.0693005	1.458e+06	0.148732	2.80627	1.75002	0.985944	1050	0.148522	3.26934	1.84142	1042.43	0.98732	3.57808	8.70821	92.4536	-0.0695316
0.27136	-2.0465	-0.0527194	1.458e+06	0.149618	2.82297	1.75349	0.985944	1050	0.149691	2.69884	1.7274	1052.46	0.985437	3.74396	7.66315	92.4536	-0.0528518
0.28416	-1.992	-0.0814209	1.458e+06	0.145633	2.7478	1.73778	0.985944	1050	0.145248	3.66157	1.9123	1036.67	0.988538	3.48283	9.39147	92.4536	-0.081748
0.30144	-2.04882	-0.0675179	1.458e+06	0.149787	2.82617	1.75415	0.985944	1050	0.149614	3.21003	1.83022	1043.61	0.987065	3.59364	8.60258	92.4536	-0.0677356
0.3088	-2.02573	-0.0688479	1.458e+06	0.148099	2.79433	1.74754	0.985944	1050	0.147888	3.25437	1.83861	1042.44	0.987334	3.58197	8.68161	92.4536	-0.069077
0.28416	-2.01599	-0.0619857	1.458e+06	0.147387	2.78089	1.74473	0.985944	1050	0.147266	3.02329	1.79402	1045.71	0.986732	3.64498	8.26562	92.4536	-0.062172
0.29536	-1.99011	-0.0641	1.458e+06	0.145495	2.74519	1.73723	0.985944	1050	0.145319	3.09534	1.80816	1043.95	0.987115	3.62474	8.39643	92.4536	-0.0643019
0.2688	-1.99059	-0.0531153	1.458e+06	0.14553	2.74585	1.73737	0.985944	1050	0.145535	2.71316	1.73045	1050.64	0.985888	3.73929	7.69023	92.4536	-0.0532535
0.32128	-2.0294	-0.0731847	1.458e+06	0.148368	2.79939	1.74859	0.985944	1050	0.148103	3.39698	1.86508	1040.6	0.987686	3.54568	8.93341	92.4536	-0.0734434
0.27008	-2.01205	-0.0686078	1.458e+06	0.147099	2.77545	1.74359	0.985944	1050	0.146879	3.24645	1.83712	1042.24	0.987398	3.58404	8.66752	92.4536	-0.0688368
0.27328	-2.0435	-0.0753565	1.458e+06	0.149398	2.81883	1.75263	0.985944	1050	0.149117	3.46742	1.87789	1040.01	0.987778	3.5284	9.05649	92.4536	-0.075629
0.37856	-2.02843	-0.0755122	1.458e+06	0.148296	2.79805	1.74831	0.985944	1050	0.148002	3.47252	1.87881	1039.62	0.987881	3.52717	9.06536	92.4536	-0.0757879
0.30976	-2.01564	-0.0558553	1.458e+06	0.147361	2.7804	1.74463	0.985944	1050	0.147342	2.81043	1.75089	1049.43	0.98605	3.70837	7.87295	92.4536	-0.0560063
0.2672	-2.02087	-0.0346043	1.458e+06	0.147744	2.78762	1.74614	0.985944	1050	0.14826	2.00965	1.56569	1070.77	0.982489	4.01376	6.29557	92.4536	-0.0346617
0.27584	-2.01857	-0.0639704	1.458e+06	0.147576	2.78445	1.74547	0.985944	1050	0.147427	3.09086	1.80729	1044.7	0.986917	3.62598	8.38832	92.4536	-0.0641686
0.26784	-2.00623	-0.0535944	1.458e+06	0.146673	2.76742	1.74191	0.985944	1050	0.146686	2.73025	1.73407	1050.73	0.985838	3.73376	7.72248	92.4536	-0.053734
0.27392	-2.00144	-0.0740299	1.458e+06	0.146323	2.76082	1.74052	0.985944	1050	0.146027	3.42461	1.87013	1039.64	0.987926	3.53885	8.98179	92.4536	-0.0742985
0.2752	-1.98809	-0.0753511	1.458e+06	0.145347	2.74239	1.73664	0.985944	1050	0.145025	3.4675	1.8779	1038.82	0.988111	3.52838	9.05662	92.4536	-0.0756313
0.27264	-2.0144	-0.0763196	1.458e+06	0.14727	2.77869	1.74427	0.985944	1050	0.146956	3.49863	1.8835	1039	0.988029	3.52088	9.11076	92.4536	-0.0766033
0.29056	-2.04493	-0.0686941	1.458e+06	0.149503	2.82081	1.75304	0.985944	1050	0.149309	3.24919	1.83763	1042.95	0.987199	3.58332	8.6724	92.4536	-0.06892
0.30464	-1.97991	-0.0924162	1.458e+06	0.144749	2.73112	1.73426	0.985944	1050	0.144254	4.00321	1.97002	1033.03	0.989311	3.40902	9.96692	92.4536	-0.0928416
0.27168	-2.06083	-0.0755402	1.458e+06	0.150665	2.84273	1.75757	0.985944	1050	0.150395	3.47328	1.87894	1040.3	0.987689	3.52698	9.06669	92.4536	-0.0758117
0.29952	-2.01751	-0.0558613	1.458e+06	0.147498	2.78298	1.74517	0.985944	1050	0.14748	2.81064	1.75093	1049.47	0.986037	3.7083	7.87333	92.4536	-0.0560122
0.29856	-2.01649	-0.0626384	1.458e+06	0.147423	2.78157	1.74487	0.985944	1050	0.147293	3.04558	1.79842	1045.36	0.986796	3.63866	8.3062	92.4536	-0.0628286
0.32928	-2.12167	-0.0861664	1.458e+06	0.155113	2.92666	1.7747	0.985944	1050	0.154767	3.80977	1.93776	1037.62	0.988129	3.44988	9.6432	92.4536	-0.0865103
0.2832	-2.0294	-0.0747873	1.458e+06	0.148368	2.79939	1.74859	0.985944	1050	0.148083	3.44906	1.87457	1039.93	0.987818	3.53286	9.02449	92.4536	-0.0750576
0.28576	-2.01014	-0.0739733	1.458e+06	0.146959	2.77281	1.74304	0.985944	1050	0.146669	3.42273	1.86978	1039.85	0.987868	3.53931	8.9785	92.4536	-0.0742402
0.2864	-2.03603	-0.0562505	1.458e+06	0.148852	2.80853	1.75049	0.985944	1050	0.148847	2.8243	1.75376	1049.7	0.985955	3.70406	7.89882	92.4536	-0.0564021
0.30368	-2.03789	-0.0651659	1.458e+06	0.148988	2.8111	1.75103	0.985944	1050	0.148839	3.1312	1.81511	1044.53	0.98691	3.61487	8.46115	92.4536	-0.0653697
0.28256	-2.01796	-0.0556018	1.458e+06	0.147531	2.78361	1.7453	0.985944	1050	0.147519	2.80147	1.74902	1049.66	0.986003	3.71117	7.85621	92.4535	-0.0557512
0.26912	-1.99405	-0.0645054	1.458e+06	0.145783	2.75062	1.73838	0.985944	1050	0.145605	3.10905	1.81082	1043.83	0.987129	3.62095	8.4212	92.4535	-0.0647095

[truncated: 20 more sheets: HxWxL=3x8x210 | d=2, HxWxL=3x8x210 | d=2.5, HxWxL=8x8x210 | d=3, HxWxL=8x8x210 | d=4, HxWxL=8x8x210 | d=5, HxWxL=8x8x210 | d=6, HxWxL=8x8x210 | d=7, HxWxL=15x20x355 | d=6, HxWxL=15x20x355 | d=7, HxWxL=15x20x355 | d=8, HxWxL=15x20x355 | d=9, HxWxL=15x20x355 | d=10, HxWxL=15x20x355 | d=12, HxWxL=15x20x321 | d=6, HxWxL=15x20x321 | d=7, HxWxL=15x20x321 | d=8, HxWxL=15x20x321 | d=9, HxWxL=15x20x321 | d=10, HxWxL=15x20x321 | d=12, HxWxL=15x20x321 | d=9.2]
